# Supplementary material
Source: publisher figshare collection journal article supplement (https://acs.figshare.com/ndownloader/files/5829870)
Supplement: Supplementary file 1 [file 5829870]

Supporting Information for:

Stereocontrolled Synthesis of 2,3-Anhydro-  
 $\beta$ -D-lyxofuranosyl Glycosides

Rajendrakumar Reddy Gadikota, Christopher S. Callam, and Todd L. Lowary\*

Department of Chemistry, The Ohio State University, Columbus, Ohio 43210

lowary.2@osu.edu

**General.** Solvents were distilled from the appropriate drying agents before use. Unless stated otherwise, all reactions were carried out under a positive pressure of argon and were monitored by TLC on silica gel 60 F<sub>254</sub> (0.25 mm, E. Merck). Spots were detected under UV light or by charring with 10% H<sub>2</sub>SO<sub>4</sub> in ethanol. Solvents were evaporated under reduced pressure and below 40 °C (bath). Organic solutions of crude products were dried over anhydrous Na<sub>2</sub>SO<sub>4</sub>. Column chromatography was performed on silica gel 60 (40-60 μM). The ratio between silica gel and crude product ranged from 100 to 50:1 (w/w). Optical rotations were measured at 21±2 °C. Melting points are uncorrected. <sup>1</sup>H NMR spectra were recorded at 400 or 500 MHz, and chemical shifts are referenced to either TMS (0.0, CDCl<sub>3</sub>) or external dioxane (3.75, D<sub>2</sub>O). <sup>13</sup>C NMR spectra were recorded at 125 MHz, and <sup>13</sup>C chemical shifts are referenced to CDCl<sub>3</sub> (77.00, CDCl<sub>3</sub>) or external dioxane (68.11, D<sub>2</sub>O). Elemental analyses were performed by Atlantic Microlab Inc., Norcross, GA. Melting points are uncorrected. Electrospray mass spectra were recorded on samples suspended in THF or CH<sub>3</sub>OH. Acceptors **8–13**, and **15** were prepared as previously reported;<sup>1</sup> acceptors **14**, and **16** as described below. Product yields from glycosylation reactions are given in Table 1.

***p*-Tolyl 2,3-anhydro-5-*O*-benzoyl-1-thio- $\alpha$ -D-lyxofuranoside (2).** Compound **4** (2.0 g, 7.8 mmol), triphenylphosphine (5.2 g, 20 mmol), and benzoic acid (1.42 g, 12 mmol) were dissolved in tetrahydrofuran (50 mL) and the solution was cooled to 0 °C. Diisopropylazodicarboxylate (3.86 mL, 19.5 mmol) was added dropwise over a period of 10 min. After complete addition, the reaction mixture was allowed to warm to room temperature and was stirred for 45 min. The solution was subsequently concentrated to yield a crude oil which upon trituration with cold diethyl ether precipitated triphenylphosphine oxide. The solid was filtered off and the filtrate was concentrated. The resulting oil was purified by chromatography (hexanes/EtOAc, 5:1) to obtain **2** (2.10 g, 82%) as a white crystalline solid: *R*<sub>f</sub> 0.69 (hexanes/EtOAc, 3:1); [ $\alpha$ ]<sub>D</sub> +125.4° (*c* 1.1, CHCl<sub>3</sub>); mp 60–61 °C; <sup>1</sup>H NMR (500 MHz, CDCl<sub>3</sub>,  $\delta$ ) 8.07 (dd, 2 H, *J* = 7.1, 0.9 Hz), 7.60 (dd, 1 H, *J* = 7.4, 7.3 Hz), 7.47–7.43 (m, 4 H), 7.13 (d, *J* = 8.0 Hz, 2 H), 5.52 (s, 1 H), 4.56 (dd, 1 H, *J* = 11.3, 5.7 Hz), 4.52 (dd, 1 H, *J* = 11.3, 5.7 Hz), 4.29 (dd, 1 H, *J* = 5.8 Hz), 3.95 (d, 1 H, *J* = 2.8 Hz), 3.84 (d, 1 H, *J* = 2.8 Hz), 2.34 (s, 3 H); <sup>13</sup>C NMR (125.7 MHz, CDCl<sub>3</sub>,  $\delta$ ) 166.0, 138.2, 133.2, 133.1, 129.8, 129.6, 129.5, 128.4, 128.3, 87.0, 74.0, 62.2, 57.5, 55.5, 21.0. Anal. Calcd for C<sub>19</sub>H<sub>18</sub>O<sub>4</sub>S: C, 66.66, 5.26. Found: C, 66.48; H, 5.34.

**2,3-anhydro 5-*O*-benzoyl- $\alpha$ -D-lyxofuranosyl *p*-tolyl (R/S) sulfoxide (3).** To a solution of **2** (1.0 g, 2.92 mmol) in CH<sub>2</sub>Cl<sub>2</sub> (20 mL) at -78 °C was added *m*-chloroperbenzoic acid (0.55 g, 3.21 mmol). After stirring for 2 h the reaction mixture was warmed to room temperature and stirred for 30 min. The reaction mixture was washed with a saturated solution of NaHCO<sub>3</sub> and then water. The organic layer was dried, filtered, and concentrated to yield a crude oil which was purified by chromatography (hexanes/EtOAc, 2:1) to provide the title compounds **3 Fast** (0.400 g, 40%) and **3 Slow** (0.452 g, 38%) as white crystalline solids.

**(3 Fast)** *R<sub>f</sub>* 0.36 (hexanes/EtOAc, 1:1); [ $\alpha$ ]<sub>D</sub> -188.8° (*c* 1.5, CHCl<sub>3</sub>); mp 71–72 °C; <sup>1</sup>H NMR (500 MHz, CDCl<sub>3</sub>,  $\delta$ ) 8.11 (dd, 2 H, *J* = 7.4, 7.1 Hz), 7.61 (dd, 1 H, *J* = 7.4, 7.3 Hz), 7.63 (d, 2 H, *J* = 8.2 Hz), 7.50 (dd, 2 H, *J* = 7.4 Hz, 7.1 Hz), 7.40 (d, 2 H, *J* = 8.2 Hz), 4.79 (s, 1 H), 4.74 (dd, 1 H, *J* = 5.9, 5.9 Hz), 4.54 (dd, 2 H, *J* = 5.7, 1.7 Hz), 4.07–4.05 (m, 2 H), 2.48 (s, 3 H). <sup>13</sup>C NMR (125.7 MHz, CDCl<sub>3</sub>,  $\delta$ ) 166.9, 142.2, 136.5, 133.3, 130.2, 129.7, 129.6, 128.4, 124.2, 96.1, 77.7, 62.4, 56.1, 55.2, 21.4. Anal. Calcd for C<sub>19</sub>H<sub>18</sub>O<sub>5</sub>S: C, 63.68, 5.02. Found: C, 63.44; H, 5.06.

**(3 Slow)** *R<sub>f</sub>* 0.31 (hexanes/EtOAc, 1:1); [ $\alpha$ ]<sub>D</sub> +196.0° (*c* 3.0, CHCl<sub>3</sub>); mp 65–66 °C; <sup>1</sup>H NMR (500 MHz, CDCl<sub>3</sub>,  $\delta$ ) 8.06 (dd, 2 H, *J* = 7.4, 7.1 Hz), 7.63–7.61 (m, 3 H), 7.49 (d, 2 H, *J* = 7.4, 7.1 Hz), 7.37 (d, 2 H, *J* = 8.2 Hz), 4.88 (s, 1 H), 4.64 (dd, 1 H, *J* = 6.1, 6.0 Hz), 4.49–4.42 (m, 2 H), 4.26 (d, 1 H, *J* = 2.8 Hz), 4.00 (dd, 1 H, *J* = 2.8, 0.8 Hz), 2.46 (s, 3 H); <sup>13</sup>C NMR (125.7 MHz, CDCl<sub>3</sub>,  $\delta$ ) 166.0, 142.5, 136.2, 133.2, 129.9, 129.7, 129.6, 128.4, 125.2, 94.7, 78.7, 62.3, 56.5, 56.3, 21.5. Anal. Calcd for C<sub>19</sub>H<sub>18</sub>O<sub>5</sub>S: C, 63.68, 5.02. Found: C, 63.49; H, 5.05.

### General Procedures for Glycosylations

**Method A:** To a mixture of the alcohol (0.5 mmol, vacuum dried overnight), donor **2** (0.6 mmol) and 4 Å molecular sieves (0.1 g) was added CH<sub>2</sub>Cl<sub>2</sub> (10 mL). The mixture was cooled to -40 °C and then *N*-iodosuccinimide (0.6 mmol) and silver triflate (0.15 mmol) were added. After stirring for 15–30 min at this temperature, the reaction mixture turned dark red/brown and then triethylamine was added. The reaction mixture was then diluted with CH<sub>2</sub>Cl<sub>2</sub> and filtered through Celite. The filtrate was concentrated to give a crude residue which was purified by chromatography to obtain the product.

**Method B:** Donor **3** (0.5 mmol), 2,6-di-*tert*-butyl-4-methyl pyridine (2.0 mmol), 4 Å molecular sieves (0.1 g) were dried overnight under vacuum in the presence of P<sub>2</sub>O<sub>5</sub>. To this mixture was added CH<sub>2</sub>Cl<sub>2</sub> (10 mL) and the reaction mixture was cooled to -78 °C. Triflic anhydride (0.6 mmol) was added and the mixture was allowed to stir for 10 min. A solution of

the vacuum dried alcohol (0.6 mmol) in  $\text{CH}_2\text{Cl}_2$  (1.0 mL) was added via syringe dropwise over 5 min. After 15 min, the reaction mixture turned dark brown/green and a saturated solution of  $\text{NaHCO}_3$  was added and then the solution was allowed to warm to room temperature. The resulting solution was filtered through Celite, dried, filtered, and concentrated to yield a crude oil which was purified by chromatography to obtain the product.

**Methyl 5-*O*-(2,3-anhydro- $\beta$ -D-lyxofuranosyl)-2,3-anhydro- $\alpha$ -D-lyxofuranoside (14).**

The compound was isolated after Zemplen deacylation<sup>2</sup> of methyl 5-*O*-(5-*O*-benzoyl-2,3-anhydro- $\alpha$ -D-lyxofuranosyl)-2,3-anhydro- $\alpha$ -D-lyxofuranoside<sup>3</sup> Chromatography (hexanes/EtOAc, 3:1) yielded the product as a white solid:  $R_f$  0.15 (hexanes/EtOAc, 2:1);  $[\alpha]_D^{+46.9}$  (c 0.6,  $\text{CHCl}_3$ ); mp 113–114 °C;  $^1\text{H}$  NMR (500 MHz,  $\text{CDCl}_3$ ,  $\delta$ ) 5.30 (s, 1 H), 5.14 (s, 1 H), 4.19–4.15 (m, 2 H), 3.93–3.86 (m, 3 H), 3.76 (d, 1 H,  $J = 2.8$  Hz), 3.74 (d, 1 H,  $J = 2.8$  Hz), 3.72–3.66 (m, 3 H), 3.42 (s, 3 H);  $^{13}\text{C}$  NMR (125.7 MHz,  $\text{CDCl}_3$ ,  $\delta$ ) 102.6, 102.0, 76.8, 75.0, 66.9, 62.1, 56.6, 56.0, 54.6, 54.5. HRMS (ESI) calcd for (M+Na)  $\text{C}_{11}\text{H}_{16}\text{O}_7$ : 283.0794, found 283.0796.

**Methyl 3,5-di-*O*-benzyl- $\alpha$ -D-arabinofuranoside (16).** To a solution of methyl 5-*O*-benzyl-2,3-anhydro- $\alpha$ -D-lyxofuranoside<sup>4</sup> (1.2 g, 0.5 mmol) dissolved in dry DMF (5 mL) was added 1M sodium benzyolate in benzyl alcohol (1.0 mL, 1.0 mmol) The reaction mixture was stirred at 100 °C for 2.5 h and then cooled and neutralized with acetic acid. The excess benzyl alcohol was removed by vacuum distillation and the crude oil was purified by chromatography (hexanes/EtOAc, 2:1) to yield the **16** (1.5 g, 84%) as a colorless oil:  $R_f$  0.36 (hexanes/EtOAc, 2:1);  $[\alpha]_D^{+125.4}$  (c 1.2,  $\text{CHCl}_3$ );  $^1\text{H}$  NMR (500 MHz,  $\text{CDCl}_3$ ,  $\delta$ ) 7.33–7.24 (m, 10 H), 4.89 (s, 1 H), 4.68 (d, 1 H,  $J = 12.3$  Hz), 4.60 (d, 1 H,  $J = 11.8$  Hz), 4.52 (d, 1 H,  $J = 12.3$  Hz), 4.45 (d, 1 H,  $J = 11.8$  Hz), 4.25 (dd, 1 H,  $J = 5.2, 2.5$  Hz), 4.11 (d, 1 H,  $J = 10.6$  Hz), 3.83 (d, 1 H,  $J = 2.8$  Hz), 3.64 (dd, 1 H,  $J = 10.3, 2.3$  Hz), 3.43 (dd, 1 H,  $J = 10.4, 2.4$  Hz), 3.41 (s, 3 H), 3.29 (d, 1 H,  $J = 10.9$  Hz);  $^{13}\text{C}$  NMR (125.7 MHz,  $\text{CDCl}_3$ ,  $\delta$ ) 138.1, 137.4, 128.9, 128.8, 128.4, 128.3, 128.2, 110.9, 85.3, 83.9, 78.3, 74.1, 72.5, 70.1, 55.6. HRMS (ESI) calcd for (M+Na)  $\text{C}_{20}\text{H}_{24}\text{O}_5$ : 367.1521, found 367.1530.

***n*-Octyl 2,3-anhydro-5-*O*-benzoyl- $\beta$ -D-lyxofuranoside (17).** The compound was isolated after chromatography (hexanes/EtOAc, 6:1) as a colorless oil:  $R_f$  0.46 (hexanes/EtOAc 3:1);  $[\alpha]_D^{-34.8}$  (c 0.9,  $\text{CHCl}_3$ );  $^1\text{H}$  NMR (500 MHz,  $\text{CDCl}_3$ ,  $\delta$ ) 8.08 (d, 2 H,  $J = 7.1$  Hz), 7.57 (dd, 1 H,  $J = 7.4, 7.3$  Hz), 7.43 (dd, 2 H,  $J = 7.9, 7.6$  Hz), 5.13 (s, 1 H), 4.55 (d, 1 H,  $J = 6.2$  Hz),

4.20 (ddd, 1 H,  $J = 6.2, 6.1, 0.8$  Hz), 3.82–3.78 (m, 2 H) 3.75 (d, 1 H,  $J = 2.9$  Hz), 3.60–3.57 (m, 1 H) 1.65–1.26 (m, 12 H), 0.87 (t, 3 H,  $J = 6.8$  Hz);  $^{13}\text{C}$  NMR (125.7 MHz,  $\text{CDCl}_3$ ,  $\delta$ ) 166.2, 133.1, 129.8, 129.7, 128.4, 101.6, 73.9, 69.8, 63.1, 55.8, 54.8, 31.8, 29.7, 29.3, 29.2, 25.9, 22.6, 14.1,  $J_{\text{C1-H1}} = 164.1$  Hz. HRMS (ESI) calcd for (M+Na)  $\text{C}_{20}\text{H}_{28}\text{O}_5$  371.1829, found 371.1798.

**Cyclohexyl 2,3-anhydro-5-*O*-benzoyl- $\beta$ -D-lyxofuranoside (18).** The compound was isolated after chromatography (hexanes/EtOAc, 6:1) as white solid.  $R_f$  0.42 (hexanes/EtOAc, 3:1);  $[\alpha]_D -57.6^\circ$  ( $c$  1.4,  $\text{CHCl}_3$ ); mp 74–75 °C;  $^1\text{H}$  NMR (500 MHz,  $\text{CDCl}_3$ ,  $\delta$ ) 8.12 (d, 2 H,  $J = 7.1$  Hz), 7.61 (dd, 1 H,  $J = 7.4, 7.3$  Hz), 7.45 (dd, 2 H,  $J = 7.9$  Hz, 7.6 Hz), 5.26 (s, 1 H), 4.59 (dd, 2 H,  $J = 6.0, 3.0$  Hz), 4.22 (ddd, 1 H,  $J = 6.3, 6.2, 0.9$  Hz), 3.80 (dd, 1 H,  $J = 2.9, 0.9$  Hz), 3.75 (d, 1 H,  $J = 2.9$  Hz), 3.75–3.65 (m, 1 H), 1.95–1.18 (m, 10 H);  $^{13}\text{C}$  NMR (125.7 MHz,  $\text{CDCl}_3$ ,  $\delta$ ) 166.2, 133.1, 129.9, 129.7, 128.4, 100.3, 76.7, 73.9, 63.1, 56.4, 54.7, 33.4, 32.4, 25.5, 24.2,  $J_{\text{C1-H1}} = 163.1$  Hz. Anal. Calcd for  $\text{C}_{18}\text{H}_{22}\text{O}_5$ : C, 67.91, 6.97. Found: C, 67.89; H, 7.01.

***t*-Butyl 2,3-anhydro-5-*O*-benzoyl- $\beta$ -D-lyxofuranoside (19).** The compound was isolated after chromatography (hexanes/EtOAc, 8:1) as an oil:  $R_f$  0.52 (hexanes/EtOAc, 4:1);  $[\alpha]_D -61.8^\circ$  ( $c$  1.2,  $\text{CHCl}_3$ );  $^1\text{H}$  NMR (500 MHz,  $\text{CDCl}_3$ ,  $\delta$ ) 8.10 (d, 2 H,  $J = 7.1$  Hz), 7.60 (dd, 1 H,  $J = 7.4, 7.3$  Hz), 7.48 (dd, 2 H,  $J = 7.9, 7.6$  Hz), 5.32 (s, 1 H), 4.62–4.56 (m, 2 H), 4.19 (dd, 1 H,  $J = 6.9, 0.7$  Hz), 3.78 (d, 1 H,  $J = 2.8$  Hz), 3.70 (d, 1 H,  $J = 2.8$  Hz), 1.33 (s, 9 H);  $^{13}\text{C}$  NMR (125.7 MHz,  $\text{CDCl}_3$ ,  $\delta$ ) 166.6, 133.5, 130.3, 130.1, 128.8, 96.9, 76.1, 74.3, 63.5, 57.6, 54.7, 28.9,  $J_{\text{C1-H1}} = 164.5$  Hz. HRMS (ESI) calcd for (M+Na)  $\text{C}_{16}\text{H}_{20}\text{O}_5$  315.1208, found 315.1206.

Also obtained was the corresponding  $\alpha$ -glycoside as an oil:  $R_f$  0.81 (hexanes/EtOAc, 2:1);  $[\alpha]_D +7.1^\circ$  ( $c$  0.7,  $\text{CHCl}_3$ );  $^1\text{H}$  NMR (500 MHz,  $\text{CDCl}_3$ ,  $\delta$ ) 8.07 (d, 2 H,  $J = 7.1$  Hz), 7.56 (dd, 1 H,  $J = 7.4, 7.3$  Hz), 7.45 (dd, 2 H,  $J = 7.9, 7.6$  Hz), 5.38 (s, 1 H), 4.55–4.44 (m, 2 H), 4.34 (dd, 1 H,  $J = 6.0, 5.8$  Hz), 3.81 (d, 1 H,  $J = 2.8$  Hz), 3.58 (d, 1 H,  $J = 2.8$  Hz), 1.28 (s, 9 H).  $^{13}\text{C}$  NMR (125.7 MHz,  $\text{CDCl}_3$ ,  $\delta$ ) 166.1, 141.9, 133.7, 129.9, 129.7, 129.4, 95.9, 75.3, 73.3, 62.8, 54.5, 29.7,  $J_{\text{C1-H1}} = 174.1$  Hz. HRMS (ESI) calcd for (M+Na)  $\text{C}_{16}\text{H}_{20}\text{O}_5$  315.1208, found 315.1204.

**Methyl 5-*O*-(2,3-anhydro-5-*O*-benzoyl- $\beta$ -D-lyxofuranosyl)-2,3-anhydro- $\alpha$ -D-lyxofuranoside (20).** The compound was isolated after chromatography (hexanes/EtOAc, 3:1) as a white solid:  $R_f$  0.29 (hexanes/EtOAc, 1:1); mp 94–95 °C;  $[\alpha]_D -5.4^\circ$  ( $c$  1.5,  $\text{CHCl}_3$ );  $^1\text{H}$  NMR (500 MHz,  $\text{CDCl}_3$ ,  $\delta$ ) 8.06 (dd, 2 H,  $J = 8.5, 0.9$  Hz), 7.56 (ddd, 1 H,  $J = 8.6, 8.6, 1.2$  Hz, 1H), 7.45 (dd, 2 H,  $J = 7.8, 7.6$  Hz), 5.23 (s, 1 H), 4.97 (s, 1 H), 4.57 (dd, 2 H,  $J = 6.4, 0.7$  Hz),

4.25 (dd, 2 H,  $J = 10.4, 5.2$  Hz), 4.02 (dd, 1 H,  $J = 10.4, 5.5$  Hz), 3.86–3.77 (m, 4 H), 3.64 (d, 1 H,  $J = 2.9$  Hz), 3.42 (s, 3 H);  $^{13}\text{C}$  NMR (500 MHz,  $\text{CDCl}_3$ )  $\delta$  166.7, 133.6, 130.2, 128.9, 102.8, 102.2, 75.7, 74.7, 68.2, 63.5, 56.5, 56.2, 56.0, 55.4, 54.6,  $J_{\text{C1-H1}} = 165.9, 172.8$  Hz. Anal. Calcd for  $\text{C}_{18}\text{H}_{20}\text{O}_8$ : C, 59.34, 5.49. Found: C, 59.07; H, 5.52.

***n*-Octyl 5-*O*-(2,3-anhydro-5-*O*-benzoyl- $\beta$ -D-lyxofuranosyl)-2,3-di-*O*-benzoyl- $\alpha$ -D-arabinofuranoside (21).** The compound was isolated after chromatography (hexanes/EtOAc, 4:1) as a clear oil:  $R_f$  0.61 (hexanes/EtOAc, 2:1);  $[\alpha]_D +96.8^\circ$  ( $c$  1.6,  $\text{CHCl}_3$ );  $^1\text{H}$  NMR (500 MHz,  $\text{CDCl}_3$ ,  $\delta$ ) 8.12–8.09 (m, 6 H), 7.61–7.46 (m, 9 H), 5.52 (d, 1 H,  $J = 1.3$  Hz), 5.46 (d, 1 H,  $J = 4.7$  Hz), 5.35 (s, 1 H), 5.30 (s, 1 H), 4.59 (d, 2 H,  $J = 11.0$  Hz), 4.54–4.51 (m, 1 H), 4.32–4.26 (m, 2 H), 4.08 (dd, 1 H,  $J = 11.1, 6.3$  Hz), 3.84 (m, 2 H), 3.57–3.55 (m, 1 H), 1.69–1.29 (m, 12 H), 0.92 (t, 3 H,  $J = 3.6$  Hz);  $^{13}\text{C}$  NMR (125.7 MHz,  $\text{CDCl}_3$ ,  $\delta$ ) 166.2, 165.7, 165.4, 133.4, 133.3, 133.1, 130.1, 129.9, 129.8, 129.7, 129.4, 129.3, 128.5, 128.4, 128.3, 105.7, 101.5, 82.0, 81.6, 77.6, 74.1, 68.2, 67.5, 63.0, 55.7, 54.8, 31.8, 29.6, 29.4, 29.3, 26.2, 22.6, 14.1,  $J_{\text{C1-H1}} = 166.0$  Hz. HRMS (ESI) calcd for  $(\text{M}+\text{Na}) \text{C}_{39}\text{H}_{44}\text{O}_{11}$  711.2776, found 711.2832.

Also obtained was the corresponding  $\alpha$ -glycoside as an oil:  $R_f$  0.76 (hexanes/EtOAc, 2:1);  $[\alpha]_D +31.1^\circ$  ( $c$  0.6,  $\text{CHCl}_3$ );  $^1\text{H}$  NMR (500 MHz,  $\text{CDCl}_3$ ,  $\delta$ ) 8.11–8.08 (m, 6 H), 7.64–7.58 (m, 3 H), 7.50–7.45 (m, 6 H), 5.54 (d, 1 H,  $J = 4.8$  Hz), 5.50 (d, 1 H,  $J = 1.2$  Hz), 5.31 (s, 1 H), 5.28 (s, 1 H), 4.56–4.50 (m, 2 H), 4.44–4.40 (m, 2 H), 4.19 (d, 1 H,  $J = 11.2, 4.3$  Hz), 3.98 (dd, 1 H,  $J = 11.2, 3.4$  Hz), 3.84–3.79 (m, 1 H), 3.72 (d, 1 H,  $J = 2.8$  Hz), 3.67 (d, 1 H,  $J = 2.8$  Hz), 3.59–3.55 (m, 1 H), 1.72–1.29 (m, 12 H), 0.91 (t, 3 H,  $J = 3.5$  Hz).  $^{13}\text{C}$  NMR (125.7 MHz,  $\text{CDCl}_3$ ,  $\delta$ ) 166.6, 166.1, 165.7, 133.9, 133.8, 133.5, 130.3, 130.2, 130.1, 129.9, 129.7, 128.9, 128.8, 128.7, 106.0, 101.9, 82.4, 82.3, 77.1, 74.6, 67.9, 67.4, 63.2, 56.6, 54.4, 32.2, 29.9, 29.8, 29.6, 26.5, 23.0, 14.5,  $J_{\text{C1-H1}} = 173.7$  Hz. HRMS (ESI) calcd for  $(\text{M}+\text{Na}) \text{C}_{39}\text{H}_{44}\text{O}_{11}$  711.2781, found 711.2781.

**Methyl 5-*O*-(2,3-anhydro- $\beta$ -D-lyxofuranosyl)- $\beta$ -D-galactofuranoside (22, de-*O*-benzoylated).** In order to purify the disaccharide from other organic impurities, the benzoyl esters were removed by standard Zemplén deacylation.<sup>2</sup> The compound was isolated after chromatography (CHCl<sub>3</sub>/CH<sub>3</sub>OH, 10:1) as a colorless oil:  $R_f$  0.15 (CHCl<sub>3</sub>/CH<sub>3</sub>OH, 10:1);  $[\alpha]_D -63.2^\circ$  ( $c$  0.9, CH<sub>3</sub>OH);  $^1\text{H}$  NMR (400 MHz, D<sub>2</sub>O,  $\delta$ ) 5.24 (s, 1 H), 4.88 (s, 1 H), 4.15–3.81 (m, 8 H), 3.81–3.63 (m, 3 H), 3.43 (s, 3 H);  $^{13}\text{C}$  NMR (125.7 MHz, D<sub>2</sub>O,  $\delta$ ) 108.7, 103.0, 102.9,

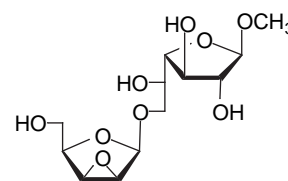

83.9, 81.7, 81.2, 77.6, 77.1, 76.8, 74.8, 71.7, 71.6, 70.9, 69.9, 60.8, 56.4, 56.1, 55.4,  $J_{\text{C1-H1}} = 165.3$  Hz.. HRMS (ESI) calcd for (M+Na)  $\text{C}_{12}\text{H}_{20}\text{O}_9$ : 331.0999, found 331.0978.

**Methyl 6-*O*-(2,3-anhydro- $\beta$ -D-lyxofuranosyl)-2,3,4-tri-*O*-benzyl- $\alpha$ -D-mannopyranoside (23, de-*O*-benzoylated).** In order to purify the disaccharide from other organic impurities, the benzoyl esters were removed by standard Zemplén deacylation.<sup>2</sup> The compound was isolated after chromatography (hexanes/EtOAc, 4:1) as

a colorless oil:  $R_f$  0.55 (hexanes/EtOAc, 2:1);  $[\alpha]_D +26.2^\circ$  ( $c$  2.9,  $\text{CHCl}_3$ );  $^1\text{H}$  NMR (500 MHz,  $\text{CDCl}_3$ ,  $\delta$ ) 7.40–7.26 (m, 15 H), 5.23 (s, 1 H), 4.94 (d, 1 H,  $J = 11$  Hz), 4.76–4.75 (m, 3 H), 4.67 (d, 1 H,  $J = 11.0$

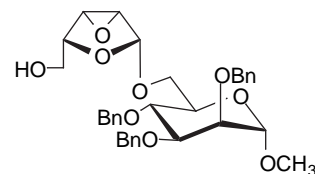

Hz), 4.61 (s, 1 H), 4.10 (dd, 1 H,  $J = 11, 1.4$  Hz), 3.97–3.93 (m, 4 H), 3.67 (dd, 1 H,  $J = 10.1, 2.9$  Hz), 3.34 (s, 3 H), 2.20 (br s, 1 H);  $^{13}\text{C}$  NMR (125.7 MHz,  $\text{CDCl}_3$ ,  $\delta$ ) 138.5, 138.4, 138.1, 128.3, 127.8, 127.6, 127.6, 127.5, 127.4, 101.6, 98.9, 80.7, 76.3, 74.8, 74.7, 74.3, 72.5, 72.0, 71.4, 67.8, 61.7, 55.1, 54.6, 54.4,  $J_{\text{C1-H1}} = 166.0, 166.2$ . HRMS (ESI) calcd for (M+Na)  $\text{C}_{33}\text{H}_{38}\text{O}_9$ : 601.2414, found 601.2432.

**Methyl 6-*O*-(2,3-anhydro-5-*O*-benzoyl- $\beta$ -D-lyxofuranosyl)-2,3,4-tri-*O*-benzyl- $\alpha$ -D-galactopyranoside (24).** The compound was isolated after chromatography (hexanes/EtOAc, 4:1) as a colorless oil:  $R_f$  0.43 (hexanes/EtOAc, 2:1);  $[\alpha]_D +9.1^\circ$  ( $c$  1.0,  $\text{CHCl}_3$ );  $^1\text{H}$  NMR (500 MHz,  $\text{CDCl}_3$ ,  $\delta$ ) 8.10 (dd, 2 H,  $J = 7.4, 7.3$  Hz, 2 H), 7.60 (dd, 1 H,  $J = 7.1, 7.0$  Hz), 7.49–7.30 (m, 17 H), 5.17 (s, 1 H), 5.00 (d, 1 H,  $J = 11.2$  Hz), 4.89 (dd, 2 H,  $J = 11.7, 2.2$  Hz), 4.78–4.68 (m, 4 H), 4.60–4.53 (m, 2 H), 4.25 (ddd, 1 H,  $J = 6.7, 6.7, 6.0$  Hz), 4.09–4.07 (m, 1 H), 4.00–3.98 (m, 3 H), 3.89 (dd, 1 H,  $J = 10.3, 5.5$ , Hz), 3.81–3.78 (m, 2 H), 3.75 (d, 1 H,  $J = 3.0$  Hz), 3.44 (s, 3 H);  $^{13}\text{C}$  NMR (125.7 MHz,  $\text{CDCl}_3$ ,  $\delta$ ) 166.1, 138.7, 138.6, 138.5, 122.1, 129.7, 129.6, 128.3, 128.1, 127.6, 127.5, 127.4, 102.0, 98.8, 79.0, 76.3, 75.3, 74.7, 74.2, 73.5, 73.3, 69.6, 68.9, 63.1, 55.7, 55.3, 54.8;  $J_{\text{C1-H1}} = 166.3, 172.1$ . HRMS (ESI) calcd for (M+Na)  $\text{C}_{40}\text{H}_{42}\text{O}_{10}$ : 705.2676, found 705.2673.

**Methyl 3-*O*-(2,3-anhydro-5-*O*-benzoyl- $\beta$ -D-lyxofuranosyl)-3-*O*-benzyl-4,6-*O*-benzylidene- $\alpha$ -D-glucopyranoside (25).** The compound was isolated after chromatography (hexanes/EtOAc, 4:1) as a white solid:  $R_f$  0.36 (hexanes/EtOAc, 2:1); mp 94–95  $^\circ\text{C}$ ;  $[\alpha]_D -75.0^\circ$  ( $c$  1.3,  $\text{CHCl}_3$ );  $^1\text{H}$  NMR (500 MHz,  $\text{CDCl}_3$ ,  $\delta$ ) 8.09 (dd, 2 H,  $J = 7.4, 7.3$  Hz), 7.57–7.30 (m, 13 H), 5.59 (s, 1 H), 5.40 (s, 1 H), 4.91 (d, 1 H,  $J = 12.1$  Hz), 4.79 (d, 1 H,  $J = 12.1$  Hz), 4.66–4.60 (m, 3 H), 4.33–4.18 (m, 3 H), 3.87–3.50 (m, 7 H), 3.40 (s, 3 H);  $^{13}\text{C}$  NMR (125.7 MHz,  $\text{CDCl}_3$ ,

$\delta$ ) 166.1, 137.9, 137.3, 133.0, 129.7, 129.6, 128.6, 128.5, 128.3, 128.1, 128.0, 127.9, 125.8, 103.7, 100.9, 98.9, 80.1, 78.8, 78.7, 74.2, 73.7, 68.8, 63.0, 62.4, 56.2, 55.3;  $J_{\text{C1-H1}} = 168.0, 163.5$  Hz. HRMS (ESI) calcd for (M+Na)  $\text{C}_{34}\text{H}_{36}\text{O}_{10}$ : 613.2050, found 613.2048.

Also obtained was the corresponding  $\alpha$ -glycoside as a white solid. The  $^1\text{H}$  and  $^{13}\text{C}$  NMR spectra were identical to those previously reported for this compound.<sup>3</sup>

**Methyl 5-*O*-(2,3-anhydro-5-*O*-benzoyl- $\beta$ -D-lyxofuranosyl)-2,3-anhydro- $\alpha$ -D-lyxofuranosyl]-2,3-anhydro- $\alpha$ -D-lyxofuranoside (26).** The compound was isolated after chromatography (hexanes/EtOAc, 2:1) as white solid.  $R_f$  0.18 (hexanes/EtOAc, 1:1);  $[\alpha]_D +11.8^\circ$  ( $c$  0.9,  $\text{CHCl}_3$ ); mp 123–124  $^\circ\text{C}$ ;  $^1\text{H}$  NMR (500 MHz,  $\text{CDCl}_3$ ,  $\delta$ ) 8.10 (dd, 2 H,  $J = 7.4, 7.3$  Hz), 7.61 (d, 1 H,  $J = 7.3$  Hz), 7.48 (dd, 2 H,  $J = 7.8, 7.6$  Hz), 5.26 (s, 1 H), 5.17 (s, 1 H), 4.98 (s, 1 H), 4.60 (d, 2 H,  $J = 6.1$  Hz), 4.33–4.27 (m, 2 H), 4.20 (dd, 1 H,  $J = 7.1, 5.6$  Hz), 4.04 (dd, 1 H,  $J = 10.5, 5.6$  Hz), 3.94 (dd, 1 H,  $J = 10.5, 5.6$  Hz), 3.85 (dd, 1 H,  $J = 10.5, 6.6$  Hz), 3.83 (br s, 3 H), 3.78 (d, 1 H,  $J = 2.9$  Hz), 3.74–3.70 (m, 3 H);  $^{13}\text{C}$  NMR (125.7 MHz,  $\text{CDCl}_3$ ,  $\delta$ ) 166.2, 133.1, 129.8, 129.7, 128.8, 102.2, 101.8, 101.7, 75.5, 74.6, 74.3, 67.6, 66.4, 63.0, 56.3, 56.1, 55.8, 55.6, 54.9, 54.2, 54.1,  $J_{\text{C1-H1}} = 166.9, 174.3, 173.7$  Hz. HRMS (ESI) calcd for (M+Na)  $\text{C}_{23}\text{H}_{26}\text{O}_{11}$ : 501.1373, found 501.1372.

**Methyl 3-*O*-(2,3-anhydro-5-*O*-benzoyl- $\beta$ -D-lyxofuranosyl)-2,4,6-tri-*O*-benzyl- $\alpha$ -D-gulopyranoside (27).** The compound was isolated after chromatography in (hexanes/EtOAc, 1:1) as a colorless oil:  $R_f$  0.26 (hexanes/EtOAc, 2:1);  $[\alpha]_D +26.1^\circ$  ( $c$  1.2,  $\text{CHCl}_3$ );  $^1\text{H}$  NMR (500 MHz,  $\text{CDCl}_3$ ,  $\delta$ ) 8.10 (d, 2 H,  $J = 8.0$  Hz), 7.61 (dd, 1 H,  $J = 7.3, 7.3$  Hz), 7.48–7.26 (m, 17 H), 5.45 (s, 1 H), 4.94 (dd, 1 H,  $J = 3.7, 3.7$  Hz), 4.80–4.77 (m, 2 H), 4.73 (d, 1 H,  $J = 3.9$  Hz), 4.70 (d, 1 H,  $J = 3.4$  Hz), 4.60 (d, 2 H,  $J = 6.0$  Hz), 4.47 (d, 1 H,  $J = 12.0$  Hz), 4.45 (d, 1 H,  $J = 12.0$  Hz), 4.35 (dd, 1 H,  $J = 6.7, 5.7$  Hz), 4.22 (dd, 1 H,  $J = 6.0, 5.8$  Hz), 3.88–3.83 (m, 2 H), 3.81–3.79 (m, 2 H), 3.60 (dd, 1 H,  $J = 9.9, 2.9$  Hz), 3.48 (s, 3 H);  $^{13}\text{C}$  NMR (125.7 MHz,  $\text{CDCl}_3$ ,  $\delta$ ) 166.6, 138.8, 138.5, 133.6, 130.1, 128.9, 128.8, 128.7, 128.4, 128.3, 128.2, 128.0, 127.8, 101.0, 98.6, 77.3, 73.7, 72.8, 72.2, 71.9, 69.9, 68.6, 65.5, 63.3, 56.2, 55.7, 54.0,  $J_{\text{C1-H1}} = 169.9, 164.9$  Hz. HRMS (ESI) calcd for (M+Na)  $\text{C}_{40}\text{H}_{42}\text{O}_{10}$ : 705.2676, found 705.2654.

Also obtained was the corresponding  $\alpha$ -glycoside as an oil:  $R_f$  0.40 (hexanes/EtOAc, 2:1);  $^1\text{H}$  NMR (500 MHz,  $\text{CDCl}_3$ ,  $\delta$ ) 8.10 (d, 2 H,  $J = 8.0$  Hz), 7.61 (dd, 1 H,  $J = 7.3, 7.3$  Hz), 7.48–7.26 (m, 17 H), 5.37 (s, 1 H), 4.77 (d, 1 H,  $J = 3.9$  Hz), 4.68–4.60 (m, 2 H), 4.57–4.45 (m, 4 H), 4.26–4.23 (m, 2 H), 4.07 (dd, 1 H,  $J = 3.3, 3.3$  Hz), 3.92 (d, 1 H, 2.8 Hz), 3.83–3.81 (m, 2



H), 3.67 (d, 1 H,  $J = 2.5$  Hz), 3.62–3.54 (m, 2H), 3.45 (s, 3 H).  $^{13}\text{C}$  NMR (125.7 MHz,  $\text{CDCl}_3$ ,  $\delta$ ) 166.5, 138.6, 138.1, 133.6, 130.2, 130.1, 128.9, 128.8, 128.7, 128.6, 128.5, 128.5, 128.0, 127.9, 103.1, 98.7, 76.6, 74.3, 73.8, 73.2, 72.9, 72.1, 72.0, 69.5, 65.6, 63.2, 56.8, 56.3, 54.6. HRMS (ESI) calcd for (M+Na)  $\text{C}_{40}\text{H}_{42}\text{O}_{10}$ : 705.2676, found 705.2651.

**Methyl 2-O-(2,3-anhydro-5-O-benzoyl- $\beta$ -D-lyxofuranosyl)-3,5-di-O-benzyl- $\alpha$ -D-arabinofuranoside (28).** The compound was isolated after chromatography in (hexanes/EtOAc, 2:1) as a colorless oil:  $R_f$  0.22 (hexanes/EtOAc, 2:1);  $[\alpha]_D +19.6^\circ$  ( $c$  1.9,  $\text{CHCl}_3$ );  $^1\text{H}$  NMR (500 MHz,  $\text{CDCl}_3$ ,  $\delta$ ) 8.10 (d, 2 H,  $J = 8.0$  Hz), 7.58–7.28 (m, 13 H), 5.28 (s, 1 H), 5.03 (s, 1 H), 4.77 (d, 1 H,  $J = 11.9$  Hz), 4.62–4.55 (m, 5 H), 4.43 (d, 1 H,  $J = 2.8$  Hz), 4.28 (dd, 1 H,  $J = 6.0, 6.0$  Hz), 4.25–4.23 (m, 1 H), 4.05 (dd, 1 H,  $J = 6.6, 3.3$  Hz), 3.84 (d, 1 H,  $J = 2.8$  Hz), 3.77 (d, 1 H,  $J = 2.8$  Hz), 3.69–3.61 (m, 2 H), 3.45 (s, 3 H);  $^{13}\text{C}$  NMR (125.7 MHz,  $\text{CDCl}_3$ ,  $\delta$ ) 166.6, 138.5, 138.3, 133.6, 130.1, 128.8, 128.7, 128.4, 128.1, 128.0, 127.9, 108.2, 101.6, 87.6, 83.7, 81.3, 75.0, 73.8, 72.5, 70.2, 63.5, 56.5, 55.4, 55.3,  $J_{\text{C1-H1}} = 172.5, 164.2$  Hz. HRMS (ESI) calcd for (M+Na)  $\text{C}_{32}\text{H}_{34}\text{O}_9$ : 585.2101, found 585.2095.

Also obtained was the corresponding  $\alpha$ -glycoside as an oil:  $R_f$  0.38 (hexanes/EtOAc, 2:1);  $[\alpha]_D +34.0^\circ$  ( $c$  0.5,  $\text{CHCl}_3$ );  $^1\text{H}$  NMR (500 MHz,  $\text{CDCl}_3$ ,  $\delta$ ) 8.11 (d, 2 H,  $J = 8.0$  Hz), 7.55 (dd, 1 H,  $J = 7.8, 7.5$  Hz), 7.5–7.3 (m, 12 H), 5.04 (s, 1 H), 4.97 (s, 1 H), 4.63 (d, 1 H,  $J = 2.9$  Hz), 4.60 (d, 1 H,  $J = 7.8$  Hz), 4.55 (dd, 1 H,  $J = 6.0, 1.4$  Hz), 4.35 (dd, 1 H,  $J = 5.9, 5.5$  Hz), 4.23–4.21 (m, 1 H), 4.17 (dd, 1 H,  $J = 2.4, 0.5$  Hz), 3.88 (dd, 1 H,  $J = 6.3, 2.4$  Hz), 3.80 (d, 1 H,  $J = 2.8$  Hz), 3.68–3.61 (m, 2 H), 3.56 (d, 1 H,  $J = 2.8$  Hz), 3.52 (d, 1 H,  $J = 2.7$  Hz), 3.40 (s, 3 H).  $^{13}\text{C}$  NMR (125.7 MHz,  $\text{CDCl}_3$ ,  $\delta$ ) 166.6, 138.4, 138.1, 133.6, 130.2, 130.1, 128.9, 128.8, 128.7, 128.6, 128.3, 128.2, 128.1, 108.4, 101.3, 87.5, 83.8, 81.1, 74.6, 73.8, 72.8, 69.8, 63.2, 56.5, 55.5, 54.4,  $J_{\text{C1-H1}} = 172.5, 174.1$  Hz. HRMS (ESI) calcd for (M+Na)  $\text{C}_{32}\text{H}_{34}\text{O}_9$ : 585.2101, found 585.2098.

***n*-Octyl 5-O-(3-O-acetyl-5-O-benzoyl-2-deoxy-2-*p*-thiocresyl- $\beta$ -D-xylofuranosyl)-2,3-di-O-benzoyl- $\alpha$ -D-arabinofuranoside (29, 3'-O-Acetate)** This

compound and the  $\alpha$ -isomer of **21** had the same  $R_f$ . Separation required acetylation ( $\text{Ac}_2\text{O}$ , pyridine) of the mixture followed by chromatography (hexanes/EtOAc, 4:1) which provided the

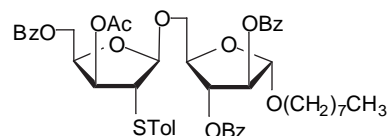

compound as a colorless oil:  $R_f$  0.21 (hexanes/EtOAc, 3:1);  $[\alpha]_D -21.6^\circ$  ( $c$  0.7,  $\text{CHCl}_3$ );  $^1\text{H}$  NMR (500 MHz,  $\text{CDCl}_3$ ,  $\delta$ ) 8.12–8.04 (m, 6 H), 7.65–7.55 (m, 3 H), 7.56–7.38 (m, 6 H), 7.37 (d, 2 H,

$J = 7.9$  Hz), 7.13 (d, 2 H,  $J = 7.9$  Hz), 5.49 (d, 1 H,  $J = 1.2$  Hz), 5.41 (d, 1 H,  $J = 4.7$  Hz), 4.38 (dd, 1 H,  $J = 5.8, 3.4$  Hz), 5.27 (s, 2 H), 4.78 (dd, 1 H,  $J = 12.0, 5.9$  Hz), 4.64–4.50 (m, 2 H), 4.46–4.43 (m, 1 H), 4.19 (d, 1 H,  $J = 10.9, 3.6$  Hz), 3.85 (dd, 1 H,  $J = 10.9, 6.1$  Hz), 3.80 (dd, 1 H,  $J = 3.3, 1.7$  Hz), 3.79–3.72 (m, 1 H), 3.54–3.49 (m, 1 H), 2.34 (s, 3 H), 1.98 (s, 3 H), 1.69–1.62 (m, 2 H), 1.44–1.29 (m, 10 H), 0.91 (t, 3 H,  $J = 3.6$  Hz);  $^{13}\text{C}$  NMR (125.7 MHz,  $\text{CDCl}_3$ ,  $\delta$ ) 170.4, 166.5, 166.1, 165.7, 138.4, 133.8, 133.7, 132.9, 130.3, 130.2, 130.1, 130.1, 130.0, 130.0, 129.8, 129.7, 129.4, 128.9, 128.8, 128.7, 108.3, 106.1, 96.2, 82.4, 82.2, 78.3, 78.2, 76.9, 76.2, 68.2, 67.9, 63.9, 56.5, 32.2, 30.0, 29.9, 29.7, 26.6, 23.1, 21.5, 21.1, 14.5. HRMS (ESI) calcd for (M+Na)  $\text{C}_{48}\text{H}_{54}\text{O}_{12}\text{S}$ : 877.3234, found 877.3234.

**Methyl 3-*O*-(2-deoxy-2-*p*-thiocresyl- $\beta$ -D-xylofuranosyl)-2-*O*-benzyl-4,6-*O*-benzylidene- $\alpha$ -D-glucopyranoside (30, de-*O*-benzoylated).** This

compound and the  $\alpha$ -isomer of **25** had the same  $R_f$ . Separation required debenzoylation<sup>2</sup> of the mixture followed by chromatography (hexanes/EtOAc, 3:1), which provided the

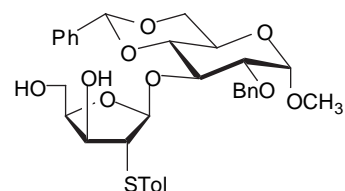

compound as a white solid:  $R_f$  0.20 (hexanes/EtOAc, 2:1);  $[\alpha]_D -29.5^\circ$  ( $c$  1.0,  $\text{CHCl}_3$ ); mp 159–160  $^\circ\text{C}$ ,  $^1\text{H}$  NMR (500 MHz,  $\text{CDCl}_3$ ,  $\delta$ ) 7.54 (d, 2 H,  $J = 7.8$  Hz), 7.42–7.31 (m, 10 H), 7.11 (d, 2 H,  $J = 7.7$  Hz), 5.61 (s, 1 H), 5.52 (s, 1 H), 4.63 (d, 1 H,  $J = 12.2$  Hz), 4.58 (d, 1 H,  $J = 3.6$  Hz), 4.51 (d, 1 H,  $J = 2.1$  Hz), 4.39–4.24 (m, 6 H), 3.89 (ddd, 1 H,  $J = 10.0, 4.9, 4.8$  Hz), 3.76–3.69 (m, 2 H), 3.61–3.47 (m, 4 H), 3.42 (s, 3 H), 2.31 (s, 3 H);  $^{13}\text{C}$  NMR (125.7 MHz,  $\text{CDCl}_3$ ,  $\delta$ ) 138.0, 137.9, 136.9, 132.3, 131.3, 130.4, 130.3, 129.9, 129.3, 128.9, 128.8, 128.6, 128.5, 126.9, 108.4, 102.9, 99.1, 82.7, 80.4, 80.2, 75.2, 73.5, 69.4, 61.9, 61.6, 59.9, 55.9, 22.9. HRMS (ESI) calcd for (M+Na)  $\text{C}_{33}\text{H}_{38}\text{O}_9\text{S}$ : 633.2134, found 633.2136.

**Methyl 3-*O*-(2-deoxy-2-*p*-thiocresyl-3,5-di-*O*-benzoyl- $\beta$ -D-xylofuranosyl)-2,4,6-tri-*O*-benzyl- $\alpha$ -D-gulopyranoside (31, 3'-*O*-benzoate).** This compound and

the  $\alpha$ -isomer of **27** had the same  $R_f$ . Separation required benzylation (BzCl, pyridine) of the mixture followed by chromatography (hexanes/EtOAc, 4:1), which provided the product as a colorless oil:  $R_f$

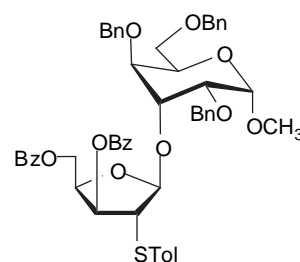

0.50 (hexanes/EtOAc, 2:1);  $^1\text{H}$  NMR (500 MHz,  $\text{CDCl}_3$ ,  $\delta$ ) 8.09–8.07 (m, 4 H), 7.45–7.29 (m, 23 H), 7.06 (d, 2 H,  $J = 8.2$  Hz), 5.18 (s, 1 H), 5.11 (d, 1 H,  $J = 3.2$  Hz), 4.88 (dd, 1 H,  $J = 11.9, 3.4$  Hz), 4.73–4.53 (m, 6 H), 4.33 (dd, 1 H,  $J = 3.4, 3.4$  Hz), 4.21–4.19 (m, 3 H), 3.94 (dd, 1 H,  $J = 4.2, 3.3$  Hz), 3.83 (dd, 1 H,  $J = 3.8, 3.8$  Hz), 3.75 (d, 1 H,  $J = 2.8$  Hz), 3.69

(d, 1 H,  $J = 2.8$  Hz), 3.63–3.52 (m, 3 H), 3.43 (s, 3 H), 2.27 (s, 3 H);  $^{13}\text{C}$  NMR (125.7 MHz,  $\text{CDCl}_3$ ,  $\delta$ ) 166.6, 166.5, 138.2, 138.1, 137.9, 137.8, 134.0, 133.5, 132.0, 130.6, 130.3, 130.2, 130.1, 128.9, 128.8, 128.7, 128.6, 128.5, 128.4, 128.3, 128.0, 127.9, 100.6, 98.7, 80.8, 79.3, 74.9, 73.7, 73.1, 70.2, 69.6, 65.1, 63.4, 56.2, 56.0, 55.9, 55.3, 21.5. HRMS (ESI) calcd for  $(\text{M}+\text{Na})$   $\text{C}_{54}\text{H}_{54}\text{O}_{11}\text{S}$ : 933.3285, found 933.3281.

**Methyl 2-*O*-(2-deoxy-2-*p*-thiocresyl- $\beta$ -D-xylofuranosyl)-3,5-di-*O*-benzyl- $\alpha$ -D-arabinofuranoside (32, de-*O*-benzoylated).** This compound and the  $\alpha$ -

isomer of **28** had the same  $R_f$ . Separation required debenzoylation<sup>2</sup> of the mixture followed by chromatography (hexanes/EtOAc, 3:2), which provided the compound as a colorless oil:  $R_f$  0.40 (hexanes/EtOAc, 3:2);

$[\alpha]_D +12.3^\circ$  ( $c$  0.6,  $\text{CHCl}_3$ );  $^1\text{H}$  NMR (500 MHz,  $\text{CDCl}_3$ ,  $\delta$ ) 7.43–7.32 (m, 12 H), 7.18 (d, 2 H,  $J = 7.9$  Hz), 5.19 (s, 1 H), 4.83 (s, 1 H), 4.69 (d,

1 H,  $J = 11.8$  Hz), 4.62 (d, 1 H,  $J = 12.1$  Hz), 4.55 (d, 2 H,  $J = 12.2$  Hz), 4.41 (dd, 1 H,  $J = 4.9$ , 3.3 Hz), 4.29–4.26 (m, 2 H), 4.19–4.18 (m, 1 H), 4.12 (dd, 1 H,  $J = 6.1$ , 5.0 Hz), 3.86 (m, 2 H), 3.72 (s, 1 H), 3.66–3.55 (m, 4 H), 3.43 (dd, 1 H,  $J = 11.1$ , 8.0 Hz), 3.39 (s, 3 H), 2.36 (s, 3 H);  $^{13}\text{C}$  NMR (125.7 MHz,  $\text{CDCl}_3$ ,  $\delta$ ) 138.3, 138.1, 138.0, 132.4, 130.5, 129.9, 128.8, 128.7, 128.3, 128.2, 128.1, 126.7, 107.8, 107.7, 86.7, 83.3, 82.6, 81.6, 77.2, 73.9, 72.5, 69.6, 62.3, 59.3, 55.4, 21.5. HRMS (ESI) calcd for  $(\text{M}+\text{Na})$   $\text{C}_{32}\text{H}_{38}\text{O}_8\text{S}$ : 605.2185, found 605.2183.

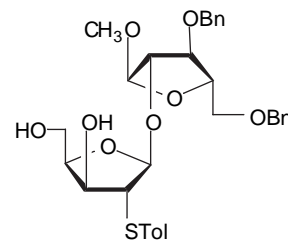

1. **8:** Martin, M. G.; Ganem, B.; Rasmussen, J. R. *Carbohydr. Res.* **1983**, *123*, 332.  
**9:** McCarren, P. R.; Gadikota, R. R.; Lowary, T. L. Manuscript in Preparation.  
**10:** Choudhury, A. K.; Roy, N. *Carbohydr. Res.* **1998**, *308*, 207.  
**11:** Sondheimer, S. J.; Eby, R.; Schuerch, C. *Carbohydr. Res.* **1978**, *60*, 187.  
**12:** Ek, M.; Garegg, P. J.; Hultberg, H.; Oscarson, S. *J. Carbohydr. Chem.* **1983**, *2*, 305.  
**13:** Dasgupta, F.; Garegg, P. J. *Synthesis* **1994**, 1121.  
**15:** Mullard, L. A.; Kovac, P.; Glaudemans, C. P. J. *Carbohydr. Res.* **1994**, *259*, 21.
2. Thompson, A.; Wolfrom, M. L. *Methods Carbohydr. Chem.* **1963**, *2*, 215.
3. Callam, C. S.; Gadikota, R. R.; Lowary, T. L. *J. Org. Chem.* Submitted.
4. Wright, J. A.; Taylor, N. F. *Carbohydr. Res.* **1967**, *3*, 333.

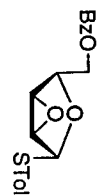

2

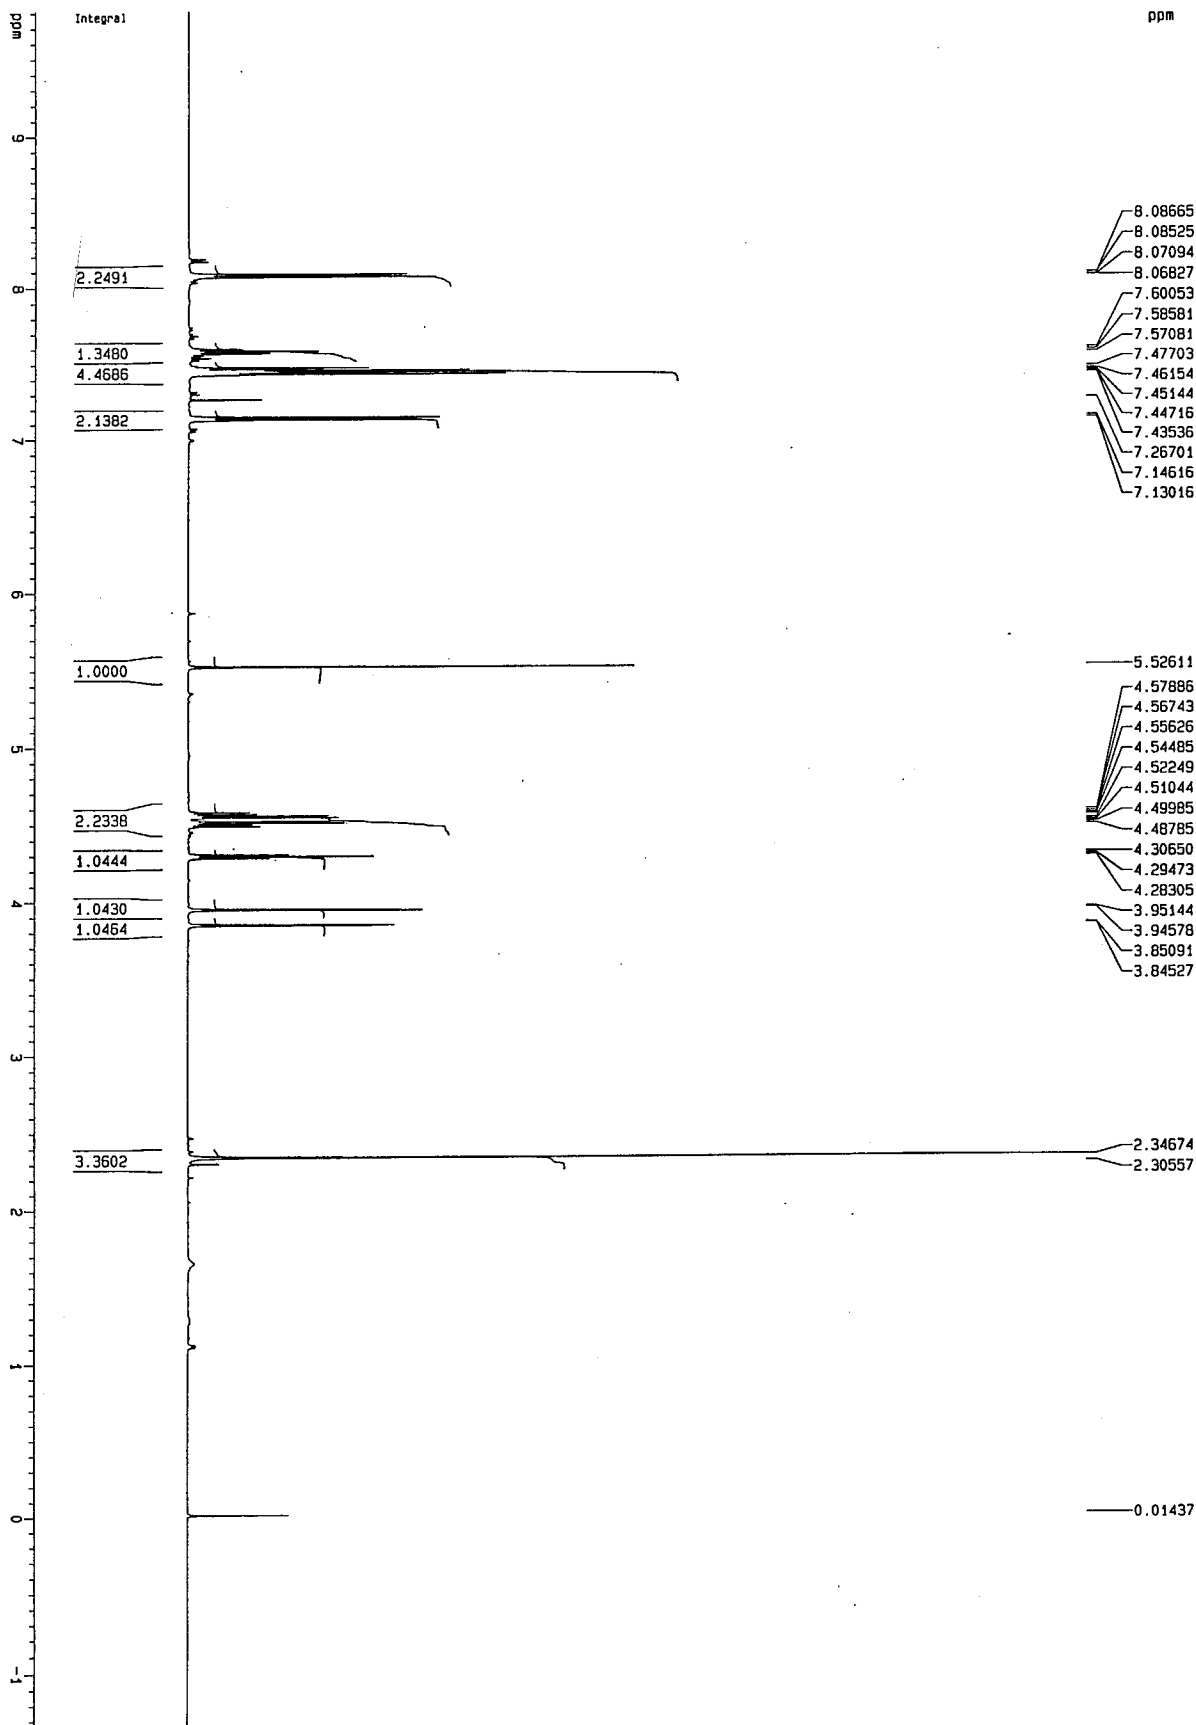

Current Data Parameters  
NAME Coupled final  
EXPNO 100  
PROCNO 1  
F2 - Acquisition Parameters  
Date\_ 20000726  
Time 9.08  
INSTRUM spect  
PROBHD 5 mm BBO BB-1  
PULPROG zg30  
TD 65536  
SOLVENT CDCl3  
NS 5  
DS 2  
SWH 10330.578 Hz  
FIDRES 0.157632 Hz  
AQ 3.1719823 sec  
RG 128  
DM 48.400 usec  
DE 5.00 usec  
TE 300.0 K  
D1 1.0000000 sec  
\*\*\*\*\* CHANNEL f1 \*\*\*\*\*  
NUC1 1H  
P1 13.70 usec  
PL1 -1.00 dB  
SFO1 500.135085 MHz  
F2 - Processing parameters  
SI 32768  
SF 500.1350250 MHz  
WDW EM  
SSB 0  
LB 0.30 Hz  
GB 0  
PC 1.00  
ID NMR plot parameters  
CX 34.00 cm  
FLP 9.812 ppm  
F1 4907.15 Hz  
FAP -1.342 ppm  
F2 -671.13 Hz  
PPHCH 0.32805 ppm/cm  
HZCH 154.05723 Hz/cm

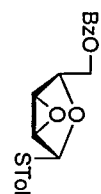

2

ppm

166.040

138.233  
133.208  
133.058  
129.775  
129.611  
129.586  
128.463  
128.274

87.005

77.163  
76.909  
76.655  
74.041

62.218  
57.487  
55.513

21.012

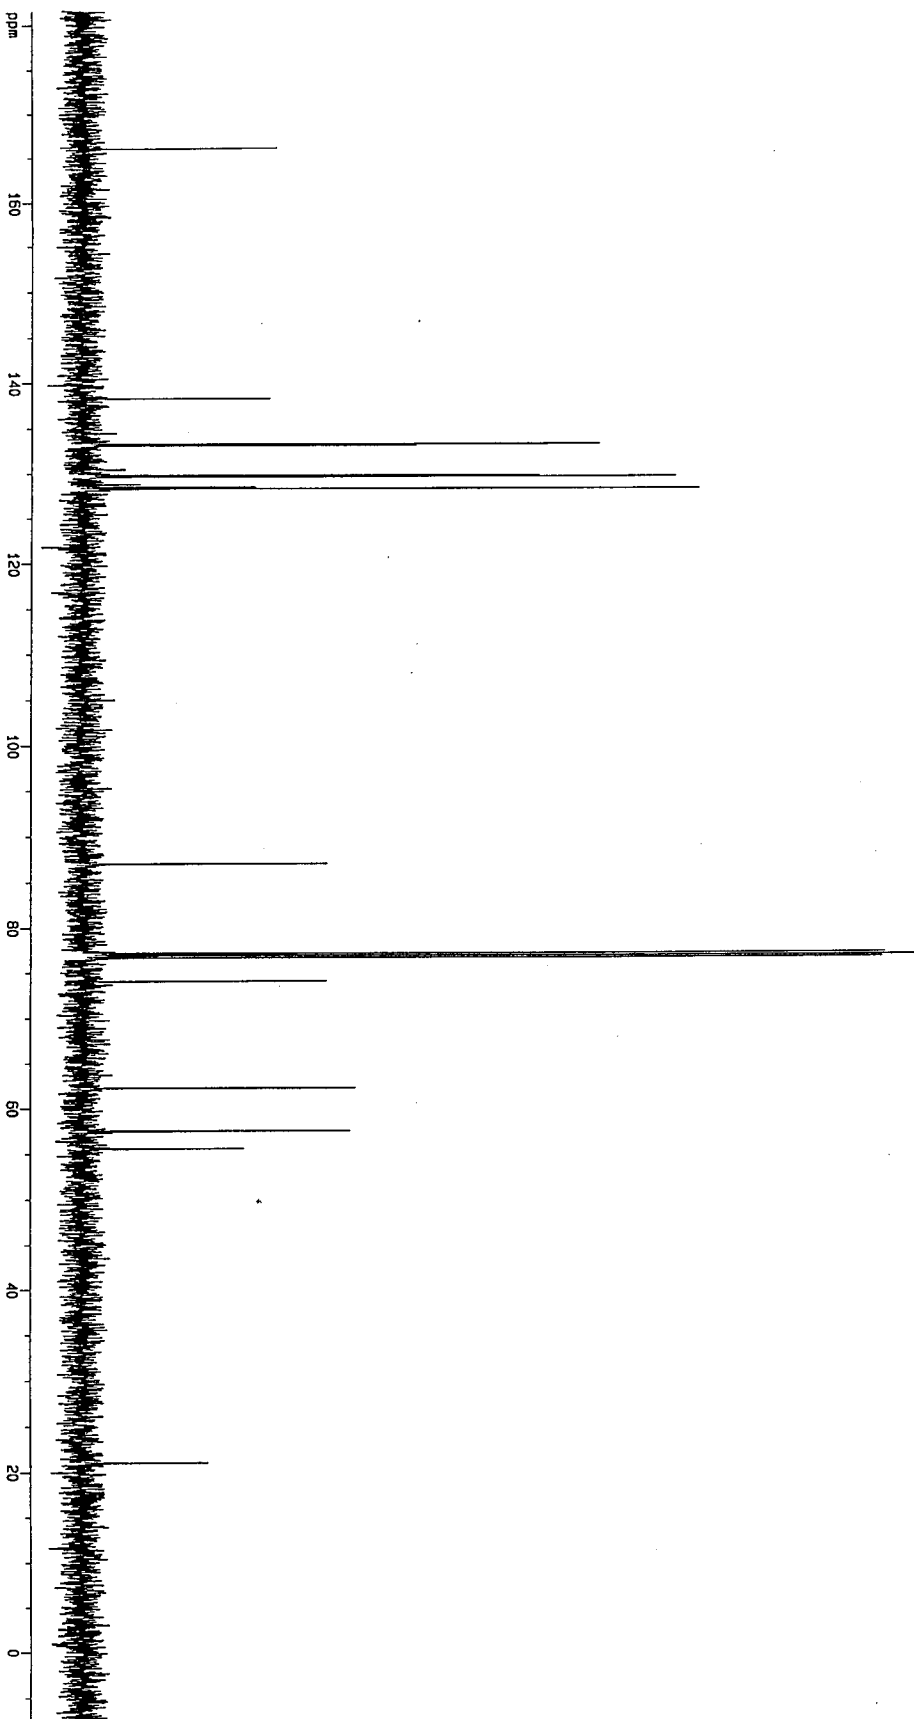

Current Data Parameters  
NAME CoupledFinal  
EXPNO 101  
PROCNO 1  
F2 - Acquisition Parameters  
Date\_ 2000/07/26  
Time 9.14  
INSTRUM spect  
PROBHD 5 mm BBO BB-1  
PULPROG zgpg30  
TD 65536  
SOLVENT CDCl3  
NS 23  
DS 4  
SWH 31446.541 Hz  
FIDRES 0.479836 Hz  
AQ 1.0420724 sec  
RG 8192  
DM 15.900 usec  
DE 6.00 usec  
TE 300.0 K  
D1 2.00000000 sec  
D11 0.03000000 sec  
D12 0.00000000 sec

===== CHANNEL f1 =====  
NUC1 13C  
P1 8.00 usec  
PL1 3.00 dB  
SF01 125.775719 MHz

===== CHANNEL f2 =====  
CPDPRG2 waltz16  
NUC2 1H  
P2 100.00 usec  
PL2 -1.00 dB  
SF02 500.136005 MHz  
RG 18.80 dB  
DM 18.80 dB  
DE 6.00 usec  
TE 300.0 K  
D1 2.00000000 sec  
D11 0.03000000 sec  
D12 0.00000000 sec

F2 - Processing parameters  
SI 32768  
SF 123.757817 MHz  
WDW EM  
SSB 0  
LB 1.00 Hz  
GB 0  
PC 1.40

10 NMR plot parameters  
CX 34.00 cm  
FLP 181.570 ppm  
F1 22833.88 Hz  
F2 -7.684 ppm  
PPMCH 5.56630 ppm/Kcm  
HZCM 700.00513 Hz/Kcm

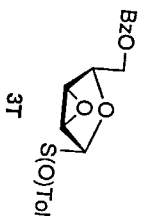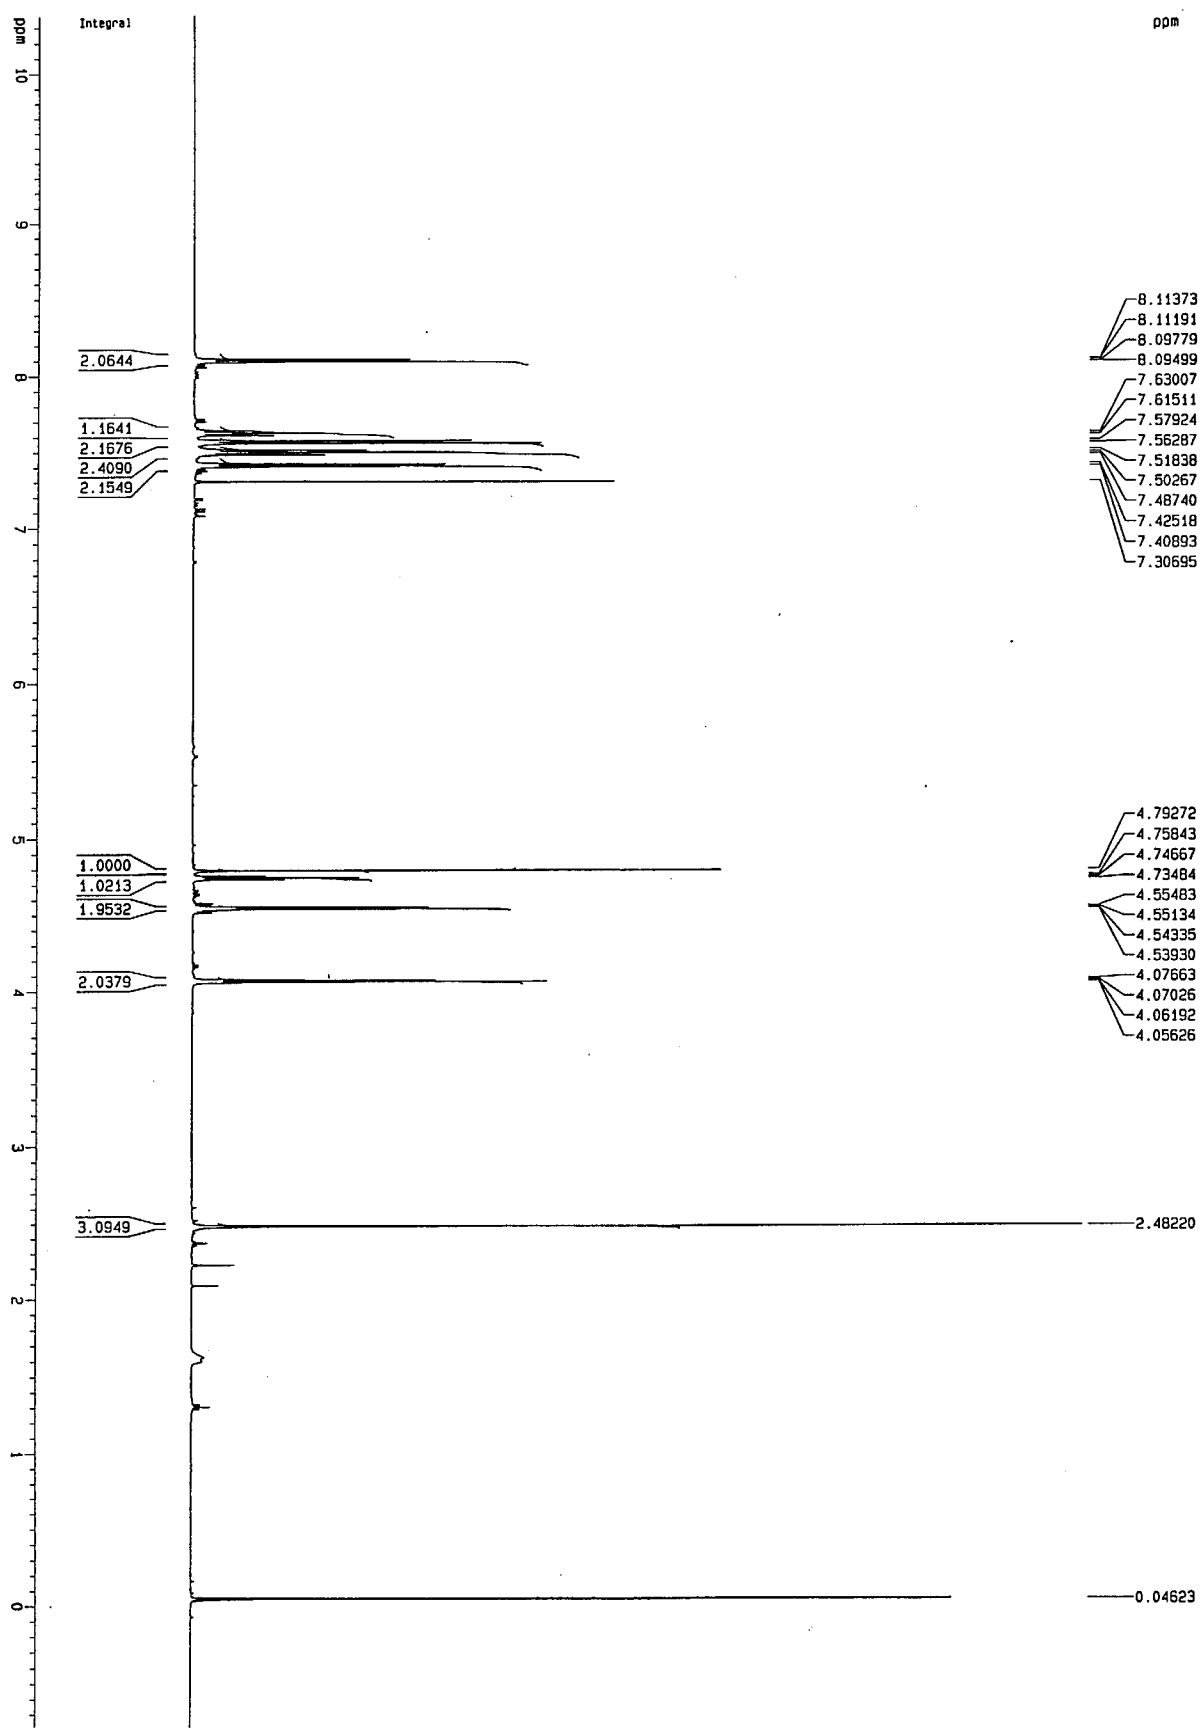

Current Data Parameters  
NAME CSC-5-7-00  
EXPNO 10  
PROCNO 1

F2 - Acquisition Parameters  
Date\_ 20000907  
Time 8.13  
INSTRUM spect  
PROBHD 5 mm BBO BB-1  
PULPROG zg30  
TO 2930  
SOLVENT CDCl3  
NS 65  
DS 2  
SWH 10330.578 Hz  
FIDRES 0.157632 Hz  
AQ 3.719923 sec  
RG 362  
DM 48.400 usec  
DE 6.00 usec  
TE 300.0 K  
D1 1.00000000 sec

===== CHANNEL f1 =====  
NUC1 1H  
P1 13.70 usec  
PL1 -1.00 dB  
SFO1 500.1330085 MHz

F2 - Processing parameters  
SI 32768  
SF 500.1330000 MHz  
WDW EM  
SSB 0  
LB 0.30 Hz  
GB 0  
PC 1.00

1D NMR plot parameters  
CX 34.00 cm  
F1P 10.372 ppm  
F1 5187.44 Hz  
F2P -0.781 ppm  
F2 -390.85 Hz  
PPHOM 0.32805 ppm/cm  
HZCM 164.06723 Hz/cm

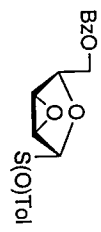

3T

ppm

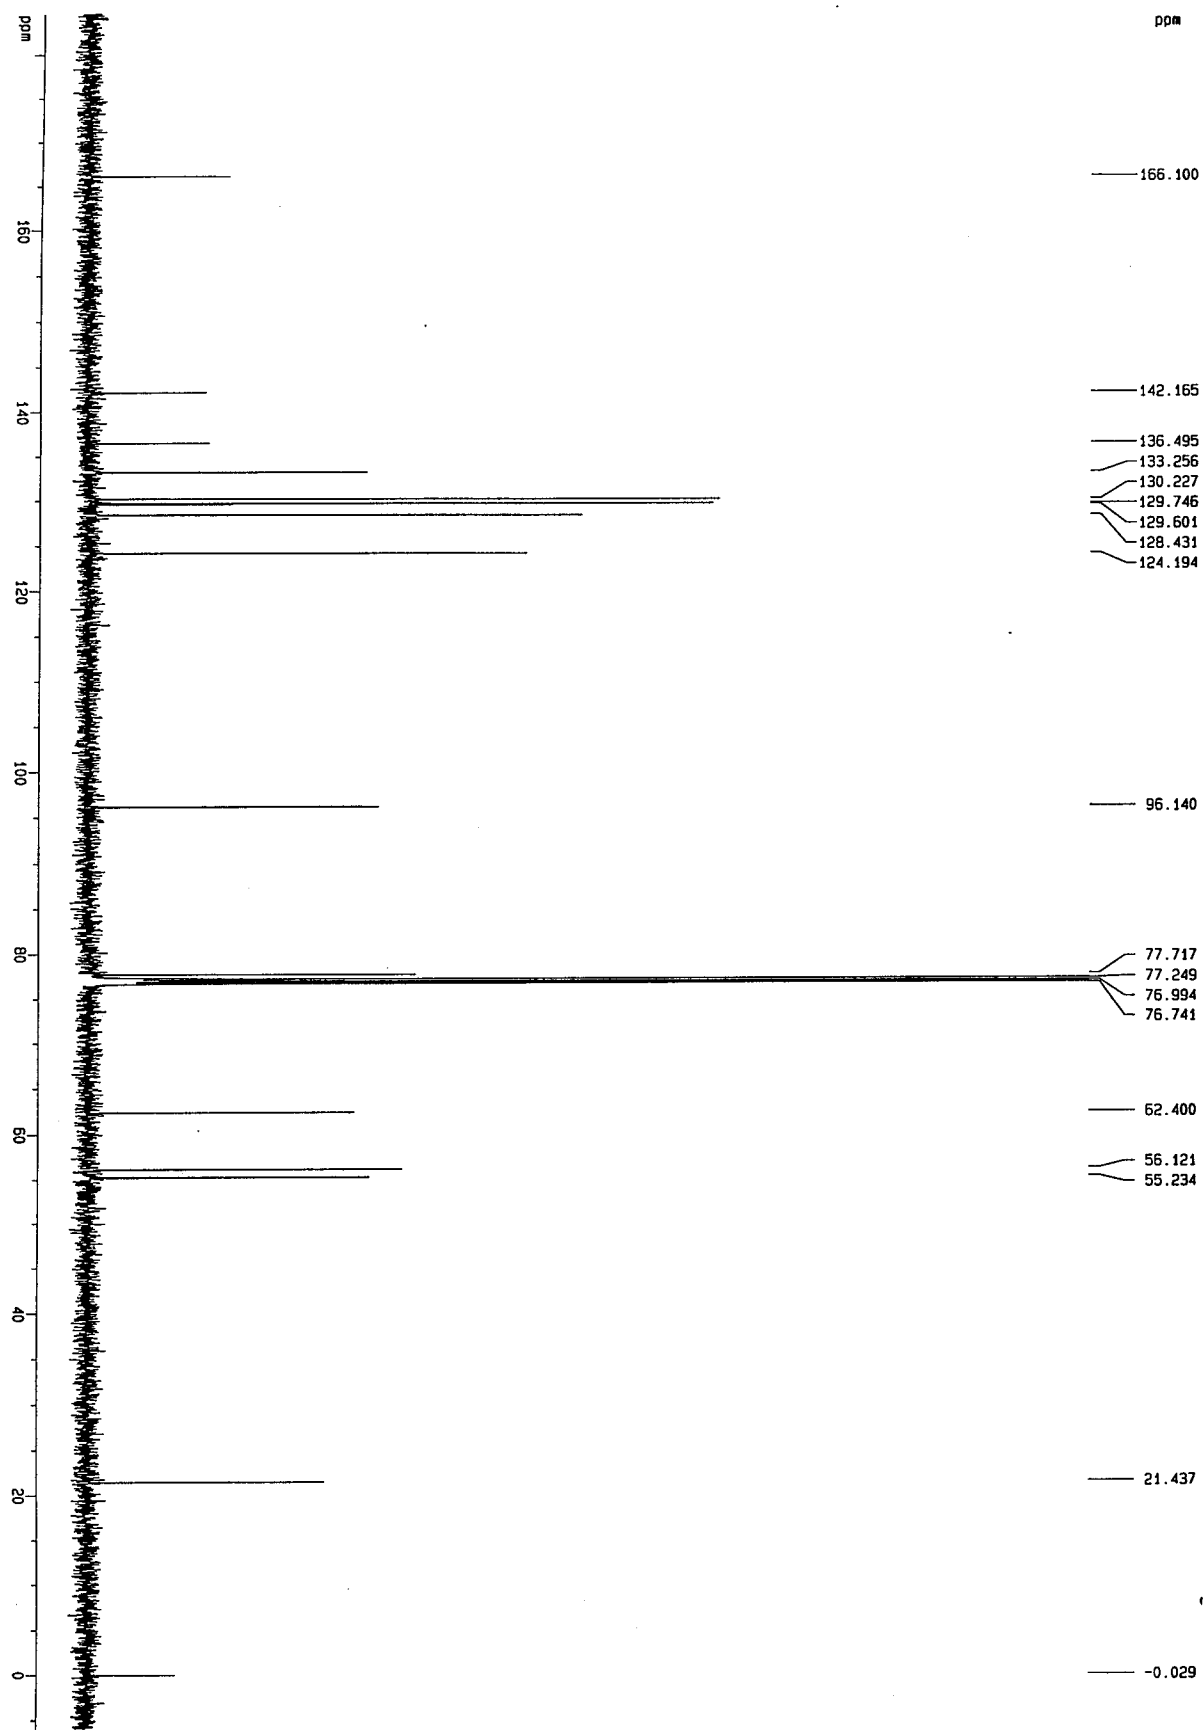

Current Data Parameters  
NAME CSC-9-7-00  
EXPNO 11  
PROCNO 1

F2 - Acquisition Parameters  
Date\_ 20000907  
Time 8.23

INSTRUM spect  
PROBHD 5 mm BBO BB-1  
PULPROG zgpg30  
TD 65536  
SOLVENT CDCl3  
NS 850  
DS 4

SWH 31446.541 Hz  
FIDRES 0.479836 Hz  
AQ 1.0420724 sec  
RG 16384  
DM 15.300 usec  
DE 6.00 usec  
TE 300.0 K  
D1 2.00000000 sec  
D11 0.03000000 sec  
D12 0.00020000 sec

===== CHANNEL f1 =====  
NUC1 13C  
P1 8.00 usec  
PL1 3.00 dB  
SF01 125.7715719 MHz

===== CHANNEL f2 =====  
NAME2 1H  
PCPD2 100.00 usec  
PL2 -1.00 dB  
PL12 18.80 dB  
PL13 18.80 dB  
SF02 500.1320055 MHz

F2 - Processing parameters  
SI 32768  
SF 125.7577946 MHz  
WDW EM  
SSB 0  
LB 1.00 Hz  
GB 0  
PC 1.40

1D NMR plot parameters  
CX 34.00 cm  
F1P 184.462 DPM  
F1 23197.49 Hz  
F2P -5.888 DPM  
F2 -740.45 Hz  
PPHCH 5.59852 DPM/cm  
HZCH 704.05731 Hz/cm

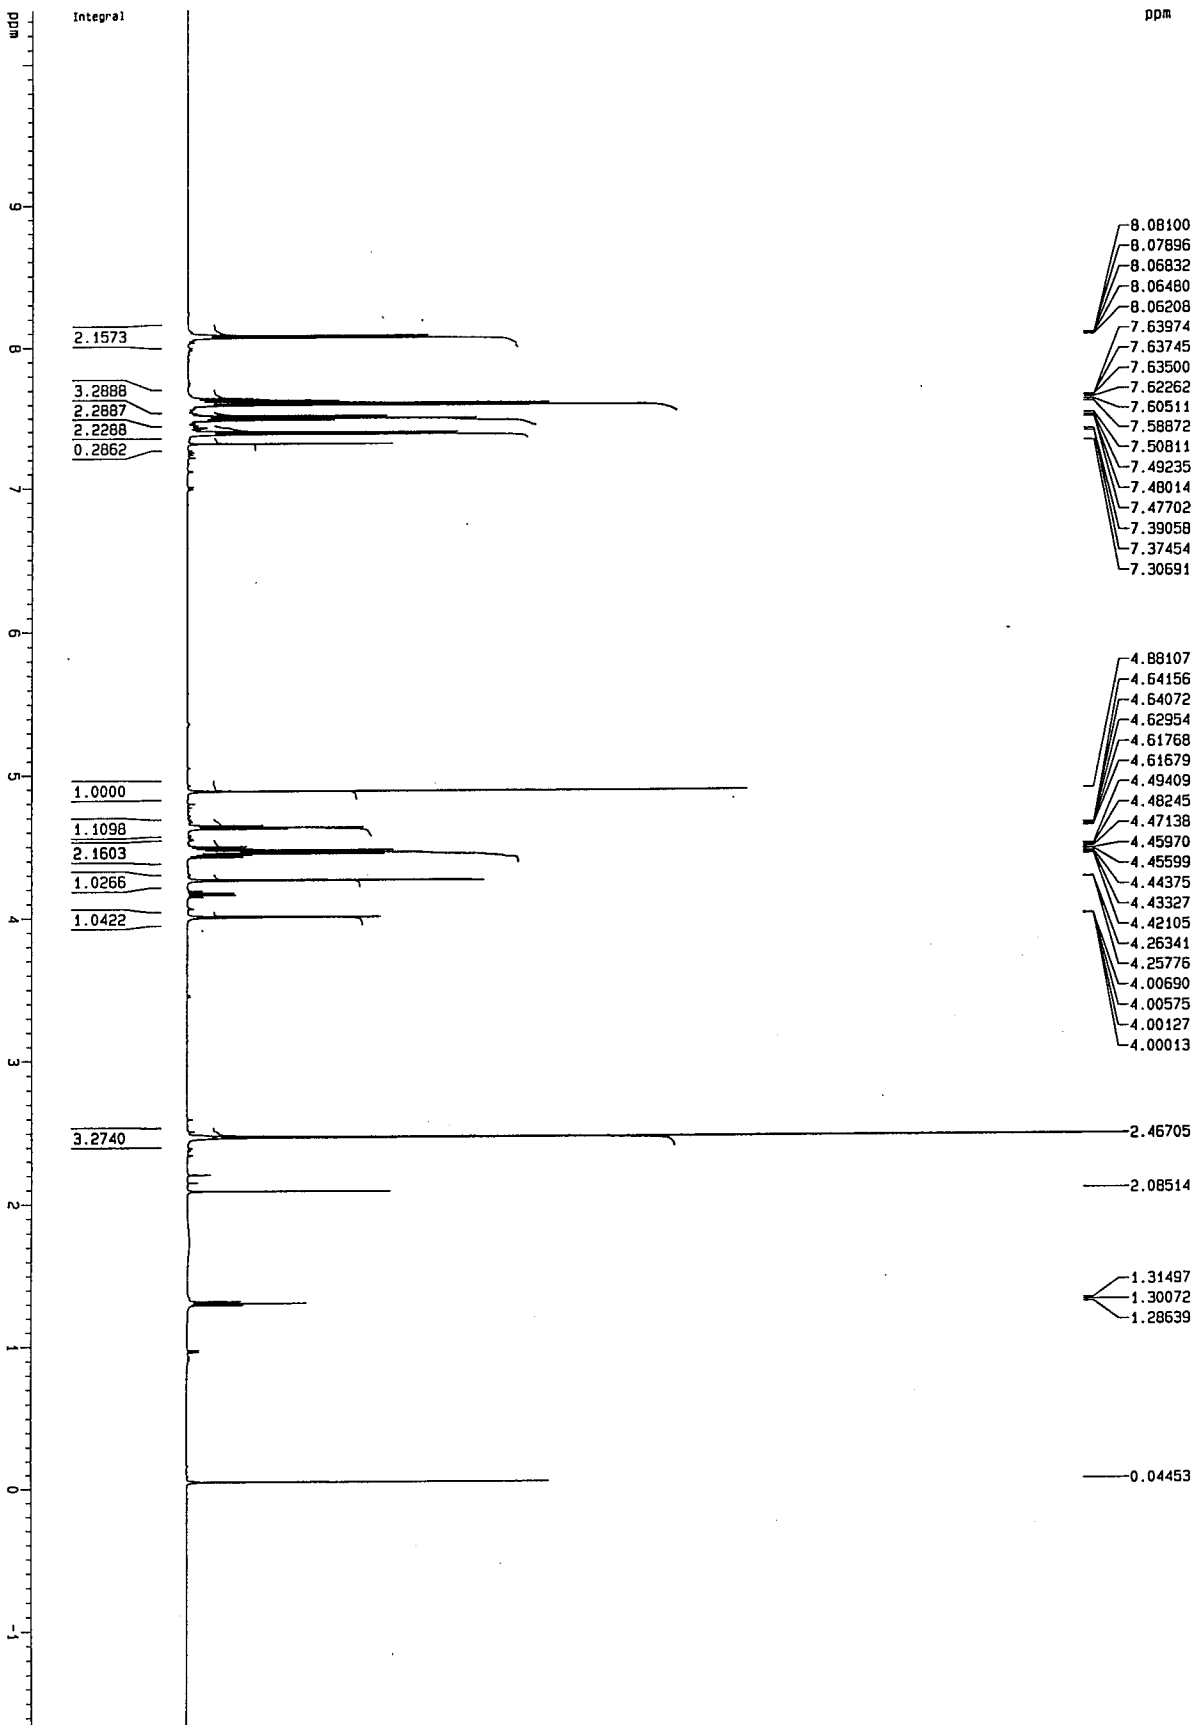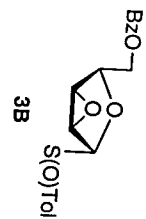

Current Data Parameters  
NAME CSC-9-7-00  
EXPNO 20  
PROCNO 1

F2 - Acquisition Parameters  
Date\_ 20000907  
Time 9:36  
INSTRUM spect  
PROBHD 5 mm BBO BB-1  
PULPROG zgpg  
TD 2930  
TO SOLVENT CDCl3  
NS 65  
DS 2  
SWH 10330.578 Hz  
FIDRES 0.157632 Hz  
AQ 3.170923 sec  
RG 181  
DM 48.400 usec  
DE 5.00 usec  
TE 300.0 K  
D1 1.00000000 sec

===== CHANNEL f1 =====  
NUC1 1H  
P1 13.70 usec  
PL1 -1.00 dB  
SFO1 500.130085 MHz

F2 - Processing parameters  
SI 32768  
SF 500.130000 MHz  
WDW EM  
SSB 0  
LB 0.30 Hz  
GB 0  
PC 1.00

10 NMR plot parameters  
CX 34.00 cm  
FIP 10.372 ppm  
F1 5187.44 Hz  
F2P -1.654 ppm  
F2 -832.14 Hz  
PPHCH 0.35400 ppm/cm  
HZCH 177.04617 Hz/cm



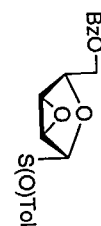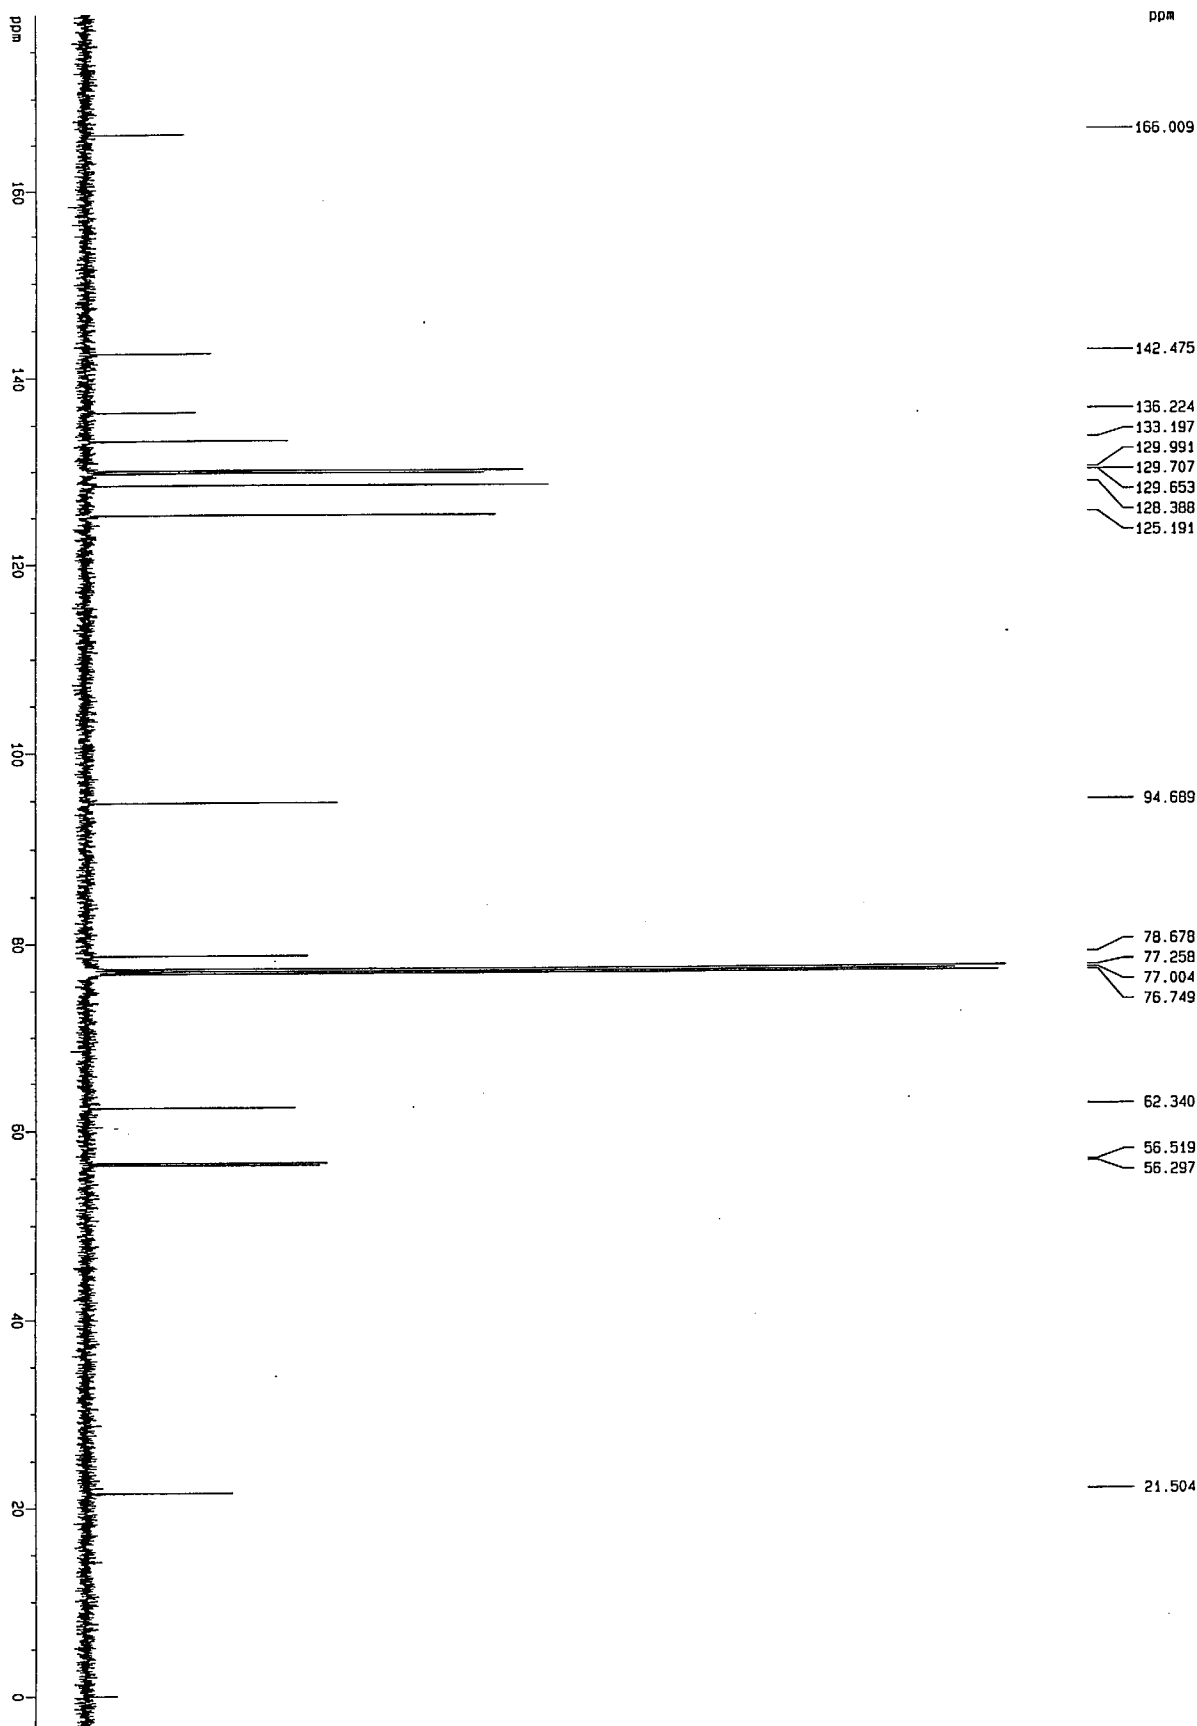

Current Data Parameters  
 NAME CSC-9-7-00  
 EXPNO 21  
 PROCNO 1

F2 - Acquisition Parameters  
 Date\_ 20000907  
 Time 9.42  
 INSTRUM spect  
 PROBR0 5 mm BBO BB-1  
 PULPROG zgpg30  
 TO 66536  
 SOLVENT CDCl3  
 NS 172  
 DS 4  
 SWH 31446.541 Hz  
 FIDRES 0.479836 Hz  
 AQ 1.0420724 sec  
 RG 8192  
 DW 15.990 usec  
 DE 6.00 usec  
 TE 300.0 K  
 D1 2.00000000 sec  
 D11 0.03000000 sec  
 D12 0.00020000 sec

===== CHANNEL f1 =====  
 NUC1 13C  
 P1 8.00 usec  
 PL1 3.00 dB  
 SF01 125.7715719 MHz

===== CHANNEL f2 =====  
 CPDPRG2 waltz16  
 NUC2 1H  
 PCPD2 100.00 usec  
 PL2 -1.00 dB  
 PL12 18.80 dB  
 PL13 18.80 dB  
 SF02 500.1320095 MHz

F2 - Processing parameters  
 SI 32768  
 SF 125.7577955 MHz  
 WDW EM  
 SSB 0  
 LB 1.00 Hz  
 GB 0  
 PC 1.40

1D NMR plot parameters  
 CX 34.00 cm  
 F1P 178.878 ppm  
 F1 22465.31 Hz  
 F2P -43.79 Hz  
 F2 -43.79 Hz  
 PRNCH 5.36491 ppm/cm  
 RZCH 874.87963 Hz/cm

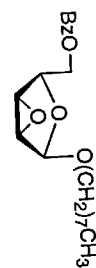

17

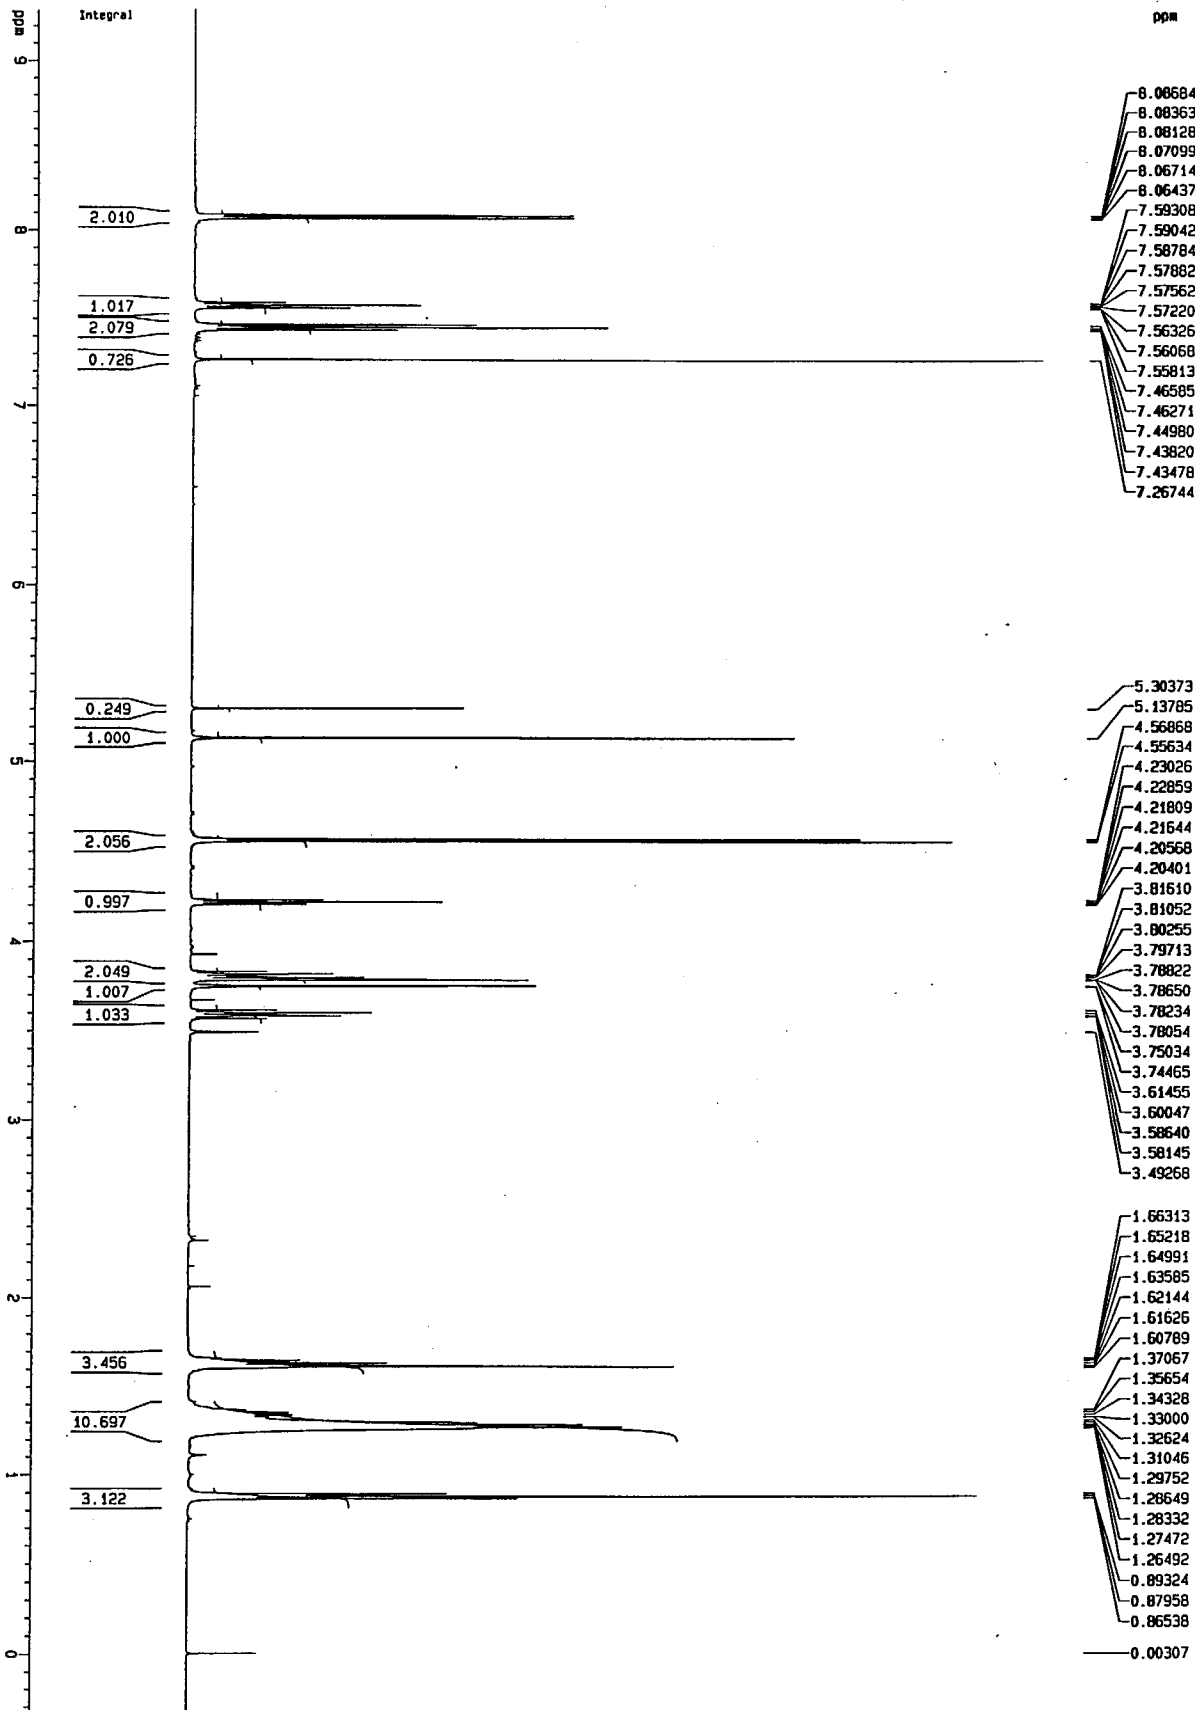

Current Data Parameters  
NAME CouplingFinal  
EXPNO 1  
PROCNO 1  
Date\_ 20000720  
Time 11.04  
INSTRUM spect  
PROBHD 5 mm BBO BB-1  
PULPROG zgpg30  
TO 65536  
SOLVENT CDCl3  
NS 25  
DS 2  
SHH 10330.578 Hz  
FIDRES 0.157632 Hz  
AQ 3.1718623 sec  
RG 181  
DM 48.400 uSAC  
DE 8.00 uSAC  
TE 300.0 K  
D1 1.00000000 sec

Channel f1  
NUC1 1H  
P1 13.70 uSAC  
PL1 -11.00 dB  
SFO1 500.136065 MHz

F2 - Processing parameters  
SI 32768  
SF 500.136065 MHz  
WDW EN  
SSB 0  
LB 0.30 Hz  
GB 0  
PC 1.00

1D NMR plot parameters  
CX 34.00 cm  
F1P 9.291 ppm  
F1 4646.91 Hz  
F2P -0.346 ppm  
F2 -173.28 Hz  
PPMCH 0.28347 ppm/cm  
HZCH 141.77007 Hz/cm

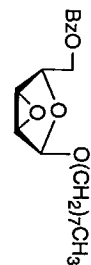

17

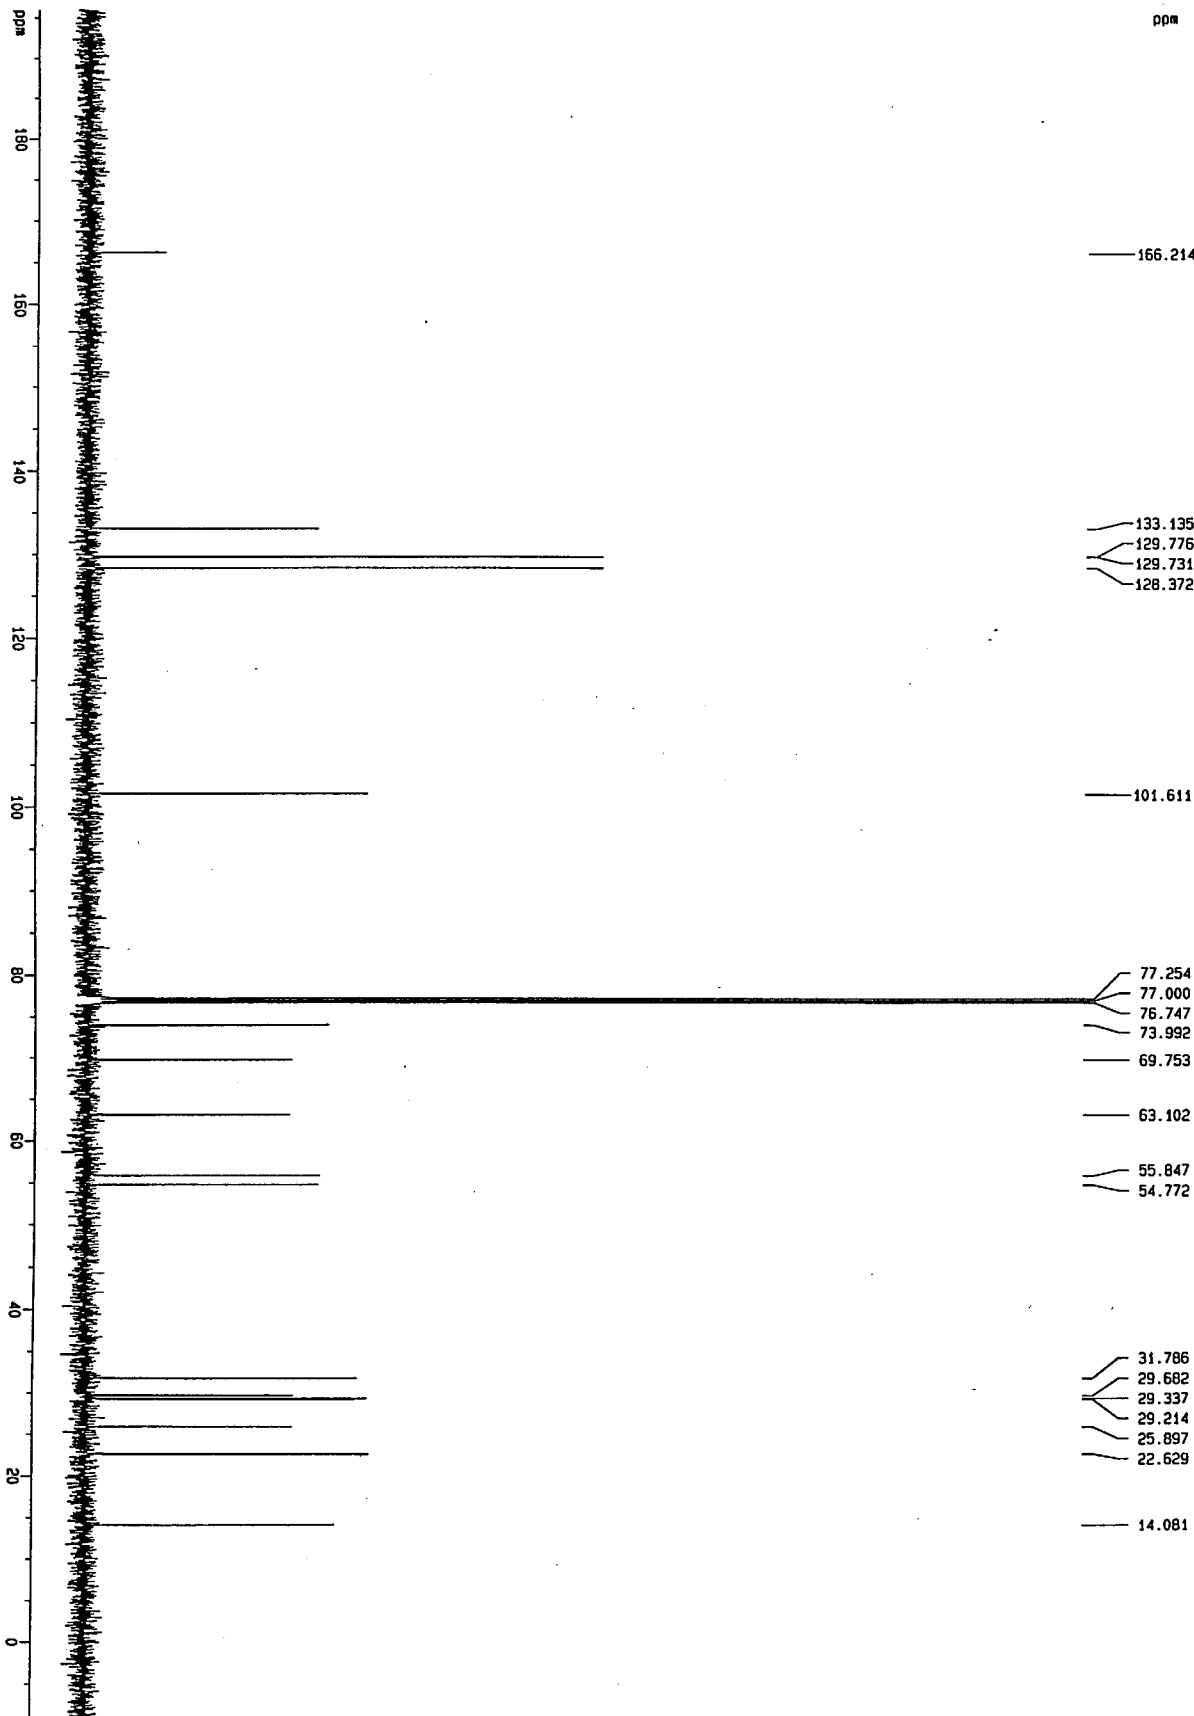

Current Data Parameters  
NAME Coupler17a  
EXPNO 2  
PROCNO 1  
F2 - Acquisition Parameters  
Date\_ 2000/20  
Time 11:08  
INSTRUM spect  
PROBHD 5 mm BBO BB-1  
PULPROG zgpg30  
TD 65536  
SOLVENT CDCl3  
NS 171  
DS 4  
SWH 31446.541 Hz  
FIDRES 0.473936 Hz  
AQ 1.0420724 sec  
RG 4096  
DM 15.500 usec  
DE 6.00 usec  
TE 300.0 K  
D1 2.00000000 sec  
D11 0.03000000 sec  
D12 0.00000000 sec

===== CHANNEL f1 =====  
NUC1 13C  
P1 8.00 usec  
PL1 3.00 dB  
SFO1 125.771919 MHz

===== CHANNEL f2 =====  
CPDPRG2 waltz16  
NUC2 1H  
PCPD2 100.00 usec  
PL2 -1.00 dB  
PL12 18.80 dB  
PL13 18.80 dB  
SFO2 500.132005 MHz

F2 - Processing parameters  
SI 32768  
SF 125.737765 MHz  
WDW EM  
SSB 0  
LB 1.00 Hz  
GB 0  
PC 1.40

1D NMR Plot Parameters  
CX 34.00 cm  
F1P 195.550 ppm  
F1 24642.19 Hz  
F2P -8.464 ppm  
F2 -1190.12 Hz  
PPMCH 6.04157 ppm/cm  
HZCH 759.77405 Hz/cm

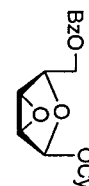

18

ppm

8.12171  
8.11828  
8.11592  
8.10558  
8.10188  
8.09917  
7.62587  
7.62335  
7.62082  
7.61189  
7.60841  
7.60518  
7.59620  
7.59365  
7.59105  
7.50052  
7.49733  
7.48435  
7.47274  
7.46947  
7.30581

5.26861  
4.60627  
4.60024  
4.59428  
4.58758  
4.56542  
4.23488  
4.23317  
4.22238  
4.22077  
4.21011  
4.20845  
3.81146  
3.80971  
3.80564  
3.80391  
3.76083  
3.75453  
3.69336  
3.68171  
3.67368  
3.66568  
3.65402  
1.95913  
1.81759  
1.80999  
1.80144  
1.79160  
1.78345  
1.77770  
1.68494  
1.44942  
1.42985  
1.31907  
1.31231  
1.30599  
1.29247  
1.28881  
1.28581  
1.26268  
1.25878  
1.25607  
1.23139  
1.18610  
0.11505  
0.04249  
0.03575

Integral

1.9732

0.9955

2.0223

1.0000

2.0509

0.9883

1.0065

1.0086

1.0032

2.0513

2.0625

1.0347

2.0959

3.2067

ppm

9

8

7

6

5

4

3

2

1

0

Current Data Parameters  
NAME Coupling2  
EXPNO 20  
PROCNO 1  
F2 - Acquisition Parameters  
Date\_ 20001019  
Time 9.37  
INSTRUM spect  
PROBHD 5 mm BBO BB-1  
PULPROG zgpg30  
TO 65536  
SOLVENT CDCl3  
NS 17  
DS 2  
SH1 10330.578 Hz  
FIDRES 0.157632 Hz  
AQ 3.171923 sec  
RG 161.3  
DW 48.400 usec  
DE 6.00 usec  
TE 300.0 K  
D1 1.00000000 sec  
----- CHANNEL f1 -----  
NUC1 1H  
P1 13.70 usec  
PL1 -1.00 dB  
SFO1 500.136085 MHz  
F2 - Processing parameters  
SI 32768  
SF 500.136085 MHz  
WDW EM  
SSB 0  
LB 0.30 Hz  
GB 0  
PC 1.00  
1D NMR plot parameters  
CX 34.00 cm  
CK 5.580 ppm  
F1 4791.41 Hz  
F2 -31.63 ppm  
F2 -31.65 Hz  
PPMCH 0.30010 ppm/cm  
HZCH 150.08989 Hz/cm

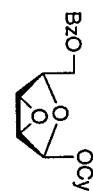

18

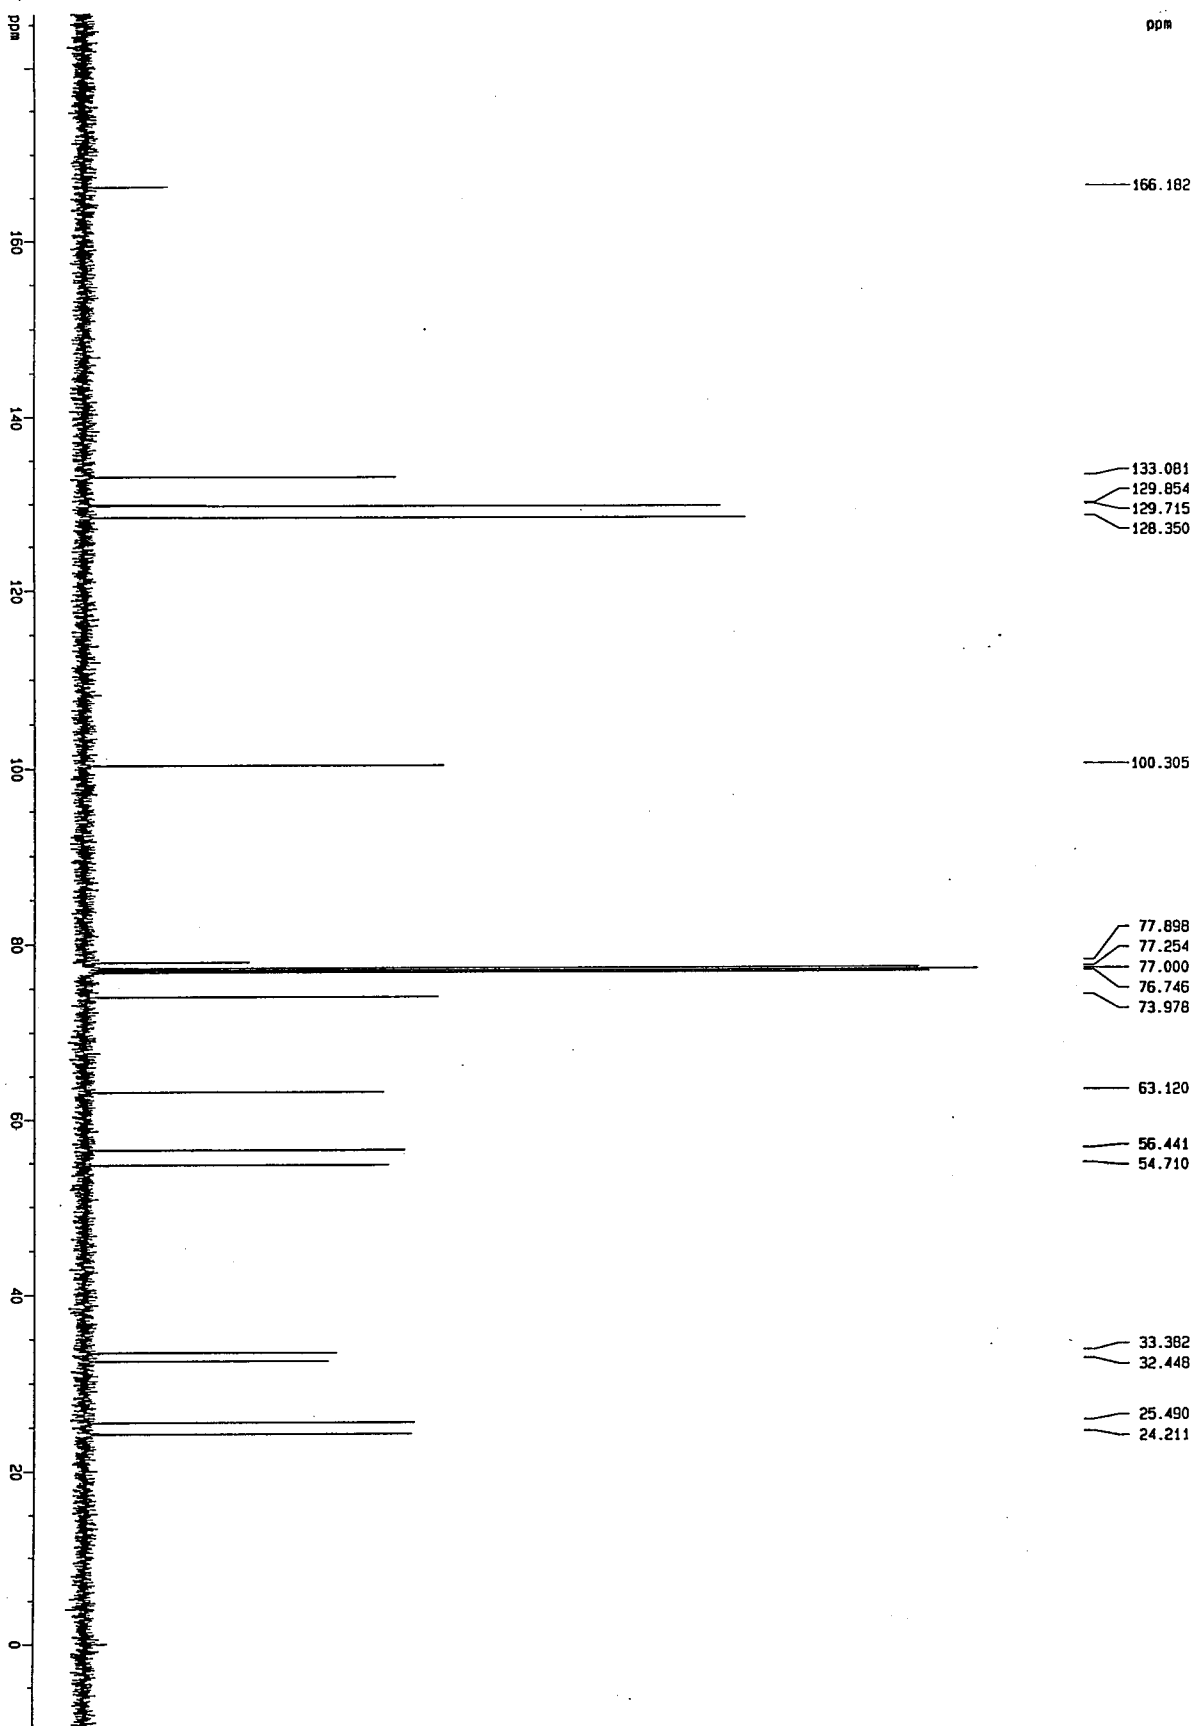

- 166.182
- 133.081
- 129.854
- 129.715
- 128.350
- 100.305
- 77.898
- 77.254
- 77.000
- 76.746
- 73.978
- 63.120
- 56.441
- 54.710
- 33.382
- 32.448
- 25.490
- 24.211

Current Data Parameters  
 NAME Coupling2  
 EXPNO 21  
 PROCNO 1  
 F2 - Acquisition Parameters  
 Date\_ 20001019  
 Time 9.40  
 INSTRUM spect  
 PROBO 5 mm BBO BB-1  
 PULPROG zgpg30  
 TD 65536  
 SOLVENT CDCl3  
 NS 93  
 DS 4  
 SWH 31446.541 Hz  
 FIDRES 0.479836 Hz  
 AQ 1.0420724 sec  
 RG 9195.2  
 DW 15.900 usec  
 DE 6.00 usec  
 TE 300.0 K  
 D1 2.00000000 sec  
 D11 0.03000000 sec  
 D12 0.00000000 sec

===== CHANNEL f1 =====  
 NUC1 13C  
 P1 8.00 usec  
 PL1 2.00 dB  
 SF01 125.775719 MHz

===== CHANNEL f2 =====  
 CPDPRG2 waltz16  
 NUC2 1H  
 PCPD2 100.00 usec  
 PL2 -1.00 dB  
 SF02 500.132005 MHz

F2 - Processing parameters  
 SI 32768  
 SF 125.775719 MHz  
 WDW EM  
 SSB 0  
 LB 1.00 Hz  
 GB 0  
 PC 1.40

1D NMR plot parameters  
 CX 34.00 ca  
 FIP 186.273 ppm  
 F1 23425.28 Hz  
 F2 -9.554 ppm  
 F2 -1201.54 Hz  
 PPMCH 5.75963 ppm/Ca  
 HZCH 724.31824 Hz/Ca

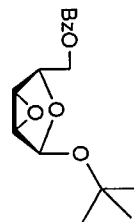

19

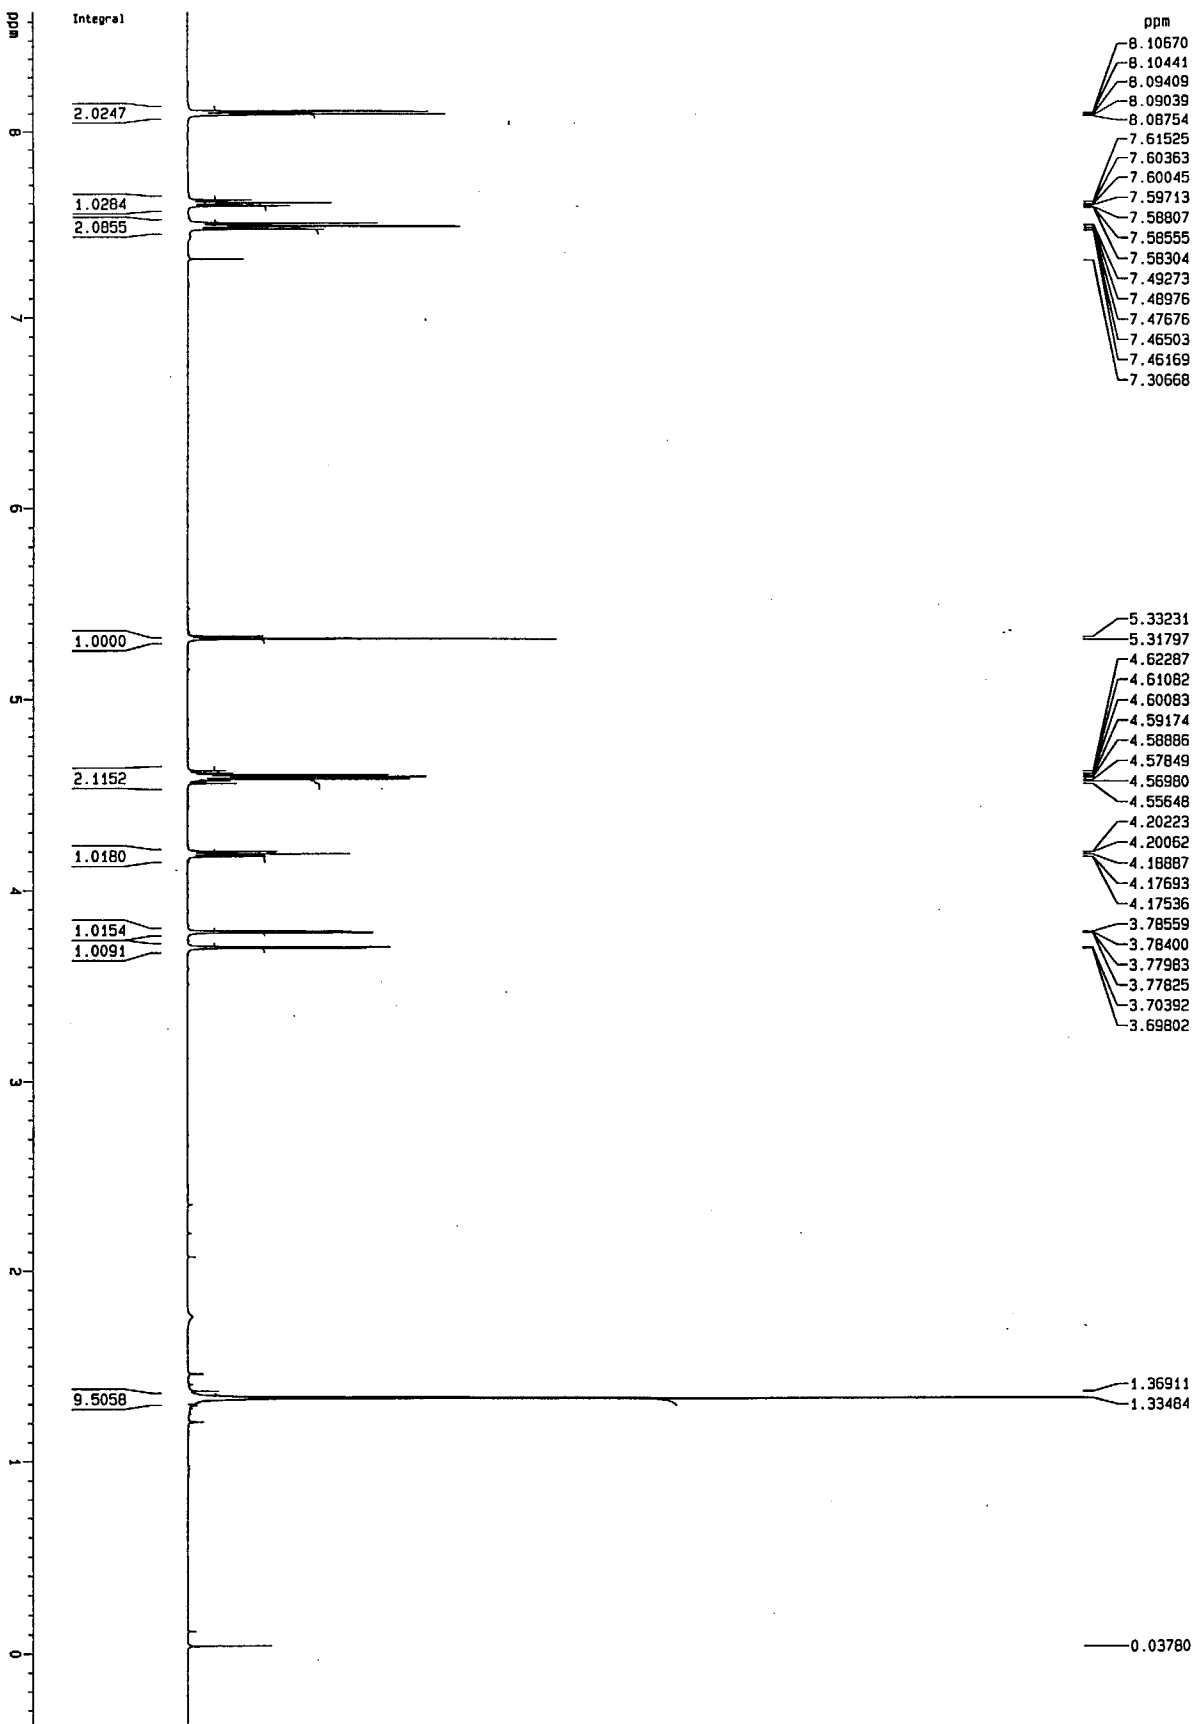

Current Data Parameters  
NAME FinalEPX  
EXPNO 30  
PROCNO 1

F2 - Acquisition Parameters  
Date\_ 20001115  
Time 10.07  
INSTRUM spect  
PROBHD 5 mm BBO BB-1  
PULPROG zg30  
TD 65536  
SOLVENT CDCl3  
NS 25  
DS 2  
SWH 10330.578 Hz  
FIDRES 0.157632 Hz  
AQ 3.1719923 sec  
RG 90.5  
DM 48.400 uSec  
DE 8.00 uSec  
TE 300.0 K  
D1 1.00000000 sec

===== CHANNEL f1 =====  
NUC1 1H  
P1 13.70 uSec  
PL1 -1.00 dB  
SFO1 500.130065 MHz

F2 - Processing parameters  
SI 32768  
SF 500.130060 MHz  
WDW EM  
SSB 0  
LB 0.30 Hz  
GB 0  
PC 1.00

1D NMR plot parameters  
CX 34.00 cm  
F1P 8.653 ppm  
F1 4327.50 Hz  
F2P -0.374 ppm  
F2 -187.18 Hz  
PPMCH 0.26550 ppm/cm  
HZCH 132.76464 Hz/cm

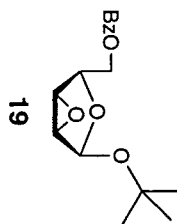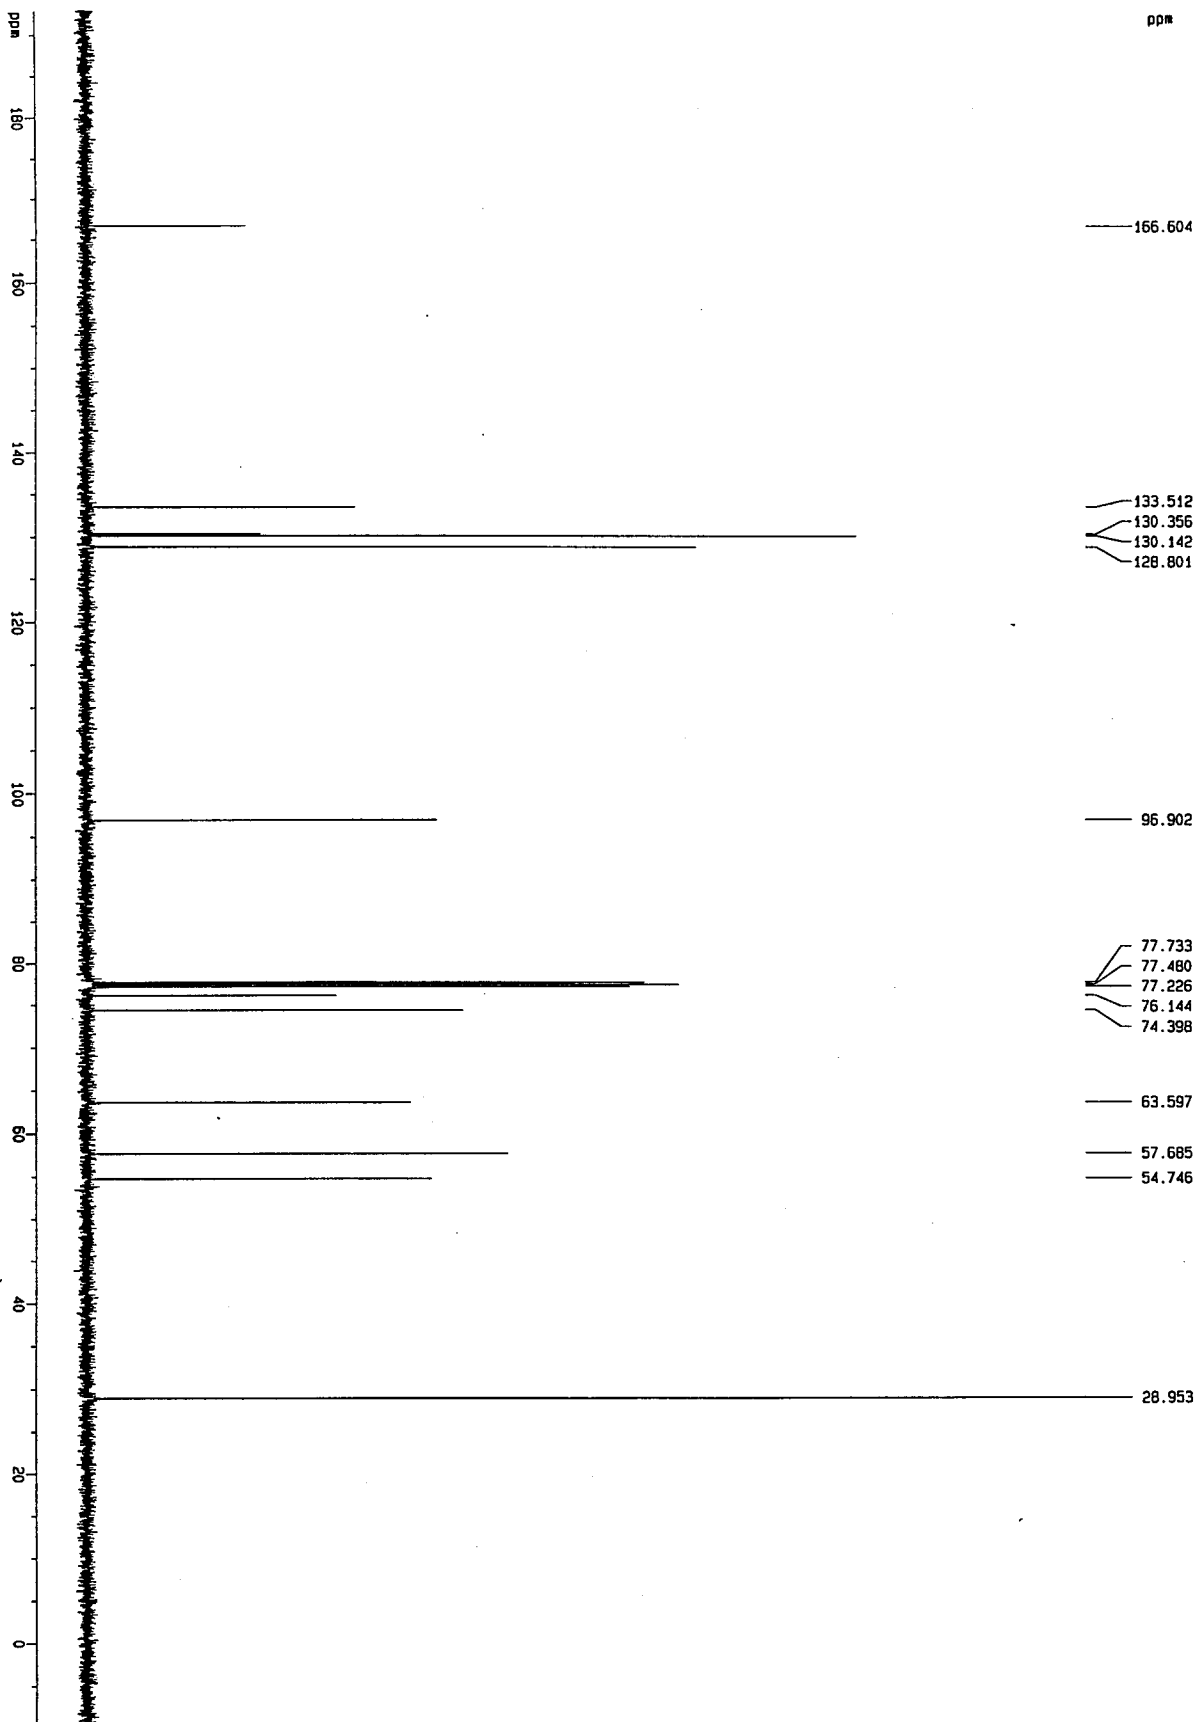

Current Data Parameters  
NAME Final190A  
EXPNO 31  
PROCNO 1  
F2 - Acquisition Parameters  
Date\_ 20001119  
Time 10.15  
INSTRUM spect  
PROBHD 5 mm BBO BB-1  
PULPROG zgpg30  
TD 26950  
ID BBS56  
SOLVENT CDCl3  
NS 76  
DS 4  
SWH 31446.541 Hz  
FIDRES 0.473636 Hz  
AQ 1.0460724 sec  
RG 8192  
DM 15.900 usec  
DE 6.00 usec  
TE 300.0 K  
D1 2.00000000 sec  
D11 0.03000000 sec  
D12 0.00002000 sec

===== CHANNEL f1 =====  
NUC1 13C  
P1 8.00 usec  
PL1 3.00 dB  
SF01 125.775719 MHz

===== CHANNEL f2 =====  
CPDPRG2 waltz16  
NUC2 1H  
PCPD2 100.00 usec  
PL2 -1.00 dB  
PL12 18.80 dB  
PL13 18.80 dB  
SF02 500.132005 MHz

F2 - Processing parameters  
SI 32768  
SF 125.757739 MHz  
WDW EM  
SSB 0  
LB 1.00 Hz  
GB 0  
PC 1.40

1D NMR Plot parameters  
CA 34.00 cm  
FIP 192.846 ppm  
F1 24421.80 Hz  
F2P -9.584 ppm  
F2 -1201.54 Hz  
PRNCH 5.56256 ppm/cm  
HZCM 748.83068 Hz/cm

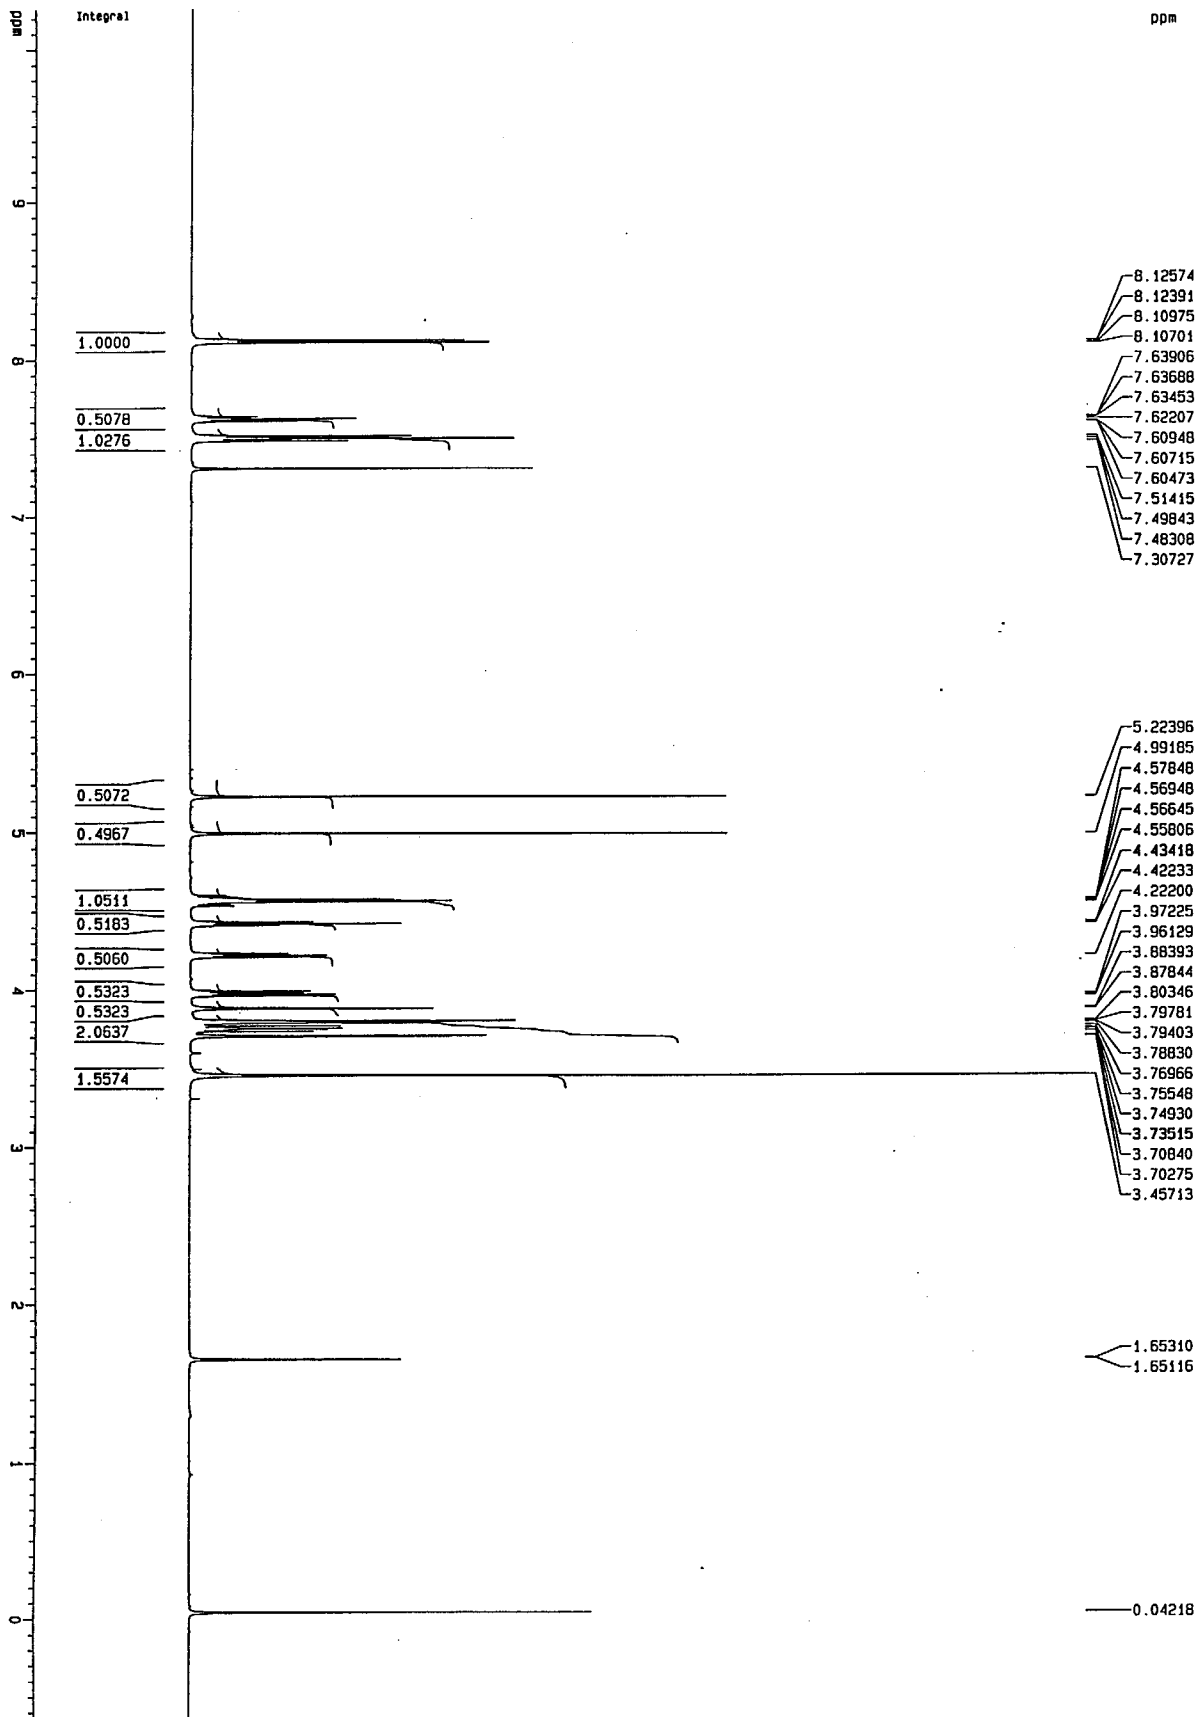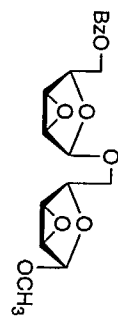

Current Data Parameters  
NAME C13DAPLE  
EXPNO 20  
PROCNO 1  
F2 - Acquisition Parameters  
Date\_ 20000717  
Time 11:28  
INSTRUM spect  
PROBHD 5 mm BBO BB-1  
PULPROG zg30  
TD 65536  
SOLVENT CDCl<sub>3</sub>  
NS 29  
DS 2  
SWH 10330.578 Hz  
FIDRES 0.157532 Hz  
AQ 3.1719923 sec  
RG 203.2  
RW 48.400 usec  
DE 6.00 usec  
TE 300.0 K  
D1 1.00000000 sec

===== CHANNEL f1 =====  
NUC1 <sup>13</sup>C  
P1 13.70 usec  
PL1 -1.00 dB  
SFO1 500.130085 MHz

F2 - Processing parameters  
SI 32768  
SF 500.130000 MHz  
WDW EM  
SSB 0  
LB 0.30 Hz  
GB 0  
PC 1.00

10 MHz plot parameters  
CX 24.00 cm  
F1P 10.429 ppm  
F1 5130.86 Hz  
F2P -0.146 ppm  
F2 -322.86 Hz  
PPMCH 0.35073 ppm/cm  
HCHM 180.40851 Hz/cm



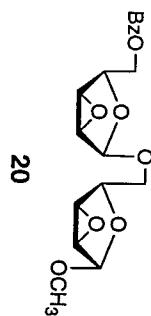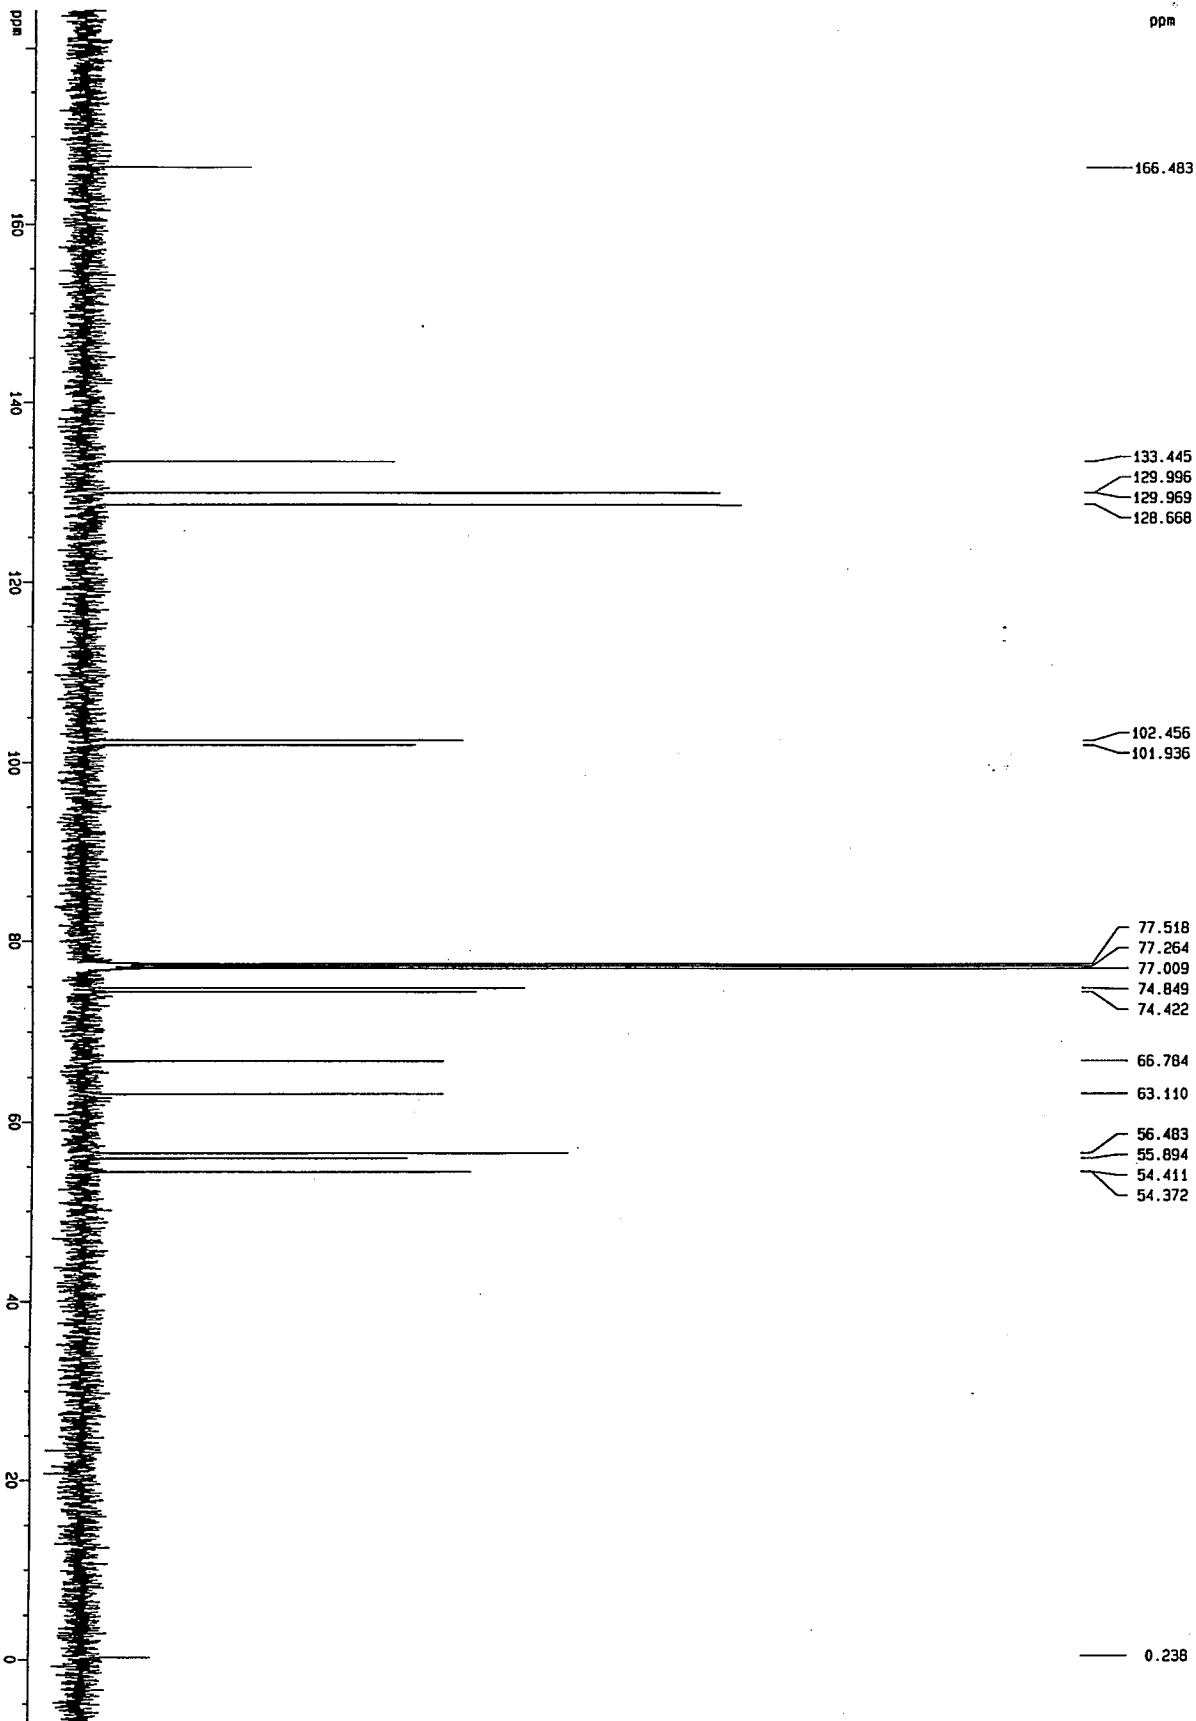

Current Data Parameters  
NAME C13DUALF  
EXPNO 21  
PROCNO 1  
F2 - Acquisition Parameters  
Date\_ 20000717  
Time 11:25  
INSTRUM spect  
PROBHD 5 mm BBO BB-1  
PULPROG zgpg30  
TD 65536  
SOLVENT DMS  
NS 181  
DS 4  
SWH 31446.541 Hz  
FIDRES 0.478626 Hz  
AQ 1.0426724 sec  
RG 13004  
DM 15.500 usec  
DE 6.00 usec  
TE 300.0 K  
D1 2.00000000 sec  
D11 0.03000000 sec  
D12 0.00002000 sec

===== CHANNEL f1 =====  
NUC1 13C  
P1 8.40 usec  
PL1 3.00 dB  
SF01 125.771519 MHz

===== CHANNEL f2 =====  
CPDPRG2 waltz16  
NUC2 1H  
PCPD2 100.00 usec  
PL2 -1.00 dB  
PL12 18.80 dB  
PL13 18.80 dB  
SF02 500.136005 MHz

F2 - Processing parameters  
SI 32768  
SF 125.777638 MHz  
WDW EM  
SSB 0  
LB 1.00 Hz  
GB 0  
PC 1.40

1D NMR plot parameters  
CX 34.00 cm  
FID 184.367 ppm  
F1 23185.84 Hz  
F2 -7.100 ppm  
F2 -682.82 Hz  
PRNCH 5.63138 ppm/cm  
HZCH 708.19006 Hz/cm

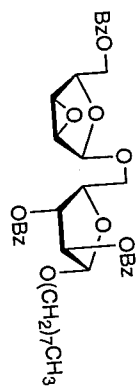

21

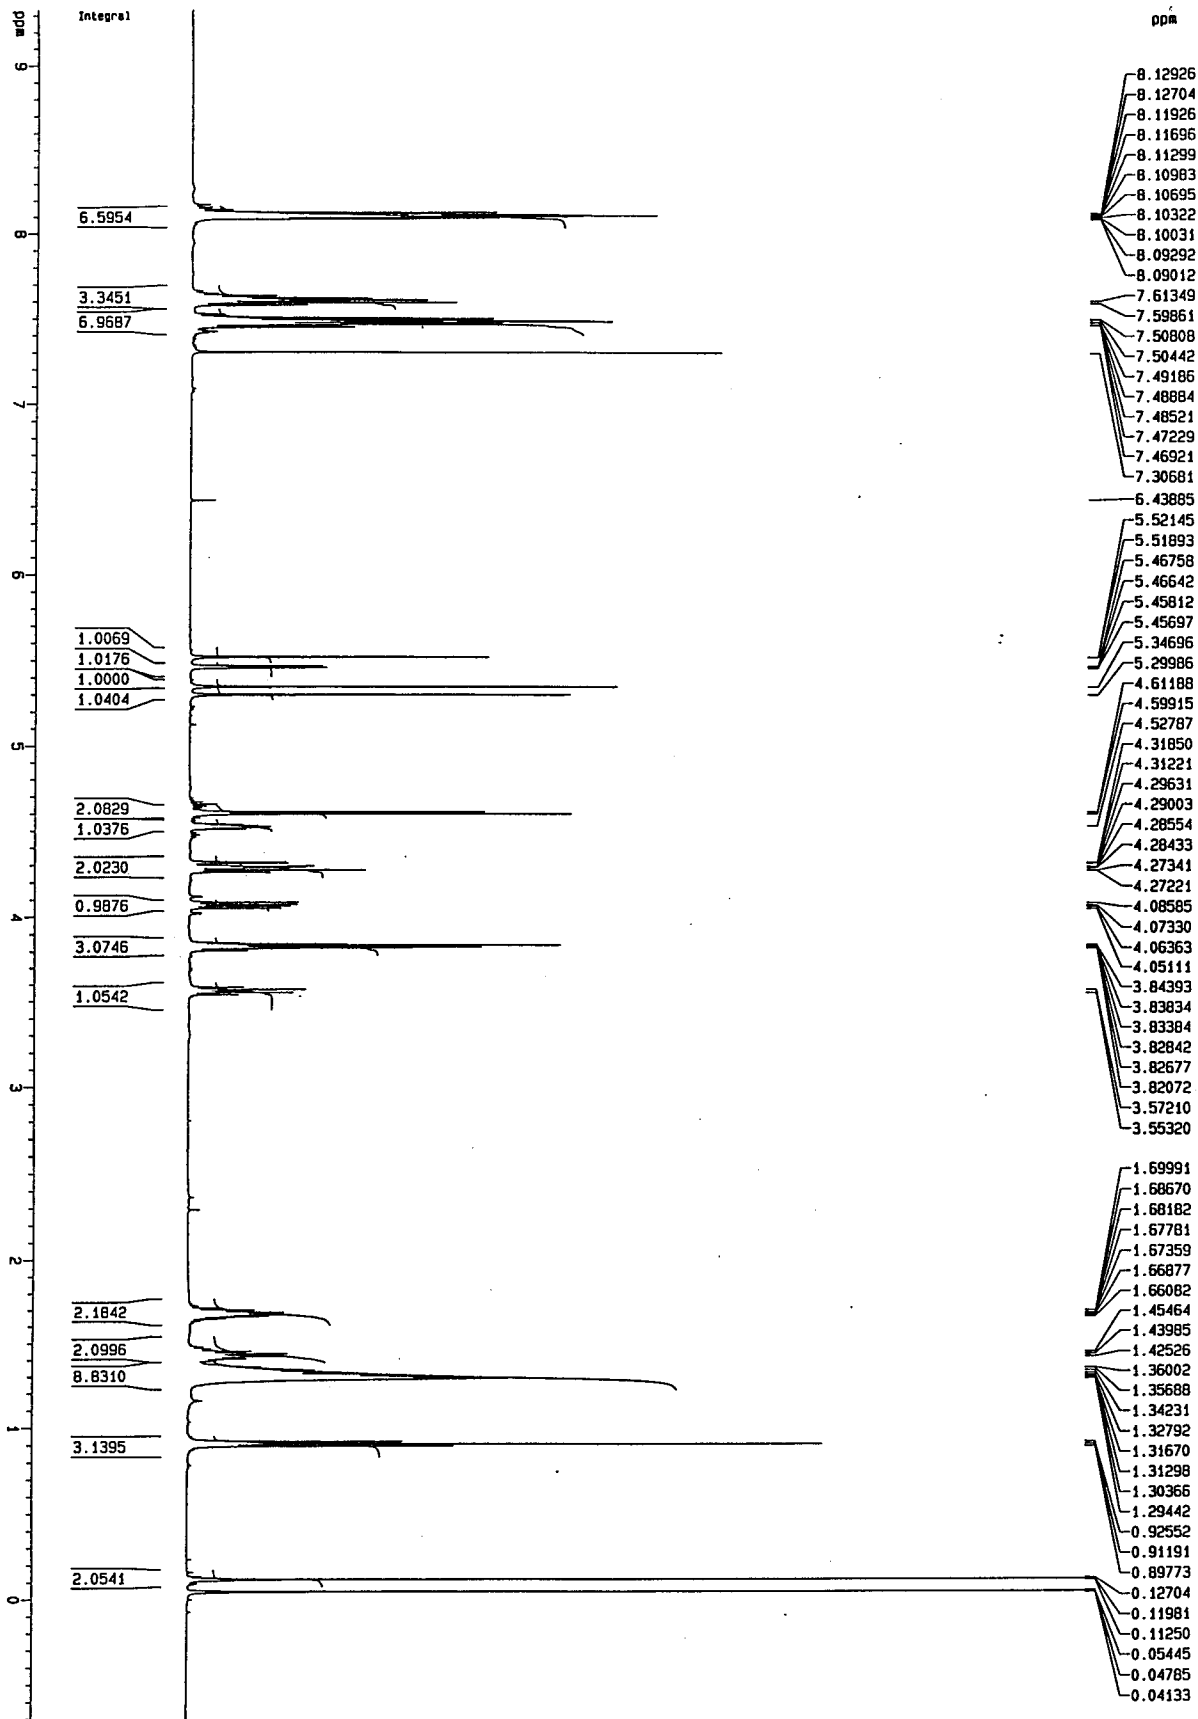

Current Data Parameters  
NAME: 21  
EXPNO: 190  
PROCNO: 1  
F2 - Acquisition Parameters  
Date\_: 20001104  
Time: 15.44  
INSTRUM: spect  
PROBHD: 5 mm BBO BB-1  
PULPROG: zgpg30  
TD: 65536  
SOLVENT: CDCl3  
NS: 54  
DS: 2  
SWH: 30330.578 Hz  
FIDRES: 0.157632 Hz  
AQ: 3.1719923 sec  
RG: 256  
DM: 48.400 usec  
DE: 6.00 usec  
TE: 300.0 K  
D1: 3.00000000 sec

===== CHANNEL f1 =====  
NUC1: 1H  
P1: 13.70 usec  
PL1: -1.00 dB  
SF01: 500.1350805 MHz

F2 - Processing parameters  
SI: 32768  
SF: 500.1350000 MHz  
WDW: EM  
SSB: 0  
LB: 0.30 Hz  
GB: 0  
PC: 1.00

1D NMR Plot parameters  
CX: 34.00 cm  
F1P: 9.331 ppm  
F1: 4666.85 Hz  
F2P: -0.714 ppm  
F2: -356.91 Hz  
P1NCH: 0.25544 ppm/cm  
HZCM: 347.76033 Hz/cm

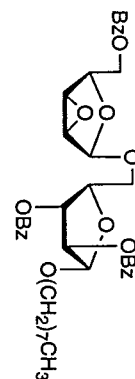

21

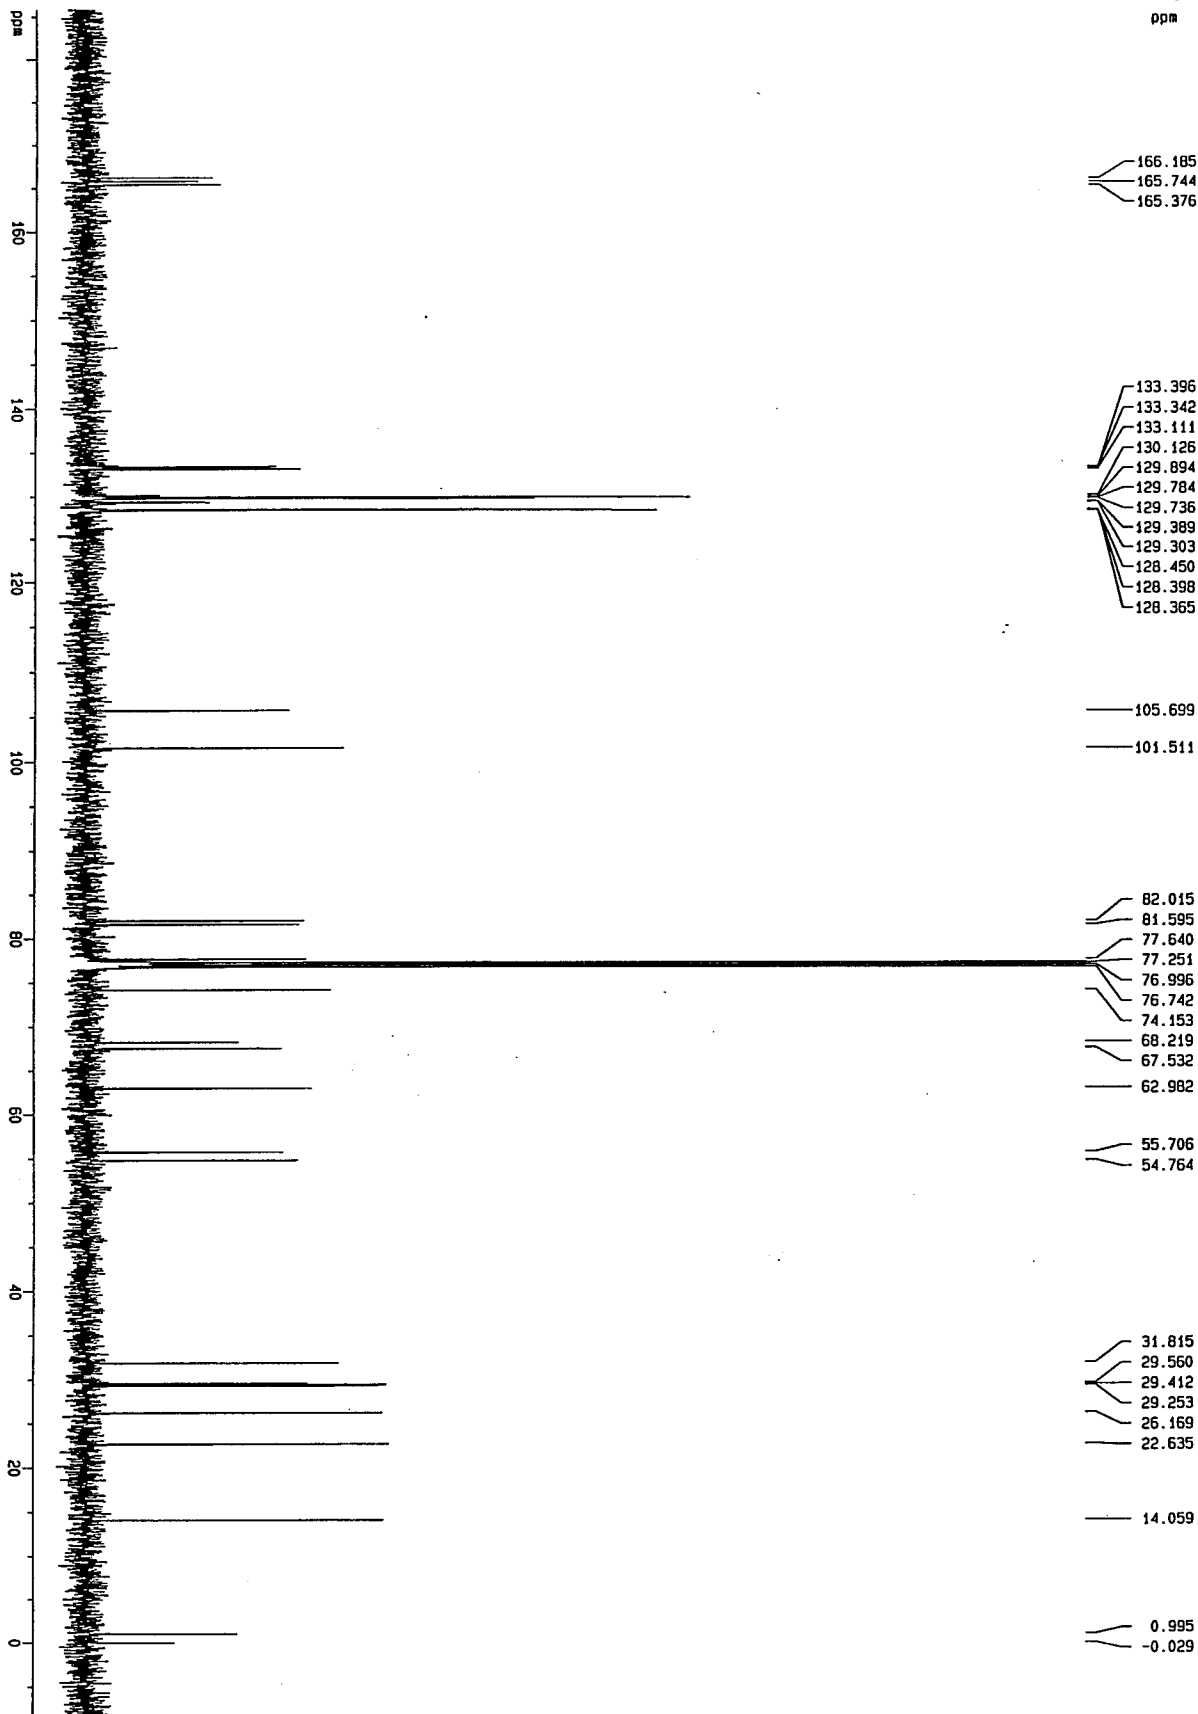

Current Data Parameters  
NAME CoupledFinal  
EXPNO 191  
PROCNO 1

F2 - Acquisition Parameters  
Date\_ 20001104  
Time 18.47  
INSTRUM spect  
PROBHD 5 mm BBO BB-1  
PULPROG zgpg30  
TD 65536  
SOLVENT DMS  
NS 469  
DS 4  
SWH 3146.541 Hz  
FIDRES 0.479836 Hz  
AQ 1.0480724 sec  
RG 1024.3  
WE 15.900 usec  
DE 5.00 usec  
TE 300.0 K  
D1 2.0000000 sec  
D11 0.0300000 sec  
D12 0.0002000 sec

===== CHANNEL f1 =====  
NUC1 13C  
P1 7.50 usec  
PL1 3.00 dB  
SF01 125.7715719 MHz

===== CHANNEL f2 =====  
CPDPRG2 waltz16  
NUC2 1H  
PCPD2 100.00 usec  
PL2 -1.00 dB  
PL12 18.80 dB  
PL13 18.80 dB  
SF02 500.1320005 MHz

F2 - Processing parameters  
SI 32768  
SF 125.7577946 MHz  
WDW EM  
SSB 0  
LB 1.00 Hz  
GB 0  
PC 1.40

10 NMR plot parameters  
CX 34.00 cm  
FIP 185.831 ppm  
F1 23369.71 Hz  
F2P -8.627 ppm  
F2 -1084.89 Hz  
PRMCK 5.71935 ppm/cm  
HZCM 719.26275 Hz/cm

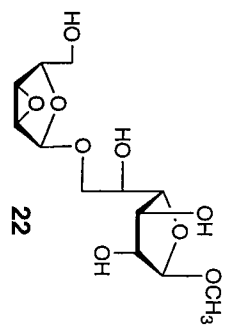

22

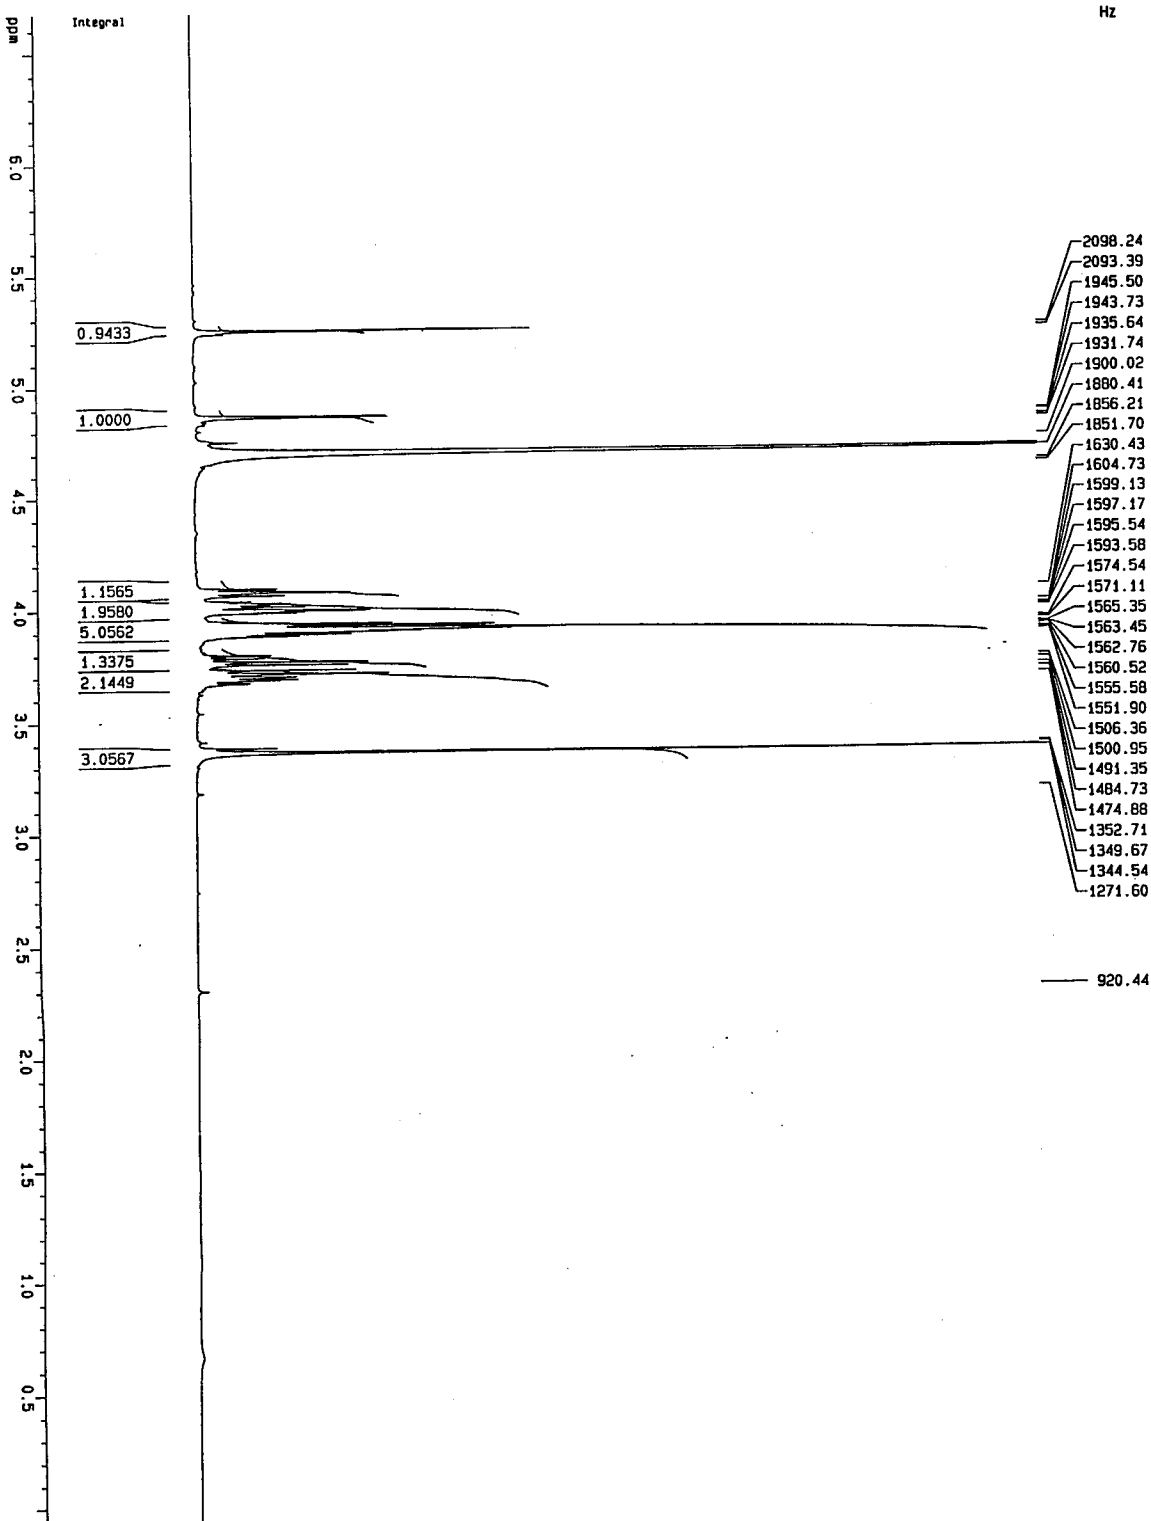

Current Data Parameters  
 NAME May20-2000-79ad  
 EXPNO 20  
 PROCNO 1

F2 - Acquisition Parameters  
 Date\_ 20000520  
 Time 14.56  
 INSTRUM spect  
 PROBHD 5 mm BBO BB-1  
 PULPROG zg30  
 TD 32768  
 SOLVENT D2O  
 NS 16  
 DS 2  
 SMH 8278.146 Hz  
 FIDRES 0.252629 Hz  
 AQ 1.9792372 sec  
 RG 90.5  
 DM 60.400 usec  
 DE 6.00 usec  
 TE 300.0 K  
 D1 1.00000000 sec

CHANNEL f1  
 M/C1 1H  
 P1 7.50 usec  
 PL1 -6.00 dB  
 SF01 400.1324710 MHz

F2 - Processing parameters  
 SI 32768  
 SF 400.1300000 MHz  
 WDW EM  
 SSB 0  
 LB 0.30 Hz  
 GB 0  
 PC 1.00

3D NMR Plot parameters  
 CX 30.00 cm  
 FXP 6.674 ppm  
 F1 2670.35 Hz  
 F2P -0.067 ppm  
 F2 -26.81 Hz  
 FPMCH 0.22469 ppm/cm  
 HZCH 89.90549 Hz/cm

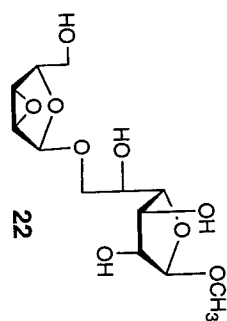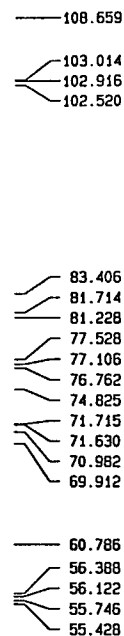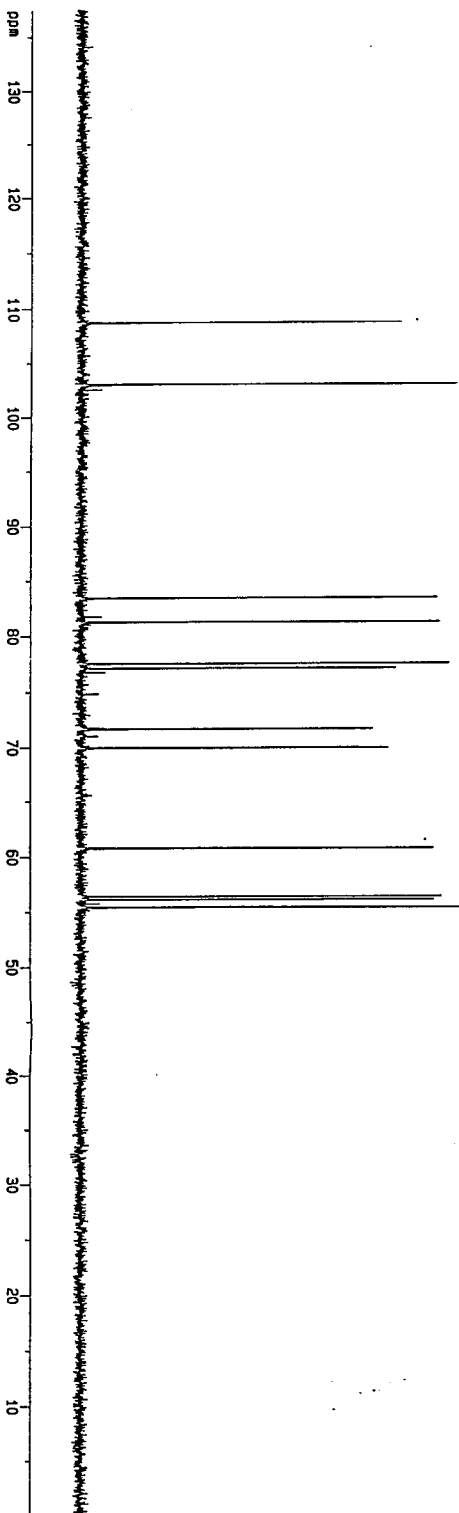

Current Data Parameters  
NAME May20-2000-79ad  
EXPNO 21  
PROCNO 1

F2 - Acquisition Parameters  
Date\_ 20000520  
Time 15.01  
INSTRUM spect  
PROBHD 5 mm BBO BB-1  
PULPROG zgpg30  
TD 65536  
SOLVENT D2O  
NS 974  
DS 4  
SMH 25125.629 Hz  
FIDRES 0.383387 Hz  
AQ 1.3042164 sec  
RG 4096  
DM 19.900 usec  
DE 5.00 usec  
TE 300.0 K  
D1 2.00000000 sec  
d11 0.03000000 sec  
d12 0.0002000 sec

----- CHANNEL f1 -----  
NUC1 13C  
P1 5.90 usec  
PL1 -6.00 dB  
SFO1 100.6237959 MHz

----- CHANNEL f2 -----  
CPDPRG2 waltz16  
NUC2 1H  
PCPD2 80.00 usec  
PL2 -6.00 dB  
PL12 15.00 dB  
PL13 15.00 dB  
SFO2 400.1316005 MHz

F2 - Processing Parameters  
SI 32768  
SF 100.6127176 MHz  
WDW EM  
SSB 0  
LB 1.00 Hz  
GB 0  
PC 1.00

1D NMR plot parameters  
CX 30.00 cm  
F1P 137.506 ppm  
F1 13834.86 Hz  
F2P 0.054 ppm  
F2 5.39 Hz  
PPHCH 4.58175 ppm/cm  
H2CH 460.98224 Hz/cm

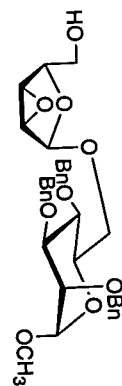

23

Current Data Parameters  
NAME (Qualifinal)  
EXPNO 60  
PROCNO 1  
F2 - Acquisition Parameters  
Date\_ 20060722  
Time 9:54  
INSTRUM spect  
PROBHD 5 mm BBO BB-1  
PULPROG zgpg30  
TD 65536  
TO SOLVENT CDCl3  
NS 2  
DS 2  
SWH 10230.578 Hz  
FIDRES 0.157622 Hz  
AQ 3.1718923 sec  
RG 40.3  
GB 48.400 usec  
DE 8.00 usec  
TE 300.0 K  
D1 1.00000000 sec

===== CHANNEL f1 =====  
NUC1 31P  
P1 13.70 usec  
PL1 -1.00 dB  
SFO1 500.130085 MHz

F2 - Processing parameters  
SI 32768  
SF 500.1300200 MHz  
WDW EM  
SSB 0  
LB 0.30 Hz  
GB 0  
PC 1.00

10 MHz plot parameters  
CX 34.00 cm  
FIP 9.133 ppm  
F1 4567.70 Hz  
F2 -1.025 ppm  
F2 -512.73 Hz  
PPMCH 0.23877 ppm/cm  
KIDCH 149.42430 Hz/cm

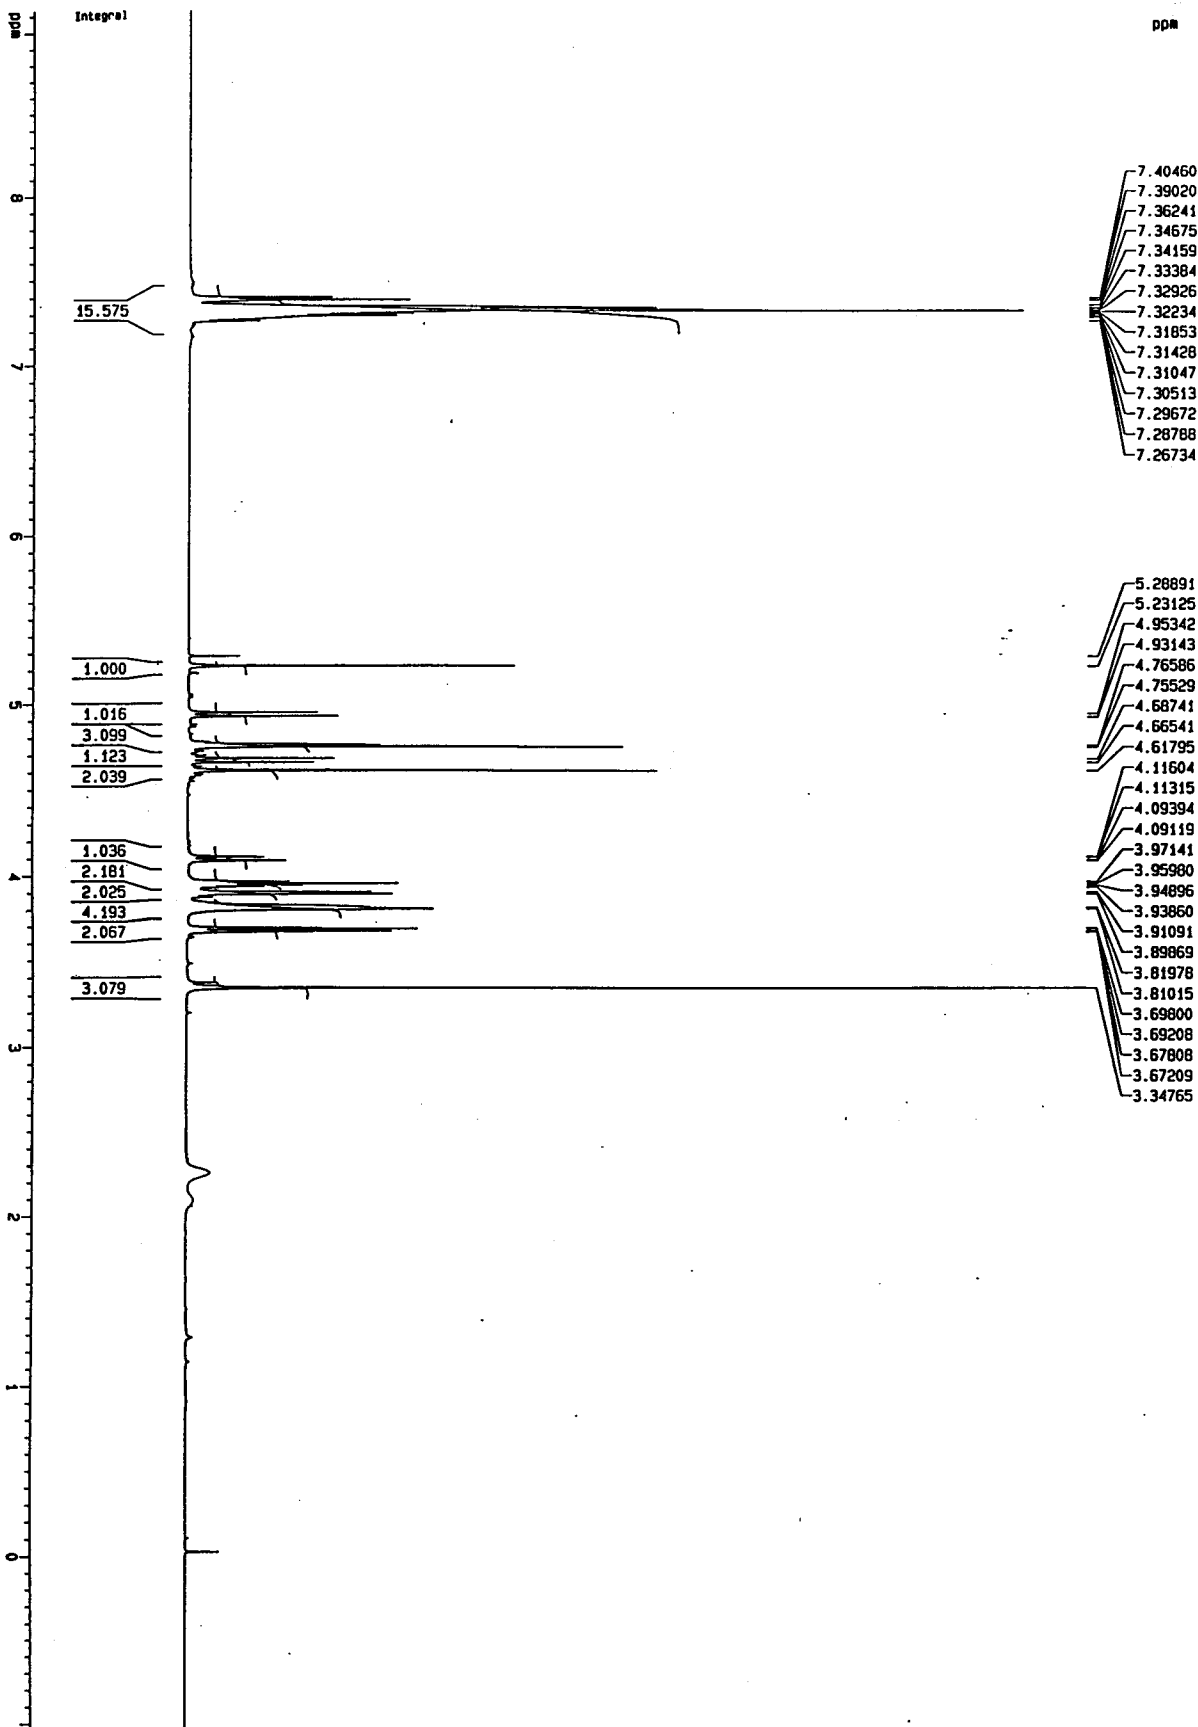

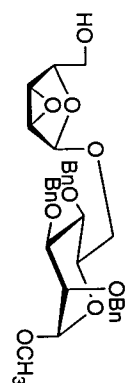

23

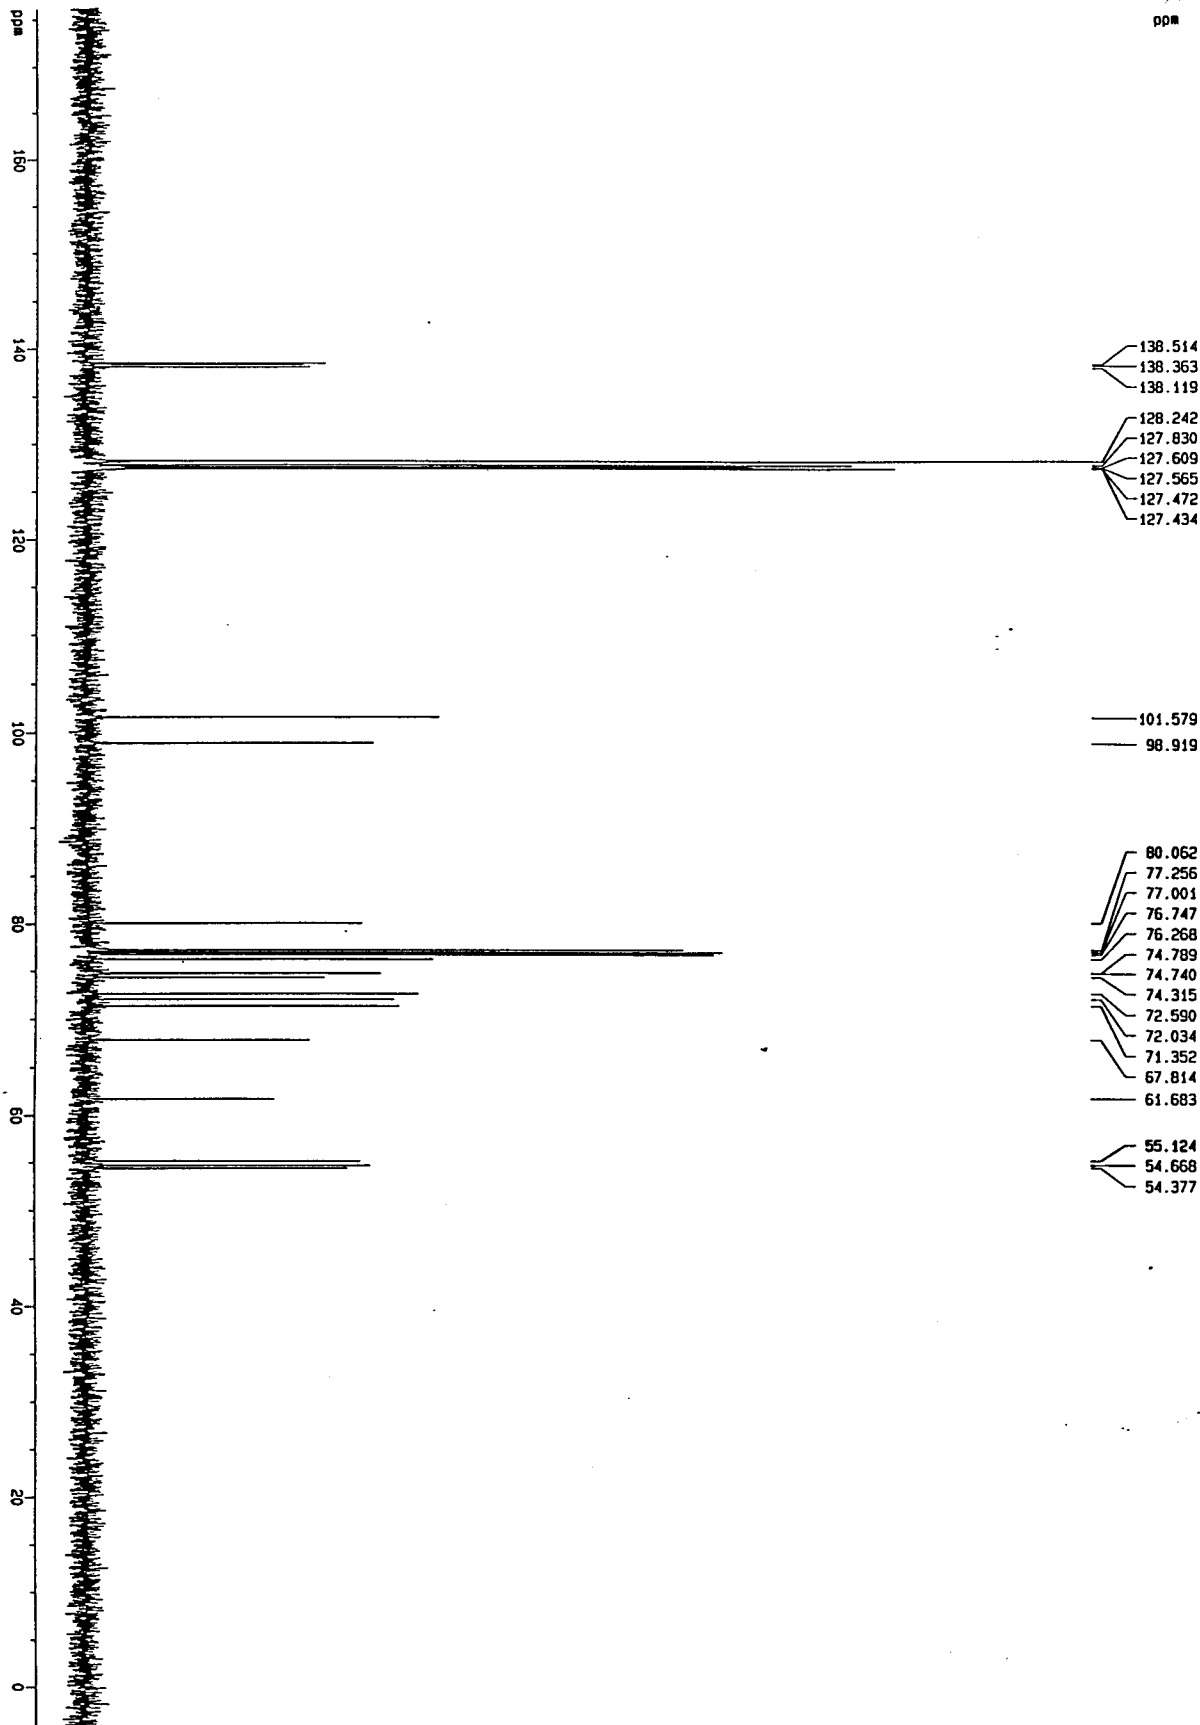

Current Data Parameters  
NAME Compound  
EXPNO 1  
PROCNO 1  
PROCPS 1  
F2 - Acquisition Parameters  
Date\_ 20000722  
Time 9.07  
INSTRUM spect  
PROBHD 5 mm BBO BB-1  
PULPROG zgpg30  
TD 65536  
SOLVENT CDCl3  
NS 23  
DS 4  
SWH 31446.541 Hz  
FIDRES 0.473836 Hz  
AQ 1.0420724 sec  
RG 6502  
DM 15.500 usec  
DE 6.00 usec  
TE 300.0 K  
D1 2.00000000 sec  
D11 0.03000000 sec  
D12 0.00000000 sec

===== CHANNEL f1 =====  
NUC1 13C  
P1 8.00 usec  
PL 3.00 dB  
SFO1 125.7713719 MHz

===== CHANNEL f2 =====  
COPROC2 walz16  
NUC2 1H  
PCPR2 100.00 usec  
PL2 -1.00 dB  
PL12 18.00 dB  
PL13 18.00 dB  
SFO2 500.132005 MHz

F2 - Processing parameters  
SI 32768  
SF 125.7578109 MHz  
WDW EM  
SSB 0  
LB 1.00 Hz  
GB 0  
PC 1.40

10 peak list parameters  
CX 34.00 cm  
F1P 178.115 ppm  
F1 22147.89 Hz  
F2P -4.374 ppm  
F2 -550.10 Hz  
PPHCH 5.30652 ppm/cm  
H2CH 667.58813 Hz/cm

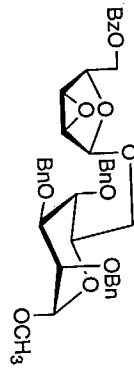

24

ppm

- 8.10852
- 8.10624
- 8.09203
- 8.08933
- 7.60758
- 7.49033
- 7.47421
- 7.42321
- 7.41986
- 7.40901
- 7.40547
- 7.39507
- 7.37908
- 7.36404
- 7.35362
- 7.34633
- 7.34406
- 7.33958
- 7.33001
- 7.32647
- 7.30667

- 5.17223
- 5.00444
- 4.98199
- 4.89430
- 4.87522
- 4.87013
- 4.78821
- 4.74944
- 4.74297
- 4.72457
- 4.70440
- 4.68192
- 4.57940
- 4.56696
- 4.56194
- 4.55000
- 4.25003
- 4.24853
- 4.00178
- 3.98469
- 3.88884
- 3.80943
- 3.80783
- 3.80324
- 3.80175
- 3.75135
- 3.74535
- 3.44081

- 0.96922
- 0.15138
- 0.12990
- 0.05631

ppm

Integral

2.322

1.301

18.589

1.000

1.039

2.095

4.299

2.236

1.098

1.150

3.098

1.133

2.205

1.014

3.142

Current Data Parameters  
NAME: CouplingFinal  
EXPNO: 200  
PROCNO: 1  
Date\_: 20001004  
Time: 18.01  
INSTRUM: spect  
PROBHD: 5 mm BBO BB-1  
PULPROG: zg30  
TD: 65536  
SOLVENT: CDCl3  
NS: 29  
DS: 2  
SWH: 10330.578 Hz  
FIDRES: 0.157632 Hz  
AQ: 3.1719923 sec  
RG: 128  
DW: 48.400 usec  
DE: 5.00 usec  
TE: 300.0 K  
D1: 1.00000000 sec

===== CHANNEL f1 =====  
NUC1: 1H  
P1: 13.70 usec  
PL1: -1.00 dB  
SF01: 500.1300885 MHz

F2 - Processing parameters  
SI: 32768  
SF: 500.1300000 MHz  
WDW: EM  
SSB: 0  
LB: 0.30 Hz  
GB: 0  
PC: 1.00

10 MHz plot parameters  
CX: 34.00 cm  
FIP: 5.105 ppm  
F1: 4583.80 Hz  
F2: -255.07 Hz  
FREQ: 0.28280 ppm/cm  
RGCM: 141.43/27 Hz/cm



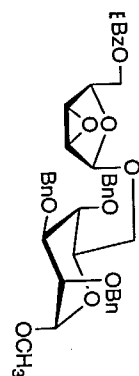

24

ppm

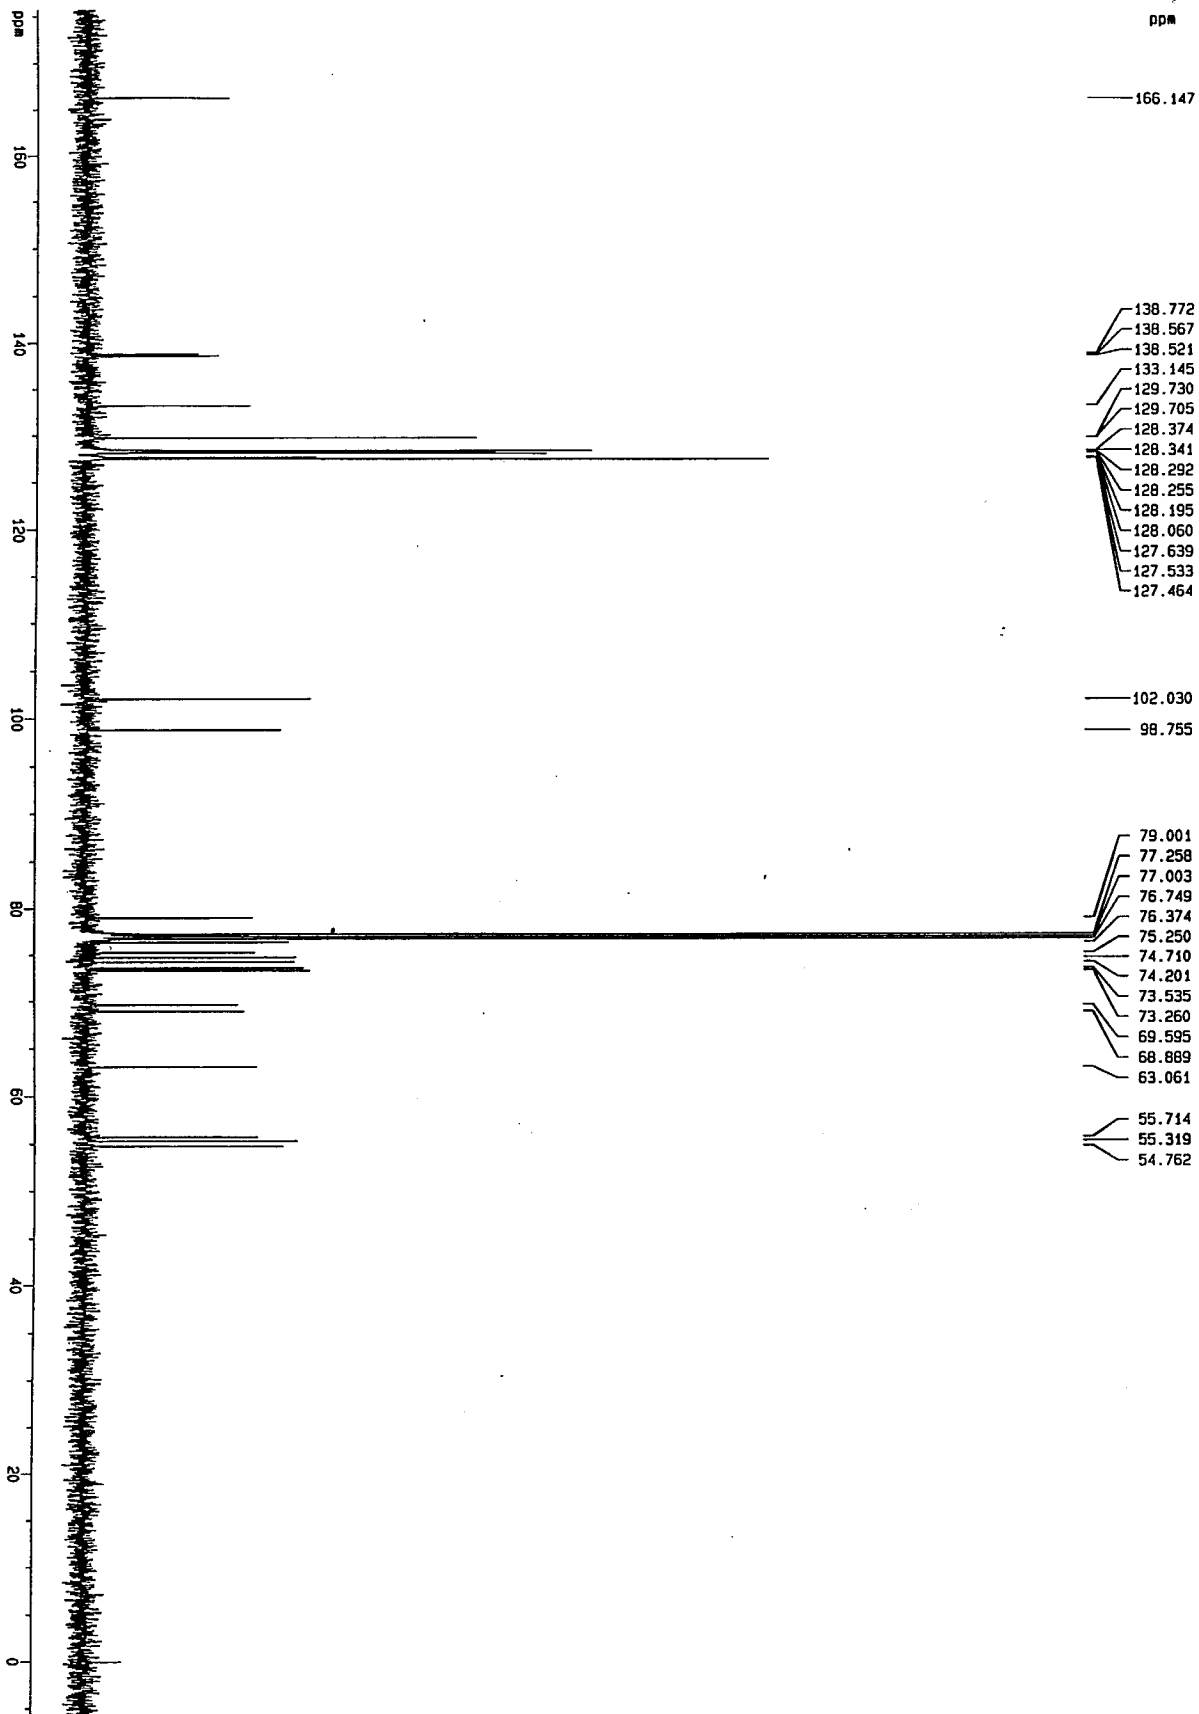

Current Data Parameters  
NAME CoupledFinal  
EXPNO 201  
PROCNO 1

F2 - Acquisition Parameters  
Date\_ 20001104  
Time 18.11  
INSTRUM spect  
PROBHD 5 mm BBO BB-1  
PULPROG zgpg30  
TD 65536  
SOLVENT CDCl<sub>3</sub>  
NS 156  
DS 4  
SWH 31448.541 Hz  
FIDRES 0.478936 Hz  
AQ 1.0420724 sec  
RG 4897.8  
DM 15.900 usec  
DE 6.00 usec  
TE 300.0 K  
D1 2.00000000 sec  
D11 0.03000000 sec  
D12 0.00002000 sec

===== CHANNEL f1 =====  
NUC1 13C  
P1 7.50 usec  
PL1 3.00 dB  
SFO1 125.7715719 MHz

===== CHANNEL f2 =====  
CPDPRG2 waltz16  
NUC2 1H  
PULPROG 1H  
PCPD2 100.00 usec  
PL2 -1.00 dB  
PL12 18.80 dB  
PL13 18.80 dB  
SFO2 500.1326005 MHz

F2 - Processing parameters  
SI 32768  
SF 125.7577974 MHz  
WDW EM  
SSB 0  
LB 1.00 Hz  
GB 0  
PC 1.40

10 NMR plot parameters  
CX 34.00 cm  
F1P 175.674 ppm  
F1 22082.43 Hz  
F2P -5.911 ppm  
F2 -748.33 Hz  
PRNCH 5.34074 ppm/cm  
NCHN 671.84020 Hz/cm

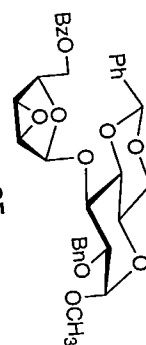

ppm

8.09091  
8.07585  
7.58841  
7.57359  
7.48984  
7.46357  
7.44874  
7.43351  
7.42305  
7.40841  
7.39351  
7.38143  
7.36706  
7.35235  
7.33655  
7.32204  
7.30659

5.59313  
5.40901  
4.91286  
4.88875  
4.79589  
4.77177  
4.66325  
4.65680  
4.61436  
4.60238  
4.31044  
4.24527  
4.23317  
4.21864  
4.19771  
3.85445  
3.84527  
3.82754  
3.77454  
3.75474  
3.72046  
3.70173  
3.66992  
3.66319  
3.65143  
3.64472  
3.50309  
3.43588  
2.34737  
2.31819

1.31098  
0.13055  
0.05153

ppm

Integral

2.424  
3.360  
11.639  
1.000  
1.003  
0.988  
1.138  
3.293  
1.103  
2.118  
6.474  
1.425  
3.402

Current Data Parameters  
NAME Coupling  
EXPNO 180  
PROCNO 1  
F2 - Acquisition Parameters  
Date\_ 20001004  
Time 16.04  
INSTRUM spect  
PROBHD 5 mm BBO BB-1  
PULPROG zg30  
TD 65536  
SOLVENT CDCl3  
NS 33  
DS 2  
SWH 10330.578 Hz  
FIDRES 0.157632 Hz  
AQ 3.171923 sec  
RG 64  
DM 48.400 usec  
DE 6.00 usec  
TE 300.0 K  
D1 1.0000000 sec

===== CHANNEL f1 =====  
NUC1 1H  
P1 13.70 usec  
PL1 -1.00 dB  
SFO1 500.135085 MHz

F2 - Processing parameters  
SI 32768  
SF 500.135085 MHz  
WDW EM  
SSB 0  
LB 0.30 Hz  
GB 0  
PC 1.00

1D NMR plot parameters  
CX 34.00 cm  
F1P 5.784 ppm  
F1 4893.25 Hz  
F2P -1.030 ppm  
F2 -515.32 Hz  
PRMCH 0.31807 ppm/cm  
HZCM 159.07532 Hz/cm

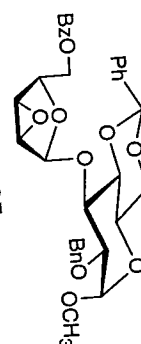

25

ppm

166.090  
137.894  
137.262  
133.012  
129.739  
129.657  
128.631  
128.464  
128.284  
128.091  
128.012  
127.992  
125.840  
103.718  
100.892  
98.915  
80.105  
78.811  
78.665  
77.252  
76.998  
76.743  
74.230  
73.742  
68.801  
63.037  
62.428  
56.249  
55.254  
0.934

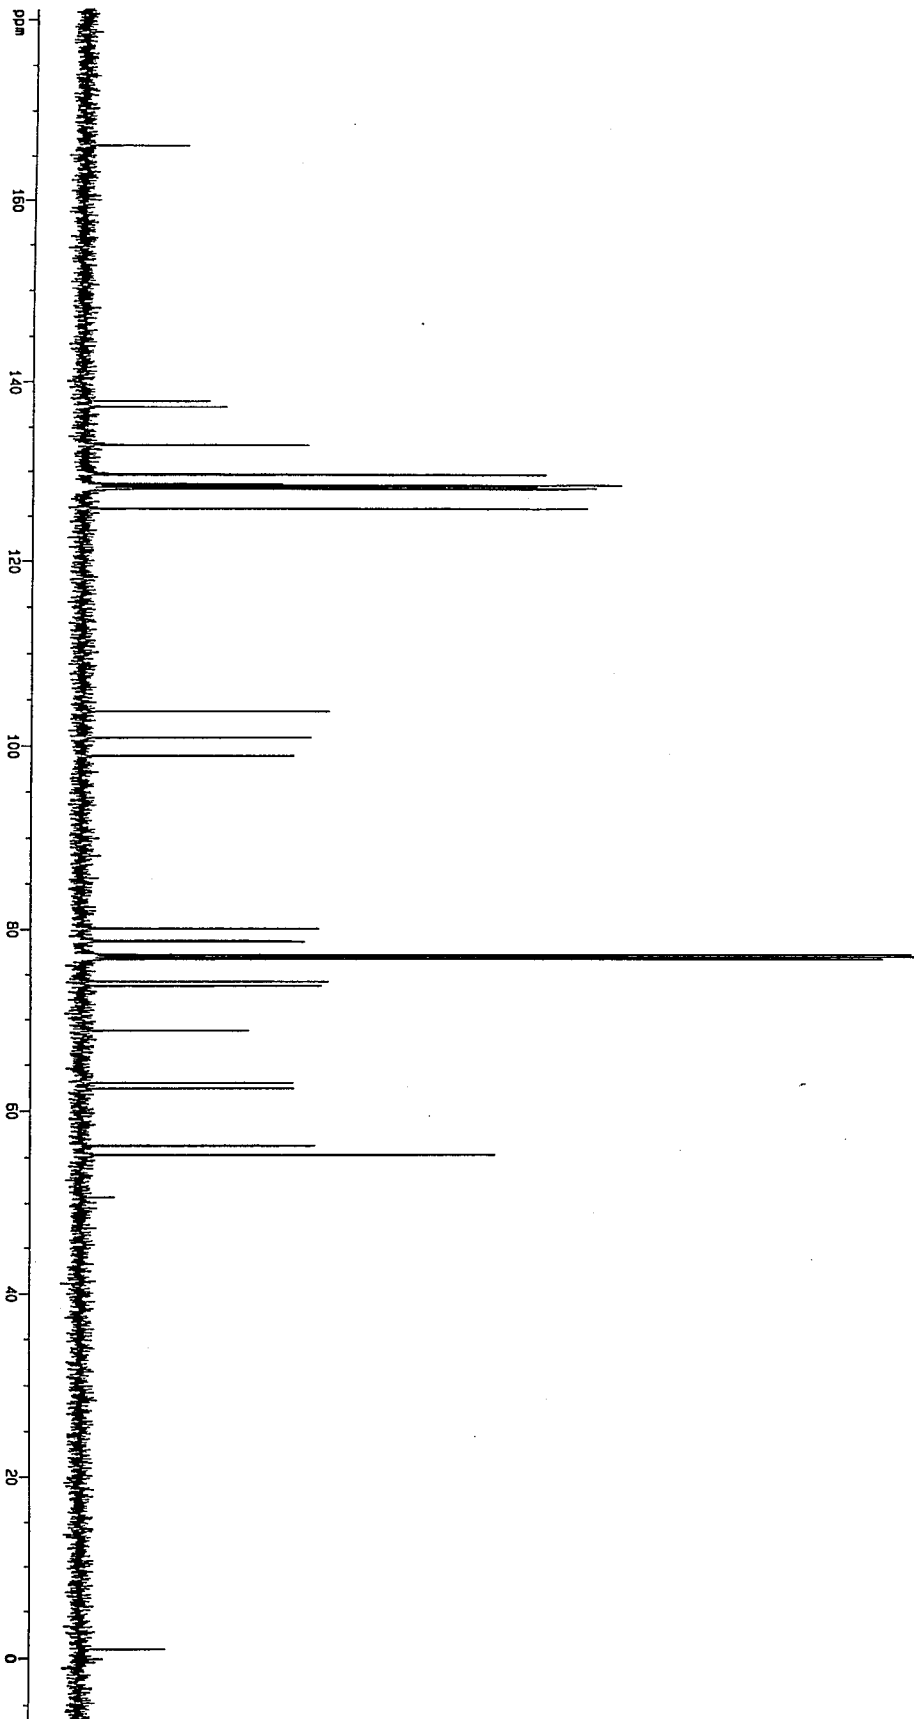

Current Data Parameters  
NAME Couplerfinal  
EXPNO 181  
PROCNO 1  
F2 - Acquisition Parameters  
Date\_ 20001104  
Time 16.11  
INSTRUM spect  
PROBHD 5 mm BBO BB-1  
PULPROG zgpg30  
TO 65536  
SOLVENT CDCl3  
NS 97  
DS 4  
SMH 31446.541 Hz  
FIDRES 0.478836 Hz  
AQ 1.0420724 sec  
RG 5792.6  
DM 15.900 usec  
DE 6.00 usec  
TE 300.0 K  
D1 2.00000000 sec  
D11 0.03000000 sec  
D12 0.00002000 sec

===== CHANNEL f1 =====  
NUC1 13C  
P1 7.50 usec  
PL1 3.00 dB  
SFO1 125.7715719 MHz

===== CHANNEL f2 =====  
CPROG2 waltz16  
NUC2 1H  
PCPD2 100.00 usec  
PL2 -1.00 dB  
PL12 18.80 dB  
PL13 18.80 dB  
SFO2 500.1350005 MHz

F2 - Processing parameters  
SI 32768  
SF 125.757042 MHz  
SF 500.1350005 MHz  
WDW EM  
SSB 0  
LB 1.00 Hz  
GB 0  
PC 1.40

1D NMR plot parameters  
CX 34.00 cm  
F1P 181.089 ppm  
F1 22774.58 Hz  
F2P -7.060 ppm  
F2 -887.82 Hz  
PPMCH 5.53407 ppm/cm  
HZCM 695.95300 Hz/cm

ppm

Integral

ppm

1.9871

1.0276

2.0332

0.9380

0.9943

1.0000

2.0263

1.9723

1.0476

1.0401

1.0573

1.1738

2.8452

1.1958

2.9452

3.2884

8.11648

8.10203

7.62771

7.61288

7.59804

7.50466

7.48904

7.47371

7.30676

5.26246

5.17368

4.98119

4.61182

4.59968

4.31505

4.27989

4.20766

4.20466

4.04006

4.02870

3.94950

3.93869

3.89853

3.86534

3.83519

3.78904

3.78355

3.73822

3.73228

3.72484

3.71930

3.70241

3.69664

3.45477

3.43709

1.65818

1.46835

1.29810

0.04188

26

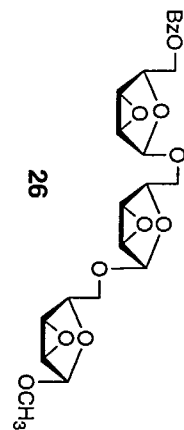

Current Data Parameters  
NAME Coupler1  
EXPNO 150  
PROCNO 1  
F2 - Acquisition Parameters  
Date\_ 20001004  
Time 8.25  
INSTRUM spect  
PROBHD 5 mm BBO BB-1  
PULPROG zgpg30  
TD 65536  
TO SOLVENT CDCl<sub>3</sub>  
NS 41  
DS 2  
SWH 10330.578 Hz  
FIDRES 0.157632 Hz  
AQ 3.1719823 sec  
RG 228.1  
DE 48.400 usec  
TE 300.0 K  
D1 1.00000000 sec

===== CHANNEL f1 =====  
NUC1 31P  
P1 13.20 usec  
PL 0.00 dB  
SFO1 500.136063 MHz

F2 - Processing parameters  
SI 32768  
SF 500.136063 MHz  
WDW EM  
SSB 0  
LB 0.30 Hz  
GB 0  
PC 1.00

10 MHz plot parameters  
CX 34.00 cm  
C1P 9.308 ppm  
F1 4655.63 Hz  
F2P -1.321 ppm  
F2 -560.28 Hz  
PRNCH 0.30626 ppm/cm  
R2CH 153.41763 Hz/cm

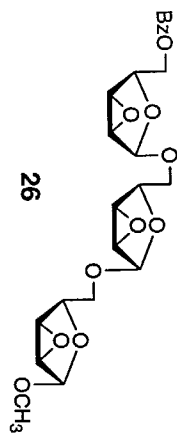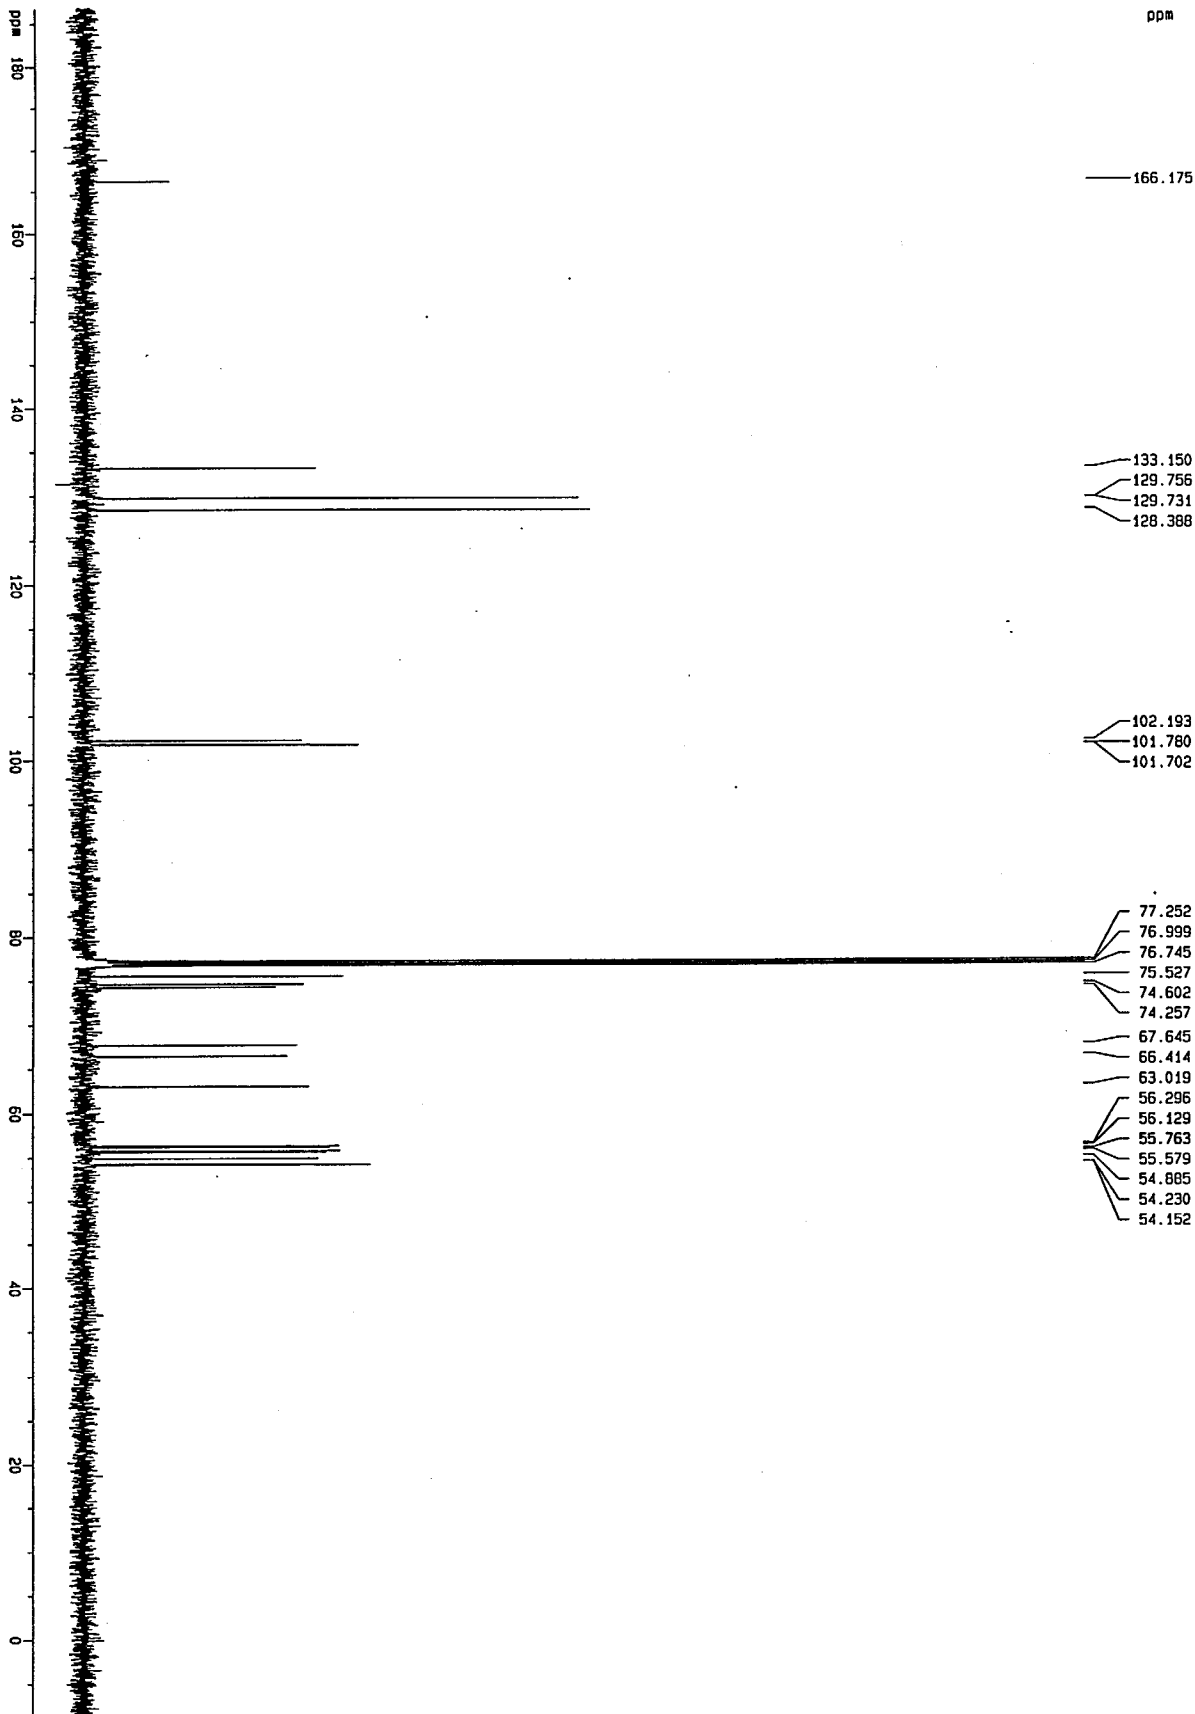

Current Data Parameters  
NAME Coupling In1  
EXPNO 151  
PROCNO 1  
F2 - Acquisition Parameters  
Date\_ 2000104  
Time 8.35  
INSTRUM spect  
PROBHD 5 mm BBO BB-1  
PULPROG zgpg30  
TD 65536  
SOLVENT CDCl3  
NS 276  
DS 4  
SH 3146.541 Hz  
FIDRES 0.478356 Hz  
AQ 1.0420724 sec  
RG 5160.6  
DW 15.900 usec  
DE 6.00 usec  
TE 300.0 K  
D1 2.00000000 sec  
D11 0.03000000 sec  
D12 0.00000000 sec

===== CHANNEL f1 =====  
NUC1 13C  
P1 7.50 usec  
PL1 3.00 dB  
SF01 125.7715719 MHz

===== CHANNEL f2 =====  
CPOPRG2 waltz16  
NUC2 1H  
PCPD2 100.00 usec  
PL2 -1.00 dB  
PL12 16.80 dB  
PL13 16.80 dB  
SF02 500.1360005 MHz

F2 - Processing parameters  
SI 32768  
SF 125.7677855 MHz  
WDW EM  
SSB 0  
LB 1.00 Hz  
DB 0  
PC 1.40

1D NMR Plot parameters  
CX 34.00 cm  
F1P 185.643 ppm  
F1 23472.08 Hz  
F2P -6.634 ppm  
F2 -1085.84 Hz  
FREQM 5.74532 ppm/cm  
HZCM 722.23197 Hz/cm

ppm

8.11364  
8.11185  
8.09770  
8.09498  
7.48335  
7.46769  
7.45203  
7.43776  
7.37076  
7.35541  
7.34030  
7.33808  
7.32578  
7.31823  
7.30652  
7.29796  
7.28797  
7.28360  
7.27743

5.45357  
4.94048  
4.80319  
4.77886  
4.77455  
4.73124  
4.72339  
4.70664  
4.69978  
4.60766  
4.59573  
4.56348  
4.53939  
4.48959  
4.46495  
4.44023  
4.21910  
3.87593  
3.86788  
3.86195  
3.85593  
3.80610  
3.80083  
3.79268  
3.78666  
3.60715  
3.50047  
3.48800  
3.48072

1.67328  
0.05490

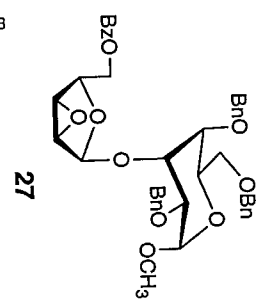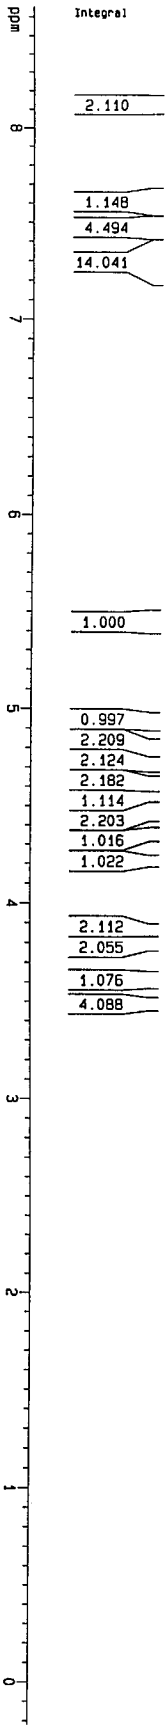

Integral

2.110  
1.148  
4.494  
14.041  
1.000  
0.997  
2.209  
2.124  
2.182  
1.114  
2.203  
1.016  
1.022  
2.112  
2.055  
1.076  
4.088

Current Data Parameters  
NAME 12-7-00  
EXPNO 50  
PROCNO 1  
F2 - Acquisition Parameters  
Date\_ 20001207  
Time 18.39  
INSTRUM spect  
PROBHD 5 mm BBO BB-1  
PULPROG zg30  
TD 65536  
SOLVENT CDCl3  
NS 17  
DS 2  
SWH 10330.578 Hz  
FIDRES 0.157632 Hz  
AQ 3.171923 sec  
RG 128  
DM 48.400 usec  
DE 6.00 usec  
TE 300.0 K  
D1 1.00000000 sec

===== CHANNEL f1 =====  
NUC1 1H  
P1 13.70 usec  
PL1 -1.00 dB  
SFO1 500.1330885 MHz

F2 - Processing parameters  
SI 32768  
SF 500.1300000 MHz  
WDW EM  
SSB 0  
LB 0.30 Hz  
GB 0  
PC 1.00

10 NMR plot parameters  
CX 34.00 cm  
F1P 8.653 ppm  
F1 4327.50 Hz  
F2P -0.216 ppm  
F2 -107.98 Hz  
PPOCM 0.26084 ppm/cm  
HZCM 130.45508 Hz/cm

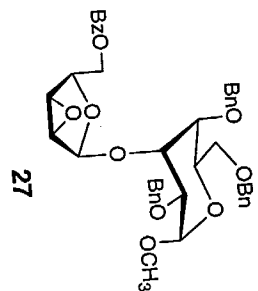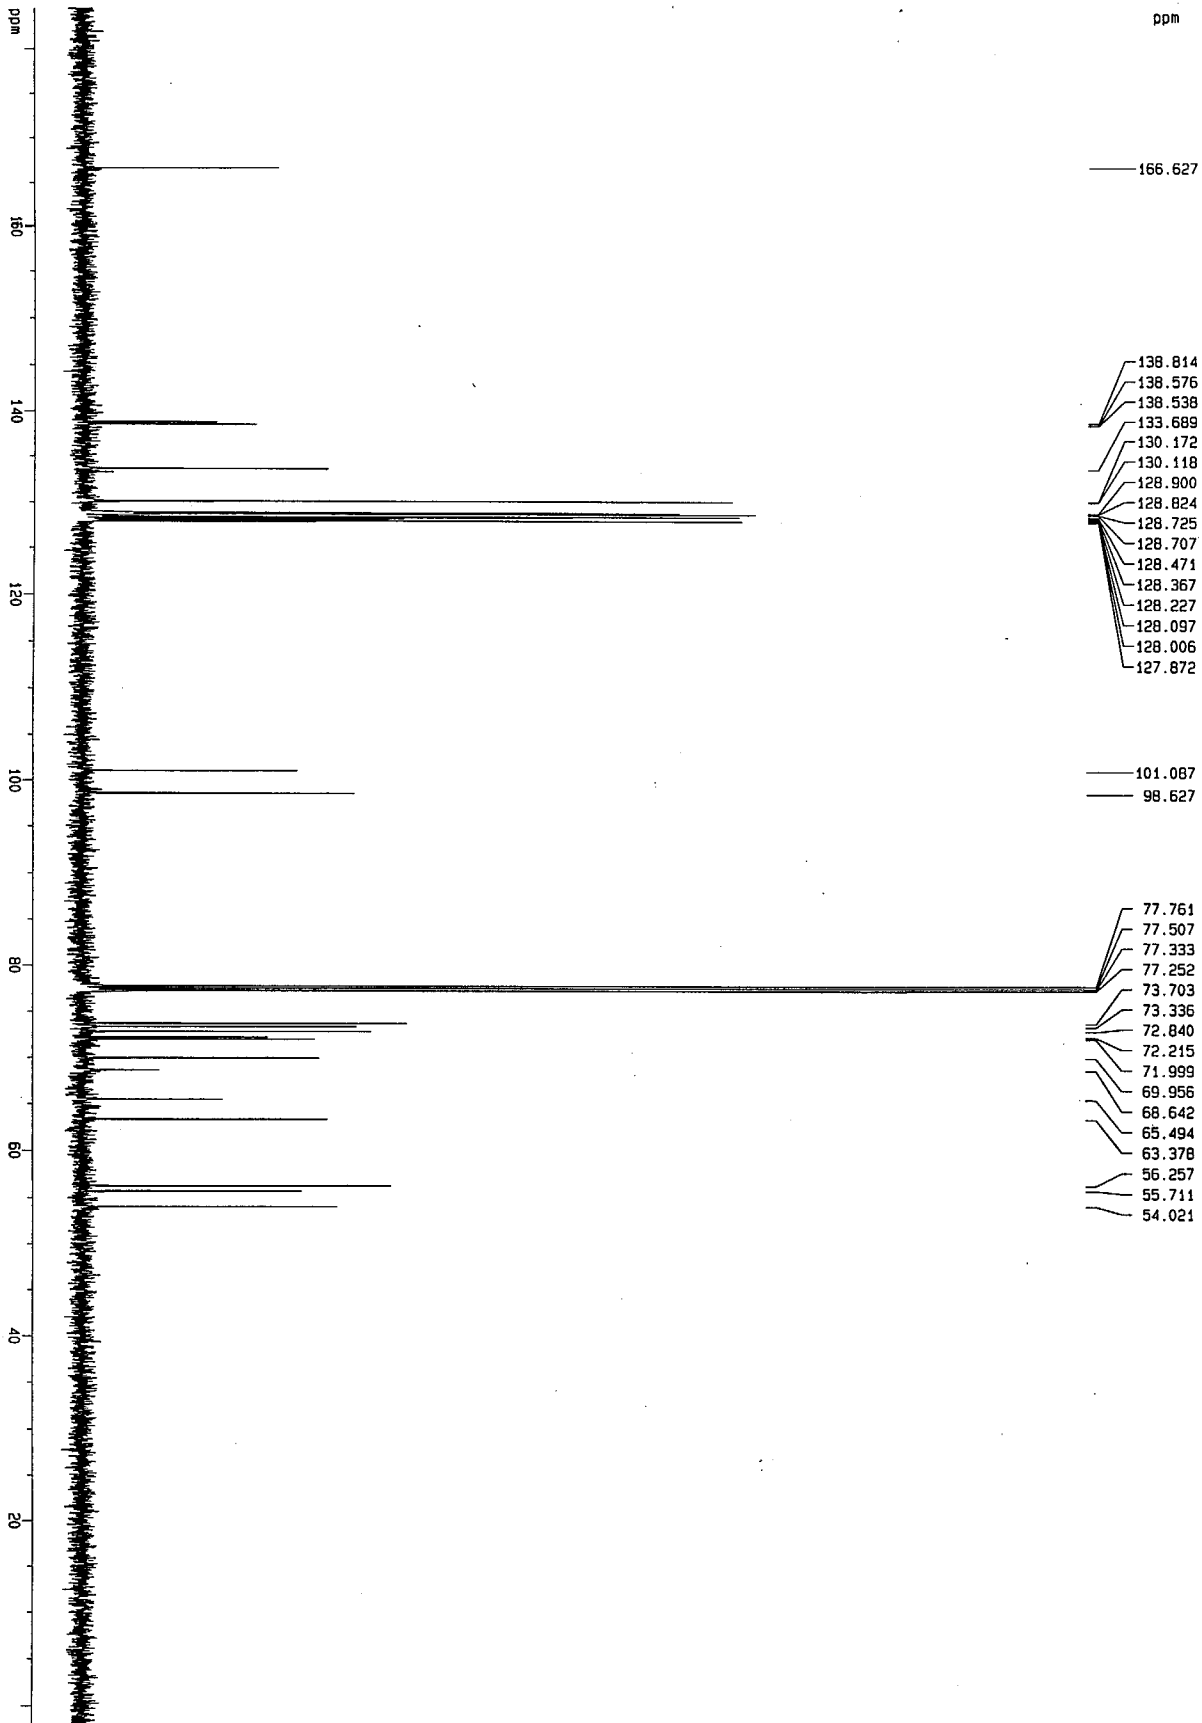

Current Data Parameters  
NAME 12-7-00  
EXPNO 11  
PROCNO 1

F2 - Acquisition Parameters  
Date\_ 20001207  
Time 8.12  
INSTRUM spect  
PROBHD 5 mm BBO BB-1  
PULPROG zgpg30  
TD 65536  
SOLVENT CDCl3  
NS 101  
DS 4  
SWH 31446.544 Hz  
FIDRES 0.475936 Hz  
AQ 1.0420724 sec  
RG 4096  
DM 15.500 usec  
DE 6.00 usec  
TE 300.0 K  
D1 2.00000000 sec  
D11 0.03000000 sec  
D12 0.00020000 sec

===== CHANNEL f1 =====  
NUC1 13C  
P1 8.00 usec  
PL1 3.00 dB  
SF01 125.77157719 MHz

===== CHANNEL f2 =====  
CPDPRG2 waltz16  
NUC2 1H  
PCPD2 100.00 usec  
PL2 -1.00 dB  
PL12 18.80 dB  
PL13 18.80 dB  
SF02 500.1320005 MHz

F2 - Processing parameters  
SI 32768  
SF 125.7577395 MHz  
NCH 8  
SSB 0  
LB 1.00 Hz  
GB 0  
PC 1.40

1D NMR plot parameters  
CX 34.00 cm  
F1P 184.355 ppm  
F1 23184.16 Hz  
F2P -2.160 ppm  
F2 -271.36 Hz  
PNUCK 5.48574 ppm/cm  
HZCM 699.87476 Hz/cm

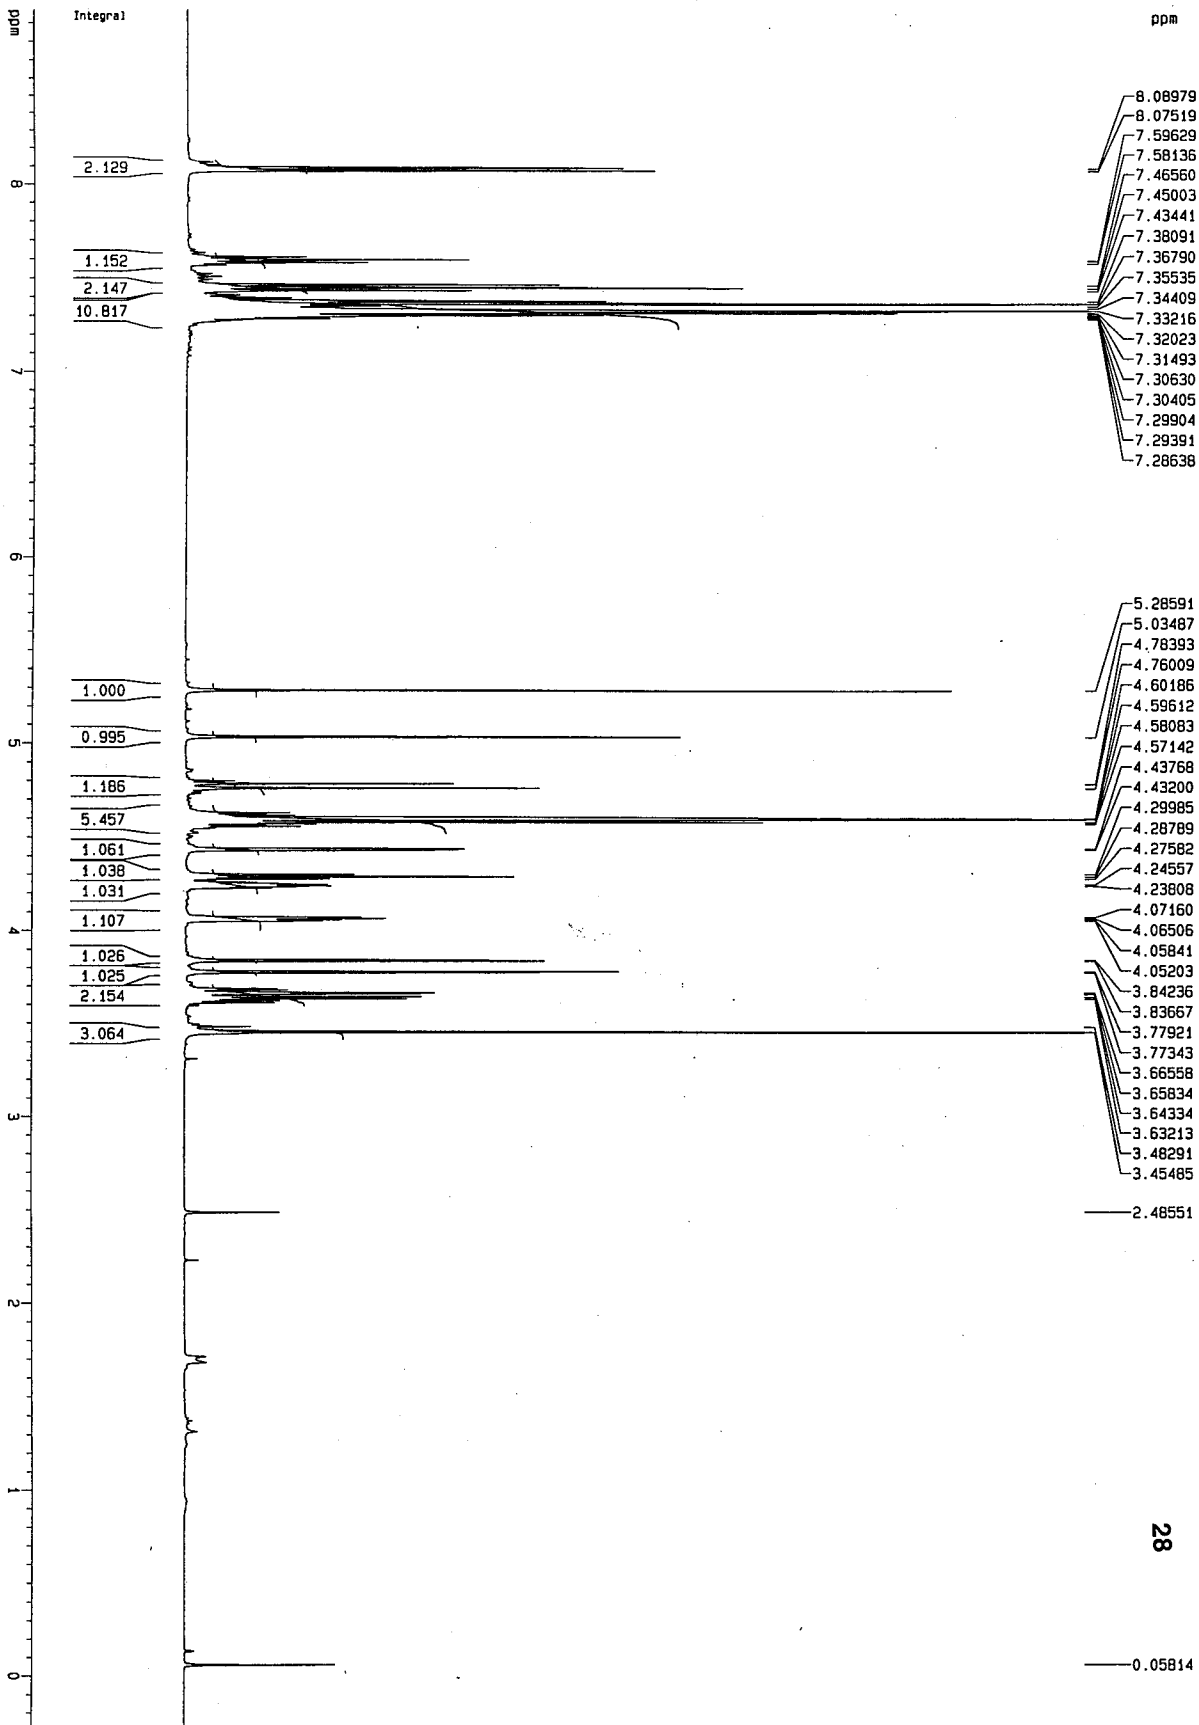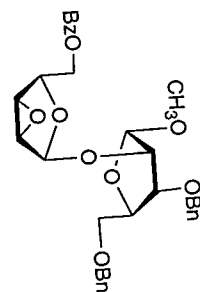

Current Data Parameters  
NAME 12-5-00  
EXPNO 10  
PROCNO 1

F2 - Acquisition Parameters  
Date\_ 20001205  
Time 8.04  
INSTRUM spect  
PROBHD 5 mm BBO BB-1  
PULPROG zgpg30  
TD 65536  
SOLVENT DMSO  
NS 15  
DS 2  
SWH 10330.578 Hz  
FIDRES 0.167832 Hz  
AQ 3.1719282 sec  
RG 301.5  
DM 416.400 ussec  
DE 6.00 ussec  
TE 300.0 K  
D1 1.00000000 sec

===== CHANNEL f1 =====  
NUC1 1H  
P1 13.70 ussec  
PL1 -1.00 dB  
SF01 500.130885 MHz

F2 - Processing parameters  
SI 32768  
SF 500.130000 MHz  
WDW EM  
SSB 0  
LB 0.30 Hz  
GB 0  
PC 1.00

10 NMR plot parameters  
CX 34.00 cm  
FIP 8.969 ppm  
F1 4489.91 Hz  
F2P -0.284 ppm  
F2 -141.92 Hz  
PPMCH 0.27215 ppm/cm  
HZCH 135.11258 Hz/cm



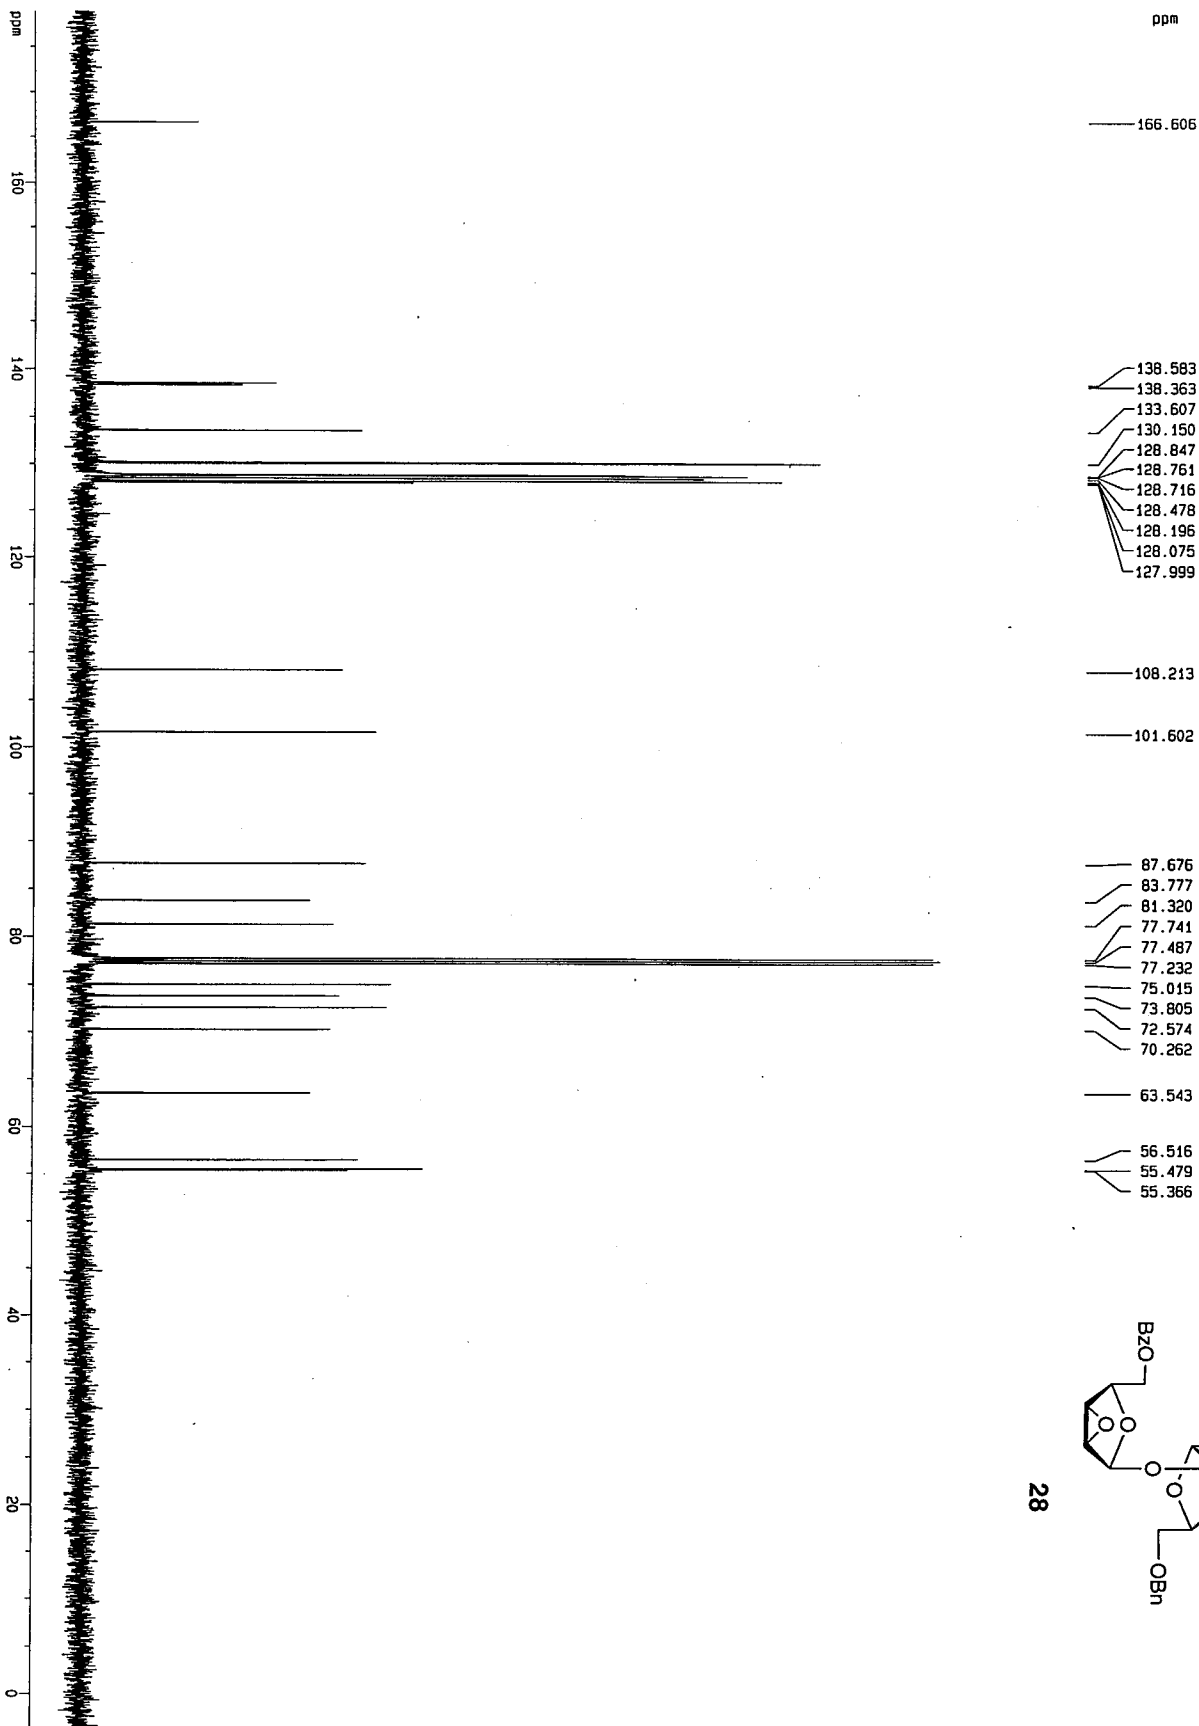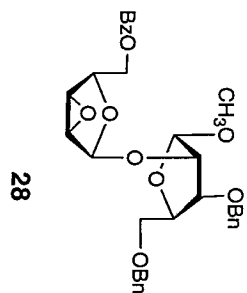

Current Data Parameters  
 NAME 12-5-00  
 EXPNO 11  
 PROCNO 1

F2 - Acquisition Parameters  
 Date\_ 20001003  
 Time 8.10  
 INSTRUM spect  
 PROBR0 5 mm BBO BP-1  
 PULPROG zgpg30  
 TO 60536  
 SOLVENT DMS  
 NS 4  
 DS 4  
 SMH 31445.541 Hz  
 FIDRES 0.475836 Hz  
 AQ 1.0420724 sec  
 RG 4056  
 DM 15.500 usec  
 DE 6.00 usec  
 TE 300.0 K  
 D1 2.00000000 sec  
 D11 0.03000000 sec  
 D12 0.0002000 sec

===== CHANNEL f1 =====  
 NUC1 13C  
 P1 8.00 usec  
 PL1 3.00 dB  
 SFO1 125.7715719 MHz

===== CHANNEL f2 =====  
 CPDPRG2 waltz16  
 NUC2 1H  
 PPD02 100.00 usec  
 PL2 -1.00 dB  
 PL12 18.90 dB  
 PL13 18.90 dB  
 SFO2 500.132005 MHz

F2 - Processing parameters  
 SI 32768  
 SF 125.757750 MHz  
 NQM EN  
 SS0 0  
 LB 1.00 Hz  
 BB 0  
 PC 1.40

10 NMR plot parameters  
 CX 34.00 cm  
 FLIP 178.878 ppm  
 F1 22495.30 Hz  
 F2p -3.529 ppm  
 F2 -443.79 Hz  
 PP4CH 5.36491 ppm/cm  
 HZCM 674.67932 Hz/cm

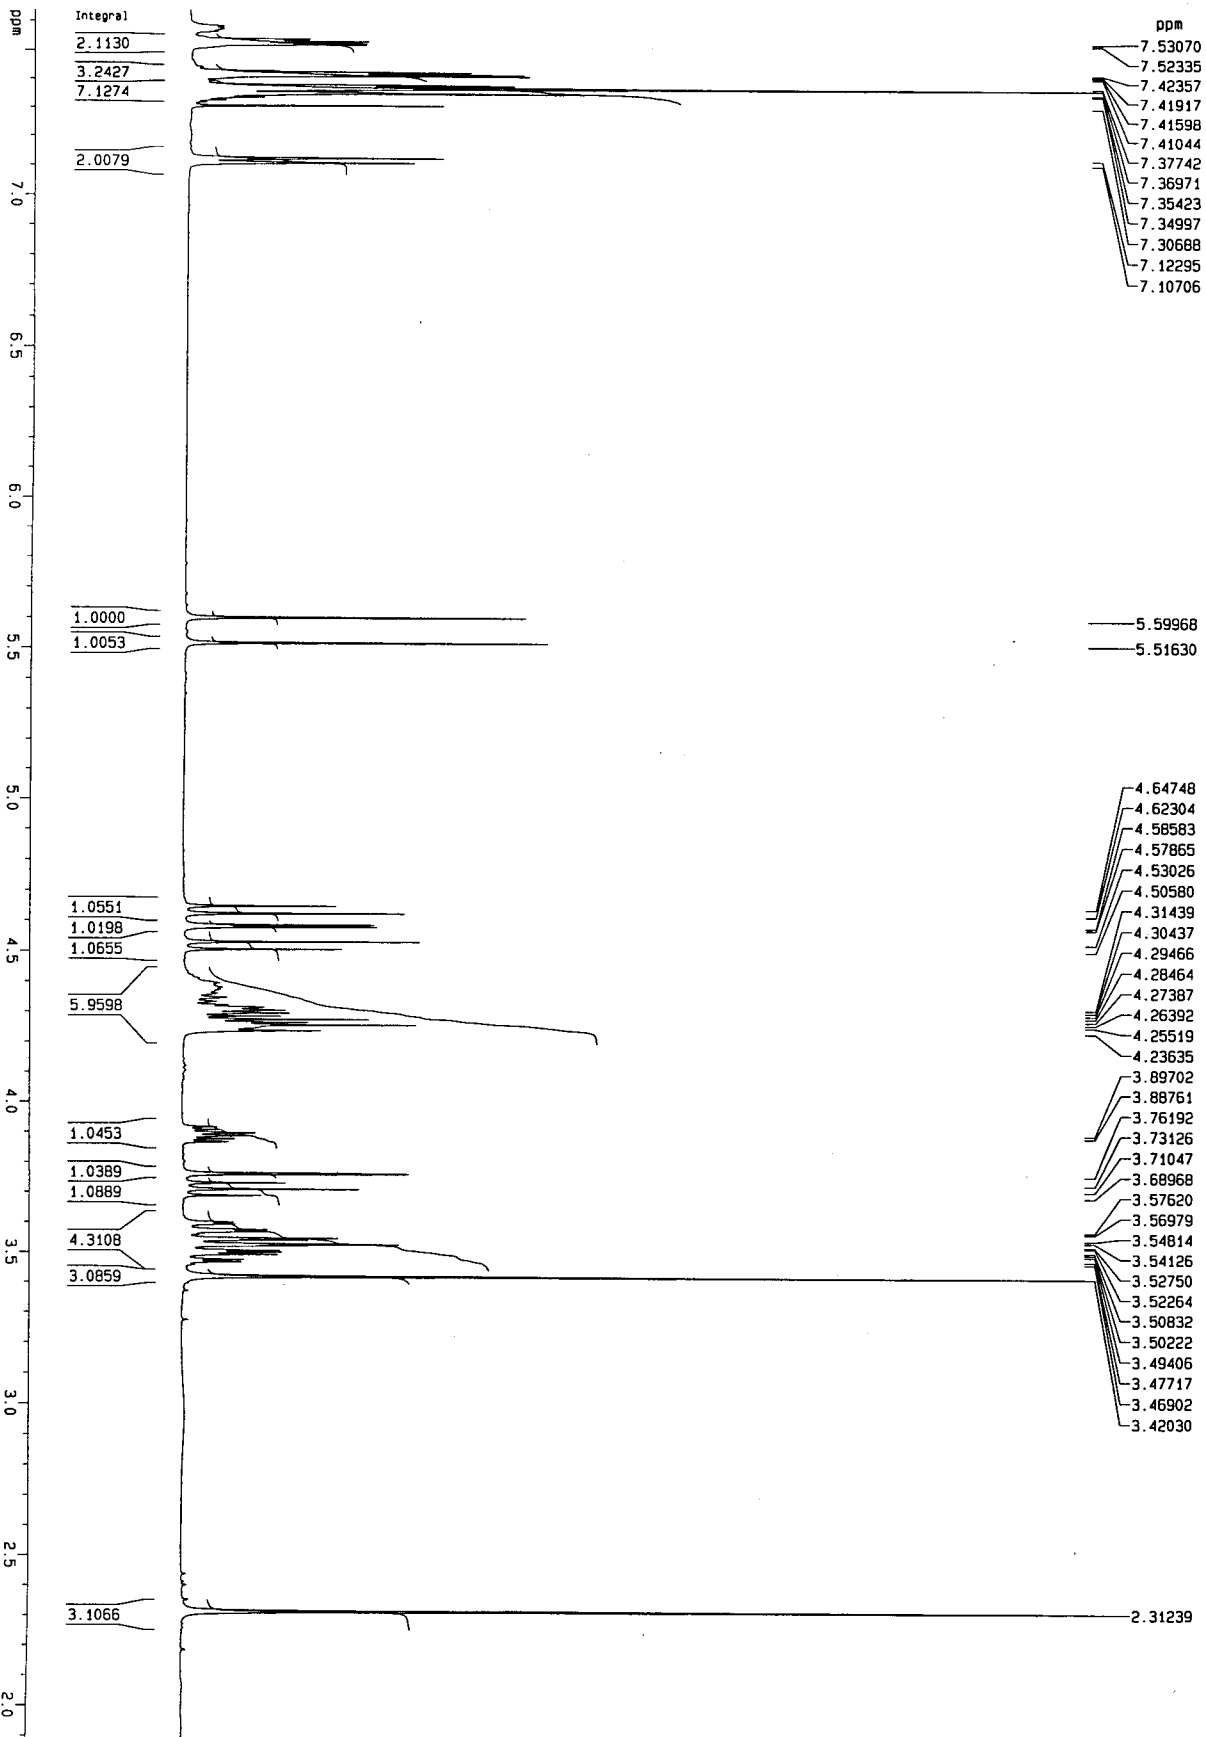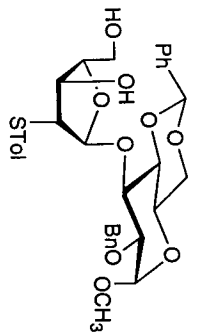

Current Data Parameters  
NAME 12-13-00  
EXPNO 10  
PROCNO 1

F2 - Acquisition Parameters  
Date\_ 20001213  
Time 13 05  
INSTRUM spect  
PROBHD 5 mm BBO BB-1  
PULPROG zgpg30  
TD 65536  
SOLVENT CDCl3  
NS 512  
DS 2  
SWH 10330.578 Hz  
FIDRES 0.157632 Hz  
AQ 3.1719823 sec  
RG 143.7  
DM 48.400 usec  
DE 6.00 usec  
TE 300.0 K  
D1 1.00000000 sec

===== CHANNEL f1 =====  
NUC1 1H  
P1 13.70 usec  
PL1 -1.00 dB  
SF01 500.1300885 MHz

F2 - Processing parameters  
SI 32768  
SF 500.1300000 MHz  
WDW EM  
SSB 0  
LB 0.30 Hz  
GB 0  
PC 1.00

10 NMR plot parameters  
CX 34.00 cm  
FIP 7.535 ppm  
F1 3818.32 Hz  
F2 1.888 ppm  
PPMCH 944.32 Hz  
PCHCH 0.16902 ppm/cm  
HZCH 84.52856 Hz/cm

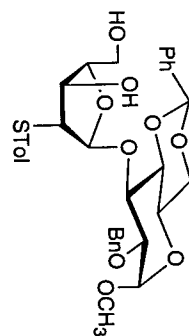

ppm

ppm

137.999  
136.911  
132.330  
131.330  
130.379  
130.319  
129.981  
129.258  
128.990  
128.700  
128.594  
128.567  
126.975

108.400  
102.906  
99.100

82.686  
80.396  
80.157  
78.077  
77.708  
77.454  
77.199  
75.190  
73.505  
69.392

62.905  
61.624  
59.953  
55.862

22.978  
21.443

0.423

Current Data Parameters  
NAME 12-13-00  
EXPNO 11  
PROCNO 1

F2 - Acquisition Parameters  
Date\_ 20001213  
Time 13.15

INSTRUM spect  
PROBHD 5 mm BBO BB-1  
PULPROG zgpg30  
TO 28980  
SOLVENT CDCl3  
NS 304  
DS 4

SH 31446.541 Hz  
FIDRES 0.473636 Hz  
AQ 1.0420724 sec  
RG 8192

DM 15.900 usec  
DE 6.00 usec  
TE 300.0 K  
D1 2.00000000 sec  
D11 0.03000000 sec  
D12 0.00002000 sec

\*\*\*\*\* CHANNEL f1 \*\*\*\*\*  
NUC1 13C  
P1 8.00 usec  
PL1 3.00 dB  
SF01 125.7715719 MHz

\*\*\*\*\* CHANNEL f2 \*\*\*\*\*  
CPDPRG2 waltz16  
NUC2 1H  
PCPD2 100.00 usec  
PL2 -1.00 dB  
PL12 18.80 dB  
PL13 18.80 dB  
SF02 500.1320005 MHz

F2 - Processing parameters  
SI 32768  
SF 125.7677390 MHz  
KOH EM  
SSB 0  
LB 1.00 Hz  
GB 0  
PC 1.40

10 MHz plot parameters  
CX 34.00 cm  
F1P 161.623 ppm  
F1 20325.39 Hz  
F2P -1.896 ppm  
F2 -237.13 Hz  
PPMCH 4.80909 ppm/cm  
HZCH 604.78003 Hz/cm
